# Supplementary material
Source: PubMed Central journal article supplement (PMC3517069)
Supplement: NIHMS412651-supplement-Supporting_Information.pdf [file NIHMS412651-supplement-Supporting_Information.pdf]

## Table of Contents

|                                                          |            |
|----------------------------------------------------------|------------|
| <b>Chemical Materials and Method.....</b>                | <b>S1</b>  |
| <b>Synthetic Procedures.....</b>                         | <b>S2</b>  |
| <b>Stereochemical Assignment of S2.....</b>              | <b>S13</b> |
| <b>X-Ray Structure of 30.....</b>                        | <b>S14</b> |
| <b><sup>1</sup>H and <sup>13</sup>C NMR Spectra.....</b> | <b>S15</b> |

### Chemical Materials and Methods.

Unless stated otherwise, reactions were conducted in oven-dried glassware under an atmosphere of nitrogen or argon using anhydrous solvents (either freshly distilled or passed through activated alumina columns). HMPA and TMSCl were purified by distillation over CaH<sub>2</sub>. TBSCl and methyl vinyl ketone were purified by distillation from neat solutions. All other commercially obtained reagents were used as received. Reaction temperatures were controlled using an IKA Mag temperature modulator. Thin-layer chromatography (TLC) was conducted with E. Merck silica gel 60 F254 pre-coated plates, (0.25 mm) and visualized by exposure to UV light (254 nm) or stained with anisaldehyde, ceric ammonium molybdate, potassium permanganate and iodine. Flash column chromatography was performed using normal phase silica gel (60 Å, 230-240 mesh, Merck KGA) with a Biotage Isolera One chromatography system. <sup>1</sup>H NMR spectra were recorded on Bruker spectrometers (at 500 or 600 MHz) and are reported relative to deuterated solvent signals. Data for <sup>1</sup>H NMR spectra are reported as follows: chemical shift (δ ppm), multiplicity, coupling constant (Hz) and integration. <sup>13</sup>C NMR spectra were recorded on Bruker Spectrometers (at 125 or 150 MHz). Data for <sup>13</sup>C NMR spectra are reported in terms of chemical shift. IR spectra were recorded on a Varian 640-IR spectrometer and are reported in terms of frequency of absorption (cm<sup>-1</sup>). Blue LEDs (30 cm, 1 watt) were purchased from <http://www.creativelightings.com> and powered by 8 AA batteries. Optical rotations were measured with a Jasco P-1010 polarimeter. High resolution mass spectra were obtained from the UC Irvine Mass Spectrometry Facility with a Micromass LCT spectrometer. See *JOC Standard Abbreviations and Acronyms* for abbreviations (available at [http://pubs.acs.org/userimages/ContentEditor/1218717864819/jocean\\_abbreviations.pdf](http://pubs.acs.org/userimages/ContentEditor/1218717864819/jocean_abbreviations.pdf)).

## Synthetic Procedures

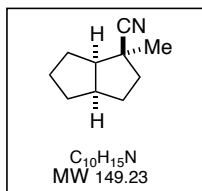

**rac-1-methyl-cis-octahydropentalene-1-endo-carbonitrile (S2):** The nitrile was prepared according to the procedure of van Leusen.<sup>1</sup> A solution of *cis*-bicyclo[3.3.0]-octa-2-one<sup>2</sup> (3.50 g, 27.7 mmol) in dimethoxyethane (140 mL) and EtOH (4.0 mL) was cooled to 0 °C. To the stirred solution was added toluenesulfonylmethyl isocyanide (5.94 g, 30.5 mmol) and potassium *tert*-butoxide (6.82 g, 60.9 mmol). The resulting mixture was stirred and allowed to warm to RT. After 18 h, 150 mL of hexanes was added and the resulting mixture was filtered through Celite and the filtrate was concentrated. The residue was purified by column chromatography (100 g of SiO<sub>2</sub>, 0–5% ethyl acetate/ hexanes) to provide *cis*-octahydropentalene-1-carbonitrile<sup>3</sup> (**S1**) as a pale yellow oil (1.9 g, 51%) and ~0.9:1 mixture of unassigned diastereomers: <sup>1</sup>H NMR (CDCl<sub>3</sub>, 500 MHz, for both isomers) δ 2.53 (m), 2.47 (m), 2.26 (m), 1.80 (m), 1.40 (m), 1.2 (m); <sup>13</sup>C NMR (CDCl<sub>3</sub>, 125 MHz, for both isomers) δ 123.2, 121.8, 49.3, 45.0, 43.0, 42.9, 35.6, 34.6, 33.8, 33.5, 33.0, 32.8, 32.4, 31.9, 31.4, 30.3, 27.2, 25.6; IR (thin film) 2865, 2235, 1451, 1319 cm<sup>-1</sup>; HRMS (GC/TOF) calculated for C<sub>9</sub>H<sub>13</sub>N (M+Na) 158.0946, observed 158.0947. The mixture of nitriles (1.20 g, 8.95 mmol) was dissolved in THF (25 mL) and cooled to –78 °C. A solution of 0.5 M LDA (24 mL, 12 mmol) in THF was added slowly over 5 min. After 15 min, neat MeI (0.72 mL, 12 mmol) was added dropwise to the yellow solution. After 30 min, saturated aqueous NH<sub>4</sub>Cl (100 mL) and Et<sub>2</sub>O (100 mL) was added to the solution. The layers were separated and the aqueous layer was extracted with Et<sub>2</sub>O (2 x 100 ml). The combined organic layers were dried (Na<sub>2</sub>SO<sub>4</sub>) and concentrated to yield **S2** (1.20 g, ~95%) as a clear oil and a ~5:1 mixture of diastereomers. The indicated stereochemistry is of the major isomer and was determined by NOE as shown on page 13: <sup>1</sup>H NMR (CDCl<sub>3</sub>, 500 MHz) δ 2.61 (m, 2H, minor isomer), 2.55 (m, 1H, major isomer), 2.23

<sup>1</sup> O. H. Oldenzien, D. van Leusen, A. M. van Leusen, *J. Org. Chem.* **1977**, *42*, 3114.

<sup>2</sup> Prepared in two steps. 2-endo-hydroxy-*cis*-bicyclo[3.3.0]-octane was prepared according to the procedure of Whitesell (J. K. Whitesell, P. D. White *Synthesis*, **1975**, 602) from cyclooctene oxide. Oxidation of the secondary alcohol to form *cis*-bicyclo[3.3.0]-octa-2-one is known using

<sup>2</sup> Prepared in two steps. 2-endo-hydroxy-*cis*-bicyclo[3.3.0]-octane was prepared according to the procedure of Whitesell (J. K. Whitesell, P. D. White *Synthesis*, **1975**, 602) from cyclooctene oxide. Oxidation of the secondary alcohol to form *cis*-bicyclo[3.3.0]-octa-2-one is known using CrO<sub>3</sub> (J. K. Whitesell, M. A. Minton, S. W. Felman, *J. Org. Chem.* **1983**, *48*, 2193.). The Swern protocol was employed in these studies with similar results.

<sup>3</sup> This compound was prepared previously through hydrogenation of 2,3,3a,4,5,6-hexahydropentalene-1-carbonitrile (see, A. C. Cope, M. Brown, *J. Am. Chem. Soc.* **1958**, *80*, 2859).

(m, 1H, major isomer), 2.06 (m), 1.78 (m), 1.69 (m), 1.50 (m), 1.42 (s, 3H, minor isomer), 1.41 (s, 3H, major isomer), 1.34 (m);  $^{13}\text{C}$  NMR ( $\text{CDCl}_3$ , 125 MHz, for major isomer)  $\delta$  124.8, 53.9, 43.1, 38.9 (2C), 34.1, 31.4, 31.3, 26.8, 25.4; IR (thin film) 2951, 2231, 1453, 1380  $\text{cm}^{-1}$ ; HRMS (GC/TOF) calculated for  $\text{C}_{10}\text{H}_{15}\text{N}$  ( $\text{M}+\text{Na}$ ) 172.1102, observed 172.111.

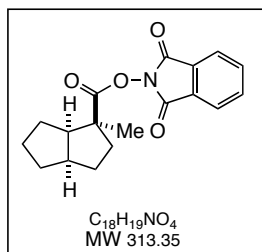

***rac*-1,3-dioxoisindolin-2-yl 1-methyl-*cis*-octahydropentalene-1-*endo*-carboxylate (15):** A solution of KOH (3.0 g) in ethylene glycol (30 mL) was prepared by degassing with argon for 5 minutes and heating to 100 °C. The solution was added to a vial containing **S2** (1.30 g, 5.99 mmol) and a stir bar. The vial was sealed and heated to 160 °C

for 18 h. The viscous solution was allowed to cool and added to a mixture of 1N HCl (300 mL) and  $\text{CH}_2\text{Cl}_2$  (150 mL) and the layers were separated. The aqueous layer was extracted with  $\text{CH}_2\text{Cl}_2$  (3 x 150 mL). The combined organic layers were dried ( $\text{Na}_2\text{SO}_4$ ) and concentrated to provide the crude acid (**S3**) that was used without further purification:  $^1\text{H}$  NMR ( $\text{CDCl}_3$ , 500 MHz, for major isomer)  $\delta$  2.53 (m, 1H), 2.24 (m, 1H), 2.04 (m, 1H), 1.78 (m, 2H), 1.44 (m, 1H), 1.33 (m, 1H), 125 (m, 2H) 1.22 (s, 3H), 1.11 (m, 1H);  $^{13}\text{C}$  NMR ( $\text{CDCl}_3$ , 125 MHz, for major isomer)  $\delta$  183.4, 53.9, 41.8, 35.3, 32.6, 31.3, 30.6, 27.5, 24.7; IR (thin film) 2951, 1696, 1468, 1288  $\text{cm}^{-1}$ ; HRMS (ESI/TOF) calculated for  $\text{C}_{10}\text{H}_{15}\text{O}_2$  ( $\text{M}-\text{H}$ ) 167.1072, observed 167.1065. The acid **S3** from above was dissolved in THF (60 mL) and *N*-hydroxy-phthalimide (1.45 g, 8.90 mmol), *N,N'*-dicyclohexylcarbodiimide (1.83 g, 8.90 mmol), and 4-dimethylaminopyridine (70 mg, 0.29 mmol) were added sequentially. After 18 h, saturated aqueous  $\text{NH}_4\text{Cl}$  (100 mL) and ethyl ether (100 mL) were added to the resulting solution. The layers were separated and the aqueous layer was extracted with  $\text{Et}_2\text{O}$  (2 x 100 mL). The combined organic layers were dried ( $\text{Na}_2\text{SO}_4$ ) and concentrated. The residue was purified by column chromatography ( $\text{SiO}_2$ , 1–10% ethyl acetate/hexanes) to yield **15** (1.35 g, 72%) as a white solid and a 7.8:1 mixture of diastereomers: m.p. 83–85 °C;  $R_f$  0.28 (10% ethyl acetate/hexanes),  $^1\text{H}$  NMR ( $\text{CDCl}_3$ , 500 MHz, for major isomer)  $\delta$  7.86 (m, 2H), 7.77 (m, 2H), 2.64 (m, 1H), 2.44 (m, 1H), 2.16 (m, 1H), 2.08 (m, 1H), 1.94 (m, 2H), 1.66 (m, 2H), 1.47 (s, 3H), 1.38 (m, 2H), 1.24 (m, 2H);  $^{13}\text{C}$  NMR ( $\text{CDCl}_3$ , 125 MHz, for major isomer)  $\delta$  173.2, 162.3, 134.8, 129.2, 124.0, 54.0, 42.0, 35.4, 35.0, 33.0, 31.6, 30.3, 27.6, 24.7; IR (thin film) 2950, 1783, 1745, 1467, 1369  $\text{cm}^{-1}$ ; HRMS (ESI/TOF) calculated for  $\text{C}_{18}\text{H}_{19}\text{NO}_4$  ( $\text{M}+\text{Na}$ ) 336.1212, observed 336.1211.

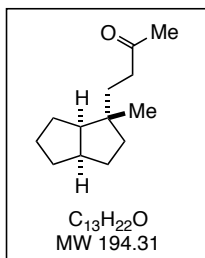

**rac-4-(1-endo-methyl-cis-octahydropentalen-1-yl)butan-2-one (18):** To a solution of **18** (63 mg, 0.20 mmol) in 2:1 THF:H<sub>2</sub>O (1.3 mL) in a 1 dram vial was added 1,4-dihydrobenzyl-nicotinamide (85 mg, 0.30 mmol),<sup>4</sup> methyl vinyl ketone (25  $\mu$ L, 0.30 mmol), and Ru(bpy)<sub>3</sub>Cl<sub>2</sub> (1.5 mg, 0.0020 mmol). The red solution was irradiated with blue LEDs (placed in the center of a 30 cm loop of blue LEDs) for 90 min. Hexanes was added to the mixture and

the mixture was loaded onto a silica column. Purification by column chromatography (SiO<sub>2</sub>, 1–10% ethyl acetate/hexanes) yielded **18** (27 mg, 70%) as a clear oil and as a single diastereomer:<sup>5</sup> R<sub>f</sub> 0.39 (10% ethyl acetate/hexanes); <sup>1</sup>H NMR (CDCl<sub>3</sub>, 500 MHz)  $\delta$  2.45 (m, 1H), 2.34 (m, 2H), 2.12 (s, 3H), 1.92 (apt. q,  $J = 8.6$  Hz, 1H), 1.82 (m, 2H), 1.58 (m, 1H), 1.47 (m, 3H), 1.30 (m, 3H), 1.18 (m, 2H), 1.09 (m, 1H), 0.84 (s, 3H); <sup>13</sup>C NMR (CDCl<sub>3</sub>, 125 MHz)  $\delta$  210.1, 53.6, 43.6, 42.8, 39.9, 37.8, 35.3, 35.1, 31.5, 30.1, 29.4, 28.1, 21.4; IR (thin film) 2944, 2863, 1718, 1764, 1356 cm<sup>-1</sup>; HRMS (GC/TOF) calculated for C<sub>13</sub>H<sub>22</sub>O (M+NH<sub>4</sub>) 212.2014, observed 212.2009.

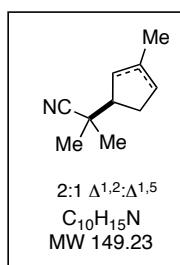

**(R)-2-methyl-2-(3-methylcyclopent-2-enyl)propanenitrile and (R)-2-methyl-2-(3-methylcyclopent-3-enyl)propanenitrile (20):** The original procedure reported by Kreiser has been slightly modified.<sup>6</sup> To a 2-L 1-necked round bottom with a large stir bar was added sequentially EtOH (1.2 L), (+)-fenchone (100 g, 0.65 mol), NH<sub>2</sub>OH-HCl (78 g, 1.1 mol), and NaOAc (106 g, 1.30 mol). The flask was equipped with a reflux condenser and the stirred

mixture was heated at reflux for 36 h. The reaction was cooled to RT and concentrated on a rotary evaporator to approximately 400 mL. H<sub>2</sub>O (1 L) was added to the reaction mixture and the oxime was isolated as a white solid by filtration. The white solid was added to a 2L round bottom with a large stir bar and 4 M H<sub>2</sub>SO<sub>4</sub> (1 L) was added. The flask was equipped with a reflux condenser and the stirred mixture was heated at reflux for 8 h and cooled to RT. Pentane (300 mL) was added to the reaction mixture and the organic layer was separated, dried over Na<sub>2</sub>SO<sub>4</sub>, and concentrated. Distillation (110 °C, 10 tor) afforded the nitrile **20** as 2.0:1 mixture of olefin isomers (81.0 g, 83%). The spectral data obtained matched that obtained by Kreiser. Higher field

<sup>4</sup> Prepared according to the procedure of Zhu from nicotinamide (X. Q. Zhu, J. Y. Zhang, J. P. Cheng, *J. Org. Chem.* **2006**, *71*, 7007).

<sup>5</sup> See the supporting information of the preceding communication in this issue for stereochemical assignment.

<sup>6</sup> W. Kreiser, P. Below *Liebigs Ann. Chem.* **1985**, 203.

NMR data is provided for reference:  $^1\text{H}$  NMR ( $\text{CDCl}_3$ , 600 MHz)  $\delta$  5.26 (s, 1H, major isomer), 5.23 (s, 1H, minor isomer), 2.73 (m, 1H, major isomer), 2.40 (m, 1H, minor isomer), 2.24 (m), 2.08 (m), 1.74 (m), 1.66 (s, 3H, minor isomer), 1.29 (s, 3H, minor isomer), 1.28 (s, 3H, minor isomer), 1.26 (s, 3H, major isomer), 1.24 (s, 3H, major isomer);  $^{13}\text{C}$  NMR ( $\text{CDCl}_3$ , 155 MHz, major and minor)  $\delta$  144.8, 139.3, 125.1, 124.4, 123.2, 123.0, 55.0, 47.8, 38.7, 36.6, 36.55, 36.5, 35.5, 28.6, 25.6, 25.4, 24.6, 24.55, 16.8, 16.7.

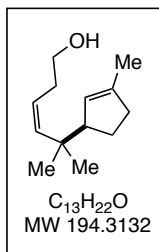

**(R,Z)-5-methyl-5-(3-methylcyclopent-2-enyl)hex-3-en-1-ol (21):** A 3L flask was charged with the nitrile **20** (23.5 g, 158 mmol) and  $\text{CH}_2\text{Cl}_2$  (1 L). The flask was equipped with an addition funnel and cooled to  $-78\text{ }^\circ\text{C}$  via a dry ice bath and DIBAL (126 mL of  $\sim 25\%$  solution in toluene, 189 mmol) was added slowly. The dry ice/ acetone bath was removed and the solution was allowed to warm to RT. After 2 h, an ice bath was added and 2N HCl (600 mL) was

slowly added. The reaction was allowed to warm to RT and stirring was maintained for 18 h. The two layers were separated and the organic layer was dried over  $\text{Na}_2\text{SO}_4$  and concentrated to afford the crude aldehyde, which was used without further purification. 3-Hydroxypropyltriphenylphosphonium bromide<sup>7</sup> (126 g, 316 mmol) was added to a 5-L 3-necked flask, THF (1.6 L) was added, and the flask was equipped with an addition funnel, an overhead mechanical stirrer, and an internal temperature probe. The mixture was cooled to  $0\text{ }^\circ\text{C}$  and *n*BuLi (250 mL of a 2.5 M in hexanes solution, 630 mmol) was added slowly while maintaining the temperature below  $10\text{ }^\circ\text{C}$  as a dark solution was formed. After 15 min, TMSCl (39.0 mL, 316 mmol) in THF (100 mL) was added via addition funnel. After 20 min, the reaction was cooled to  $-78\text{ }^\circ\text{C}$  and the aldehyde from above was added in THF (50 mL) over 1 h while the temperature was maintained below  $-60\text{ }^\circ\text{C}$ . After the addition, the cooling bath was removed and the reaction was allowed to warm to  $0\text{ }^\circ\text{C}$ . After 10 min, 1.0 L of 2 M  $\text{H}_2\text{SO}_4$  was added and vigorous stirring was maintained. After 18 h at RT, the layers were separated and the aqueous layer was washed with  $\text{Et}_2\text{O}$  ( $2 \times 200\text{ mL}$ ). The combined organic layers were concentrated and passed through a silica plug ( $\sim 300\text{ g}$   $\text{SiO}_2$ , 20% ethyl acetate/hexanes). The material was further purified to separate the olefin isomers by column chromatography (600 g of 6%  $\text{AgNO}_3$  embedded  $\text{SiO}_2$ , 10% acetone/hexanes) to obtain the more polar desired alcohol **21** as a light yellow oil (16.8 g,

<sup>7</sup> Accessed by refluxing 3-bromo-1-propanol and triphenylphosphine in toluene and filtering the resulting solid. See, for example, R. Wang, S. C. Lu, Y. M. Zhang, Z. J. Shi, W. Zhang, *Org. Biomol. Chem.* **2011**, 9, 5802.

55% overall (82% if based on the 66% of desired olefin isomer in starting material)):  $R_f$  0.35 (20% ethyl acetate/hexanes);  $^1\text{H NMR}$  ( $\text{CDCl}_3$ , 500 MHz)  $\delta$  5.42 (d,  $J = 12.3$  Hz, 1H), 5.21 (m, 2H), 3.62 (t,  $J = 6.5$  Hz, 2H), 2.46 (q,  $J = 7.1$  Hz, 2H), 2.30 (m, 2H), 2.11 (m, 3H), 1.70 (bs, 1H), 1.64 (s, 3H), 1.06 (s, 6H);  $^{13}\text{C NMR}$  ( $\text{CDCl}_3$ , 125 MHz)  $\delta$  140.4, 139.8, 125.1, 123.8, 63.0, 50.1, 39.00, 38.95, 34.8, 32.4, 26.9, 26.8, 16.9; IR (thin film) 3343, 2949, 1378, 1049  $\text{cm}^{-1}$ ; HRMS (GC/TOF) calculated for  $\text{C}_{13}\text{H}_{22}\text{O}$  ( $\text{M}+\text{NH}_4$ ) 212.2014, observed 212.2018;  $[\alpha]_{\text{D}}^{24} +62.2^\circ$ ,  $[\alpha]_{577}^{24} +62.8^\circ$ ,  $[\alpha]_{546}^{24} +71.64$ ,  $[\alpha]_{435}^{24} +122.4^\circ$ ,  $[\alpha]_{405}^{24} +144.6^\circ$ , ( $c = 1.0$ ,  $\text{CHCl}_3$ ).

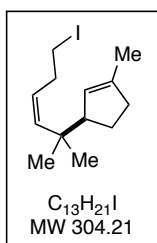

**(R,Z)-1-methyl-3-(2-methyl-6-iodohex-3-en-2-yl)cyclopent-1-ene (S4):** The alcohol **21** (10.2 g, 52.6 mmol) was dissolved in benzene (260 mL) and cooled in an ice bath. To the solution was added sequentially imidazole (3.93 g, 57.8 mmol),  $\text{PPh}_3$  (14.4 g, 55.2 mmol), and  $\text{I}_2$  (13.9 g, 55.2 mmol) and the ice bath was removed and the mixture was stirred for 18 h at RT.  $\text{NaHSO}_3$  (1 g) and saturated aqueous  $\text{NH}_4\text{Cl}$  (500 mL) was added to the mixture. The layers were separated and the aqueous layer was extracted with  $\text{Et}_2\text{O}$  (200 mL). The combined organic layers were dried with  $\text{Na}_2\text{SO}_4$  and concentrated. The residue was purified by column chromatography ( $\text{SiO}_2$ , 1% ethyl acetate/hexanes) to afford the desired iodide **S4** as a clear oil (15.1 g, 94%):  $R_f$  0.75 (5% ethyl acetate/hexanes);  $^1\text{H NMR}$  ( $\text{CDCl}_3$ , 500 MHz)  $\delta$  5.38 (d,  $J = 12.2$  Hz, 1H), 5.23 (bs, 1H), 5.11 (dt,  $J = 12.1, 7.3$  Hz, 1H), 3.12 (t,  $J = 7.5$  Hz, 2H), 2.76 (dq,  $J = 1.6, 7.3$  Hz, 2H), 2.62 (m, 1H), 2.16 (m, 2H), 1.90 (m, 1H), 1.66 (s, 3H), 1.63 (m, 1H), 1.11 (s, 3H), 1.10 (s, 3H);  $^{13}\text{C NMR}$  ( $\text{CDCl}_3$ , 125 MHz)  $\delta$  141.9, 140.4, 127.4, 126.0, 57.9, 39.9, 36.9, 32.8, 26.6, 26.3, 16.9, 5.9; IR (thin film) 2970, 1554, 1389, 1375, 1248  $\text{cm}^{-1}$ ; HRMS (GC/TOF) calculated for  $\text{C}_{13}\text{H}_{21}\text{I}$  ( $\text{M}+\text{NH}_4$ ) 322.1032, observed 322.1038;  $[\alpha]_{\text{D}}^{24} +41.3^\circ$ ,  $[\alpha]_{577}^{24} +43.6^\circ$ ,  $[\alpha]_{546}^{24} +49.6$ ,  $[\alpha]_{435}^{24} +84.9^\circ$ ,  $[\alpha]_{405}^{24} +99.6^\circ$ , ( $c = 1.0$ ,  $\text{CH}_2\text{Cl}_2$ ).

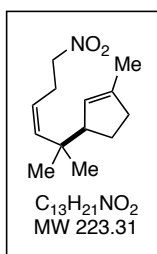

**(R,Z)-1-methyl-3-(2-methyl-6-nitrohex-3-en-2-yl)cyclopent-1-ene (22):** An aluminum foil covered flask was charged with iodide **S4** (20.3 g, 66.7 mmol) and a large stir bar and the flask was cooled in a ice bath.  $\text{AgNO}_2$  (15.3 g, 100 mol) was added to the flask in two portions and, after 5 min, the ice bath was removed and the heterogeneous mixture was allowed to stir for 18 h. 1% Ethyl acetate/hexanes (100 mL) was added and the mixture was applied to an equilibrated  $\text{SiO}_2$  column. Column chromatography (2–5% ethyl acetate/hexanes) afforded compound **22** as a light yellow oil (9.07 g, 67%):  $R_f$  0.33 (5% ethyl acetate/hexanes);  $^1\text{H NMR}$  ( $\text{CDCl}_3$ , 500 MHz)  $\delta$  5.44

(d,  $J = 12.2$  Hz, 1H), 5.21 (bs, 1H), 5.09 (dt,  $J = 12.1, 7.3$  Hz, 1H), 4.36 (t,  $J = 7.2$  Hz, 2H), 2.89 (q,  $J = 7.2$  Hz, 2H), 2.62 (m, 1H), 2.16 (m, 2H), 1.88 (m, 1H), 1.70 (s, 3H), 1.54 (m, 1H), 1.06 (s, 3H), 1.04 (s, 3H);  $^{13}\text{C}$  NMR ( $\text{CDCl}_3$ , 125 MHz)  $\delta$  142.6, 142.3, 125.8, 121.5, 75.7, 57.9, 40.0, 36.9, 26.9, 26.5, 26.4, 26.3, 16.9; IR (thin film) 2962, 1554, 1435, 1377  $\text{cm}^{-1}$ ; HRMS (GC/TOF) calculated for  $\text{C}_{13}\text{H}_{21}\text{NO}_2$  ( $\text{M}+\text{NH}_4$ ) 241.1916, observed 241.1921;  $[\alpha]_{\text{D}}^{24} +48.8^\circ$ ,  $[\alpha]_{577}^{24} +49.8^\circ$ ,  $[\alpha]_{546}^{24} +57.1^\circ$ ,  $[\alpha]_{435}^{24} +98.7^\circ$ ,  $[\alpha]_{405}^{24} +115.6^\circ$ , ( $c = 1.0, \text{CH}_2\text{Cl}_2$ ).

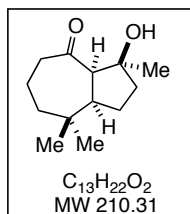

**(3*S*,3*aR*,8*aR*)-3-hydroxy-3,8,8-trimethyloctahydroazulen-4(5*H*)-one (23)**

To a solution of **22** (6.00 g, 26.9 mmol) in toluene (260 mL) was added triethylamine (1.9 mL, 14 mmol) and phenyl isocyanate (8.8 mL, 81 mmol) and the solution was heated to 90 °C for 18 h during which time a brown heterogeneous mixture was formed. Water (5 mL) was added to the mixture and it was allowed to cool to RT and partially concentrated (~50 mL). The mixture was passed through a silica plug with 40% ethyl acetate/hexanes and concentrated to afford the intermediate isoxazoline product contaminated with byproducts derived from phenyl isocyanate. This residue was dissolved in MeOH (200 mL) and H<sub>2</sub>O (15 mL) and 10% Pd/C (~300 mg), boric acid (4.90 g, 80.7 mmol), and Raney-Ni (~300 mg) were added. The solution was equipped with a hydrogen balloon, and the flask was evacuated and backfilled with H<sub>2</sub> (3×), and mixture was allowed to stir for 36 h until **23** was observed as the major product by LRMS. The mixture was filtered (Celite) and the solution was concentrated under reduced pressure to approximately 100 mL. Et<sub>2</sub>O (300 mL) and 1N HCl (300 mL) was added and the layers were separated. The aqueous layer was extracted with Et<sub>2</sub>O (2 x 300 mL). The combined organic layers were dried with Na<sub>2</sub>SO<sub>4</sub> and concentrated. The residue was purified by column chromatography (SiO<sub>2</sub>, 30% ethyl acetate/hexanes) to afford **23** as a clear oil (3.80 g, 67%): R<sub>f</sub>: 0.29 (20% ethyl acetate/hexanes);  $^1\text{H}$  NMR ( $\text{CDCl}_3$ , 500 MHz)  $\delta$  4.53 (bs, 1H), 2.62 (d,  $J = 10.8$  Hz, 1H), 2.43 (m, 1H), 2.33 (m, 1H), 2.07 (dt,  $J = 4.8, 10.7$  Hz, 1H), 1.95 (m, 1H), 1.74 (m, 1H), 1.62 (m, 3H), 1.50 (m, 1H), 1.30 (s, 3H), 1.32 (m, 2H), 1.00 (s, 6H);  $^{13}\text{C}$  NMR ( $\text{CDCl}_3$ , 125 MHz)  $\delta$  218.6, 80.9, 58.4, 50.3, 44.7, 44.1, 40.1, 35.0, 31.3, 26.7, 25.4, 19.1, 18.2; IR (thin film) 3480, 2962, 1683, 1223  $\text{cm}^{-1}$ ; HRMS (ESI/TOF) calculated for  $\text{C}_{13}\text{H}_{22}\text{O}_2$  ( $\text{M}+\text{Na}$ ) 233.1517, observed 233.1519;  $[\alpha]_{\text{D}}^{24} -67.9^\circ$ ,  $[\alpha]_{577}^{24} -72.1^\circ$ ,  $[\alpha]_{546}^{24} -84.1^\circ$ ,  $[\alpha]_{435}^{24} -174.7^\circ$ ,  $[\alpha]_{405}^{24} -220.1^\circ$ , ( $c = 1.0, \text{CH}_2\text{Cl}_2$ ).

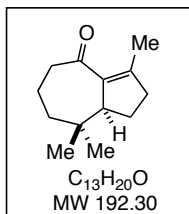

**(S)-3,8,8-trimethyl-1,2,6,7,8,8a-hexahydroazulen-4(5H)-one (24):** A solution of **23** (2.80 g, 13.3 mmol) was dissolved in toluene (130 mL) and *p*-toluenesulfonic acid (0.232 g, 1.33 mmol) was added and the solution was heated to 100 °C. After 6 h, the dark solution was cooled and concentrated under reduced pressure. The residue was purified by column chromatography

(SiO<sub>2</sub>, 3-4% ethyl acetate/hexanes) to afford enone **24** as a yellow oil (2.32 g, 91%): R<sub>f</sub>: 0.44 (20% ethyl acetate/hexanes); <sup>1</sup>H NMR (CDCl<sub>3</sub>, 500 MHz) δ 2.87 (m, 1H), 2.30 (m, 4H), 1.97 (s, 3H) 1.85 (m, 1H), 1.70 (m, 1H), 1.57 (m, 4H), 0.87 (s, 3H), 0.63 (s, 3H); <sup>13</sup>C NMR (CDCl<sub>3</sub>, 125 MHz) δ 203.5, 155.2, 138.6, 55.6, 46.3, 45.5, 38.6, 36.2, 30.5, 25.0, 21.3, 19.2, 16.9; IR (thin film) 2959, 1667, 1614, 1325 cm<sup>-1</sup>; HRMS (ESI/TOF) calculated for C<sub>13</sub>H<sub>20</sub>O (M+Na) 215.1412, observed 215.1412; [α]<sub>D</sub><sup>24</sup> +80.9°, [α]<sub>577</sub><sup>24</sup> +84.7°, [α]<sub>546</sub><sup>24</sup> +95.6°, [α]<sub>435</sub><sup>24</sup> +150.6° (c = 1.0, CH<sub>2</sub>Cl<sub>2</sub>).

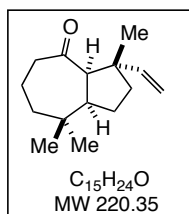

**(3S,3aR,8aR)-3,8,8-trimethyl-3-vinyloctahydroazulen-4(5H)-one (25):**

CuCN (229 mg, 2.58 mmol) was added to a 2-necked round bottom flask with an internal temperature probe and cooled to 0 °C and THF (1 mL) and HMPA (2 mL) was added. The mixture was stirred and maintained below 10 °C while a solution of 0.7 M vinyl magnesium bromide (7.1 mL, 5.0 mmol) in THF was

added slowly. The dark red solution was stirred for 10 min and then **24** (200 mg, 1.0 mmol) in THF (1 mL) was added slowly. The reaction was maintained at 0° C for 7 h with stirring as the reaction became dark and heterogeneous and then 1 N HCl (50 mL) and Et<sub>2</sub>O (50 mL) was added. The layers were separated and the aqueous layer was extracted with Et<sub>2</sub>O (2 x 50 ml). The combined organic layers were dried with Na<sub>2</sub>SO<sub>4</sub> and concentrated. The residue was purified by column chromatography (SiO<sub>2</sub>, 0-5% ethyl acetate/hexanes) to afford **25** as a clear oil and 4.8:1 mixture of diastereomers (178 mg, 77%): R<sub>f</sub>: 0.7 (10% Ethyl acetate/hexanes); <sup>1</sup>H NMR (CDCl<sub>3</sub>, 500 MHz, for major isomer) δ 5.80 (dd, *J* = 10.6, 17.6 Hz, 1H), 4.97 (d, *J* = 17.6 Hz, 1H), 4.92 (d, *J* = 10.6 Hz, 1H), 2.49 (d, *J* = 7.6 Hz, 1H), 2.35 (m, 2H), 2.13 (apt q, *J* = 9.8 Hz, 1H); 1.92 (m, 1H), 1.86 (m, 2H), 1.68 (m, 3H), 1.44 (m, 2H), 1.32 (m, 1H), 0.95 (s, 3H), 0.90 (s, 3H), 0.91 (s, 3H); <sup>13</sup>C NMR (CDCl<sub>3</sub>, 125 MHz, for major isomer) δ 215.4, 147.8, 110.4, 65.5, 49.6, 49.5, 45.0, 37.3, 36.1, 36.0, 32.7, 26.5, 25.0, 24.3, 22.7; IR (thin film) 2955, 1690, 1453, 1365 cm<sup>-1</sup>; HRMS (ESI/TOF) calculated for C<sub>15</sub>H<sub>24</sub>O (M+Na) 243.1725, observed 243.1723; [α]<sub>D</sub><sup>24</sup> +61.5° [α]<sub>577</sub><sup>24</sup> +63.8°, [α]<sub>546</sub><sup>24</sup> +72.5°, [α]<sub>435</sub><sup>24</sup> 147.8°, [α]<sub>405</sub><sup>24</sup> +189.9° (c = 1.0, CH<sub>2</sub>Cl<sub>2</sub>).



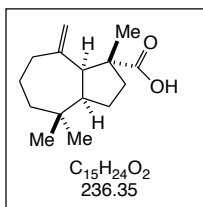

**(1R,3aR,8aS)-1,4,4-trimethyl-8-methylenedecahydroazulene-1-carboxylic acid (**26**):**<sup>8</sup>

A solution of 1 M (trimethylsilyl)methylolithium in pentane (3.3 mL, 3.3 mmol) was added to pentane (3.3 mL) at  $-78\text{ }^{\circ}\text{C}$ . To the cooled white mixture, **25** (150 mg, 0.67 mmol) in toluene (3 mL) was added slowly by syringe pump over 30 min. After 30 min, saturated aqueous  $\text{NaHCO}_3$  (20 mL) and  $\text{Et}_2\text{O}$  (20 mL) was added. The organic layers were separated and the aqueous layer was extracted with  $\text{Et}_2\text{O}$  (2 x 50 mL). The combined organic layers were dried with  $\text{Na}_2\text{SO}_4$  and concentrated to yield the crude  $\beta$ -silyl alcohol, which was used without further purification. The residue was dissolved in  $\text{CH}_2\text{Cl}_2$  (6.7 mL) and cooled to  $-78\text{ }^{\circ}\text{C}$ . Ozone was bubbled through the solution until a light blue color persisted ( $\sim 3$  min) and the starting material was consumed by TLC. Oxygen was bubbled through the solution until the blue color disappeared and an argon balloon was placed on the reaction. Triphenylphosphine (260 mg, 1.0 mmol) and HF-pyridine (200  $\mu\text{L}$ ) was added and the solution was placed in an ice bath. After 1 h at  $0\text{ }^{\circ}\text{C}$ ,  $\text{NaHCO}_3$  (50 mL) was slowly added to the solution and the mixture was allowed to warm to RT. After gas evolution ceased,  $\text{CH}_2\text{Cl}_2$  (20 mL) was added. The layers were separated and the aqueous layer was extracted with  $\text{CH}_2\text{Cl}_2$  (2 x 30 mL). The combined organic layers were dried with  $\text{Na}_2\text{SO}_4$  and concentrated to yield the crude aldehyde product, which was used without further purification. The residue was dissolved in acetone (4.5 mL) and  $\text{H}_2\text{O}$  (150  $\mu\text{L}$ ) and 1 M 2-methyl-2-butene in THF (2 mL, 2 mmol),  $\text{NaH}_2\text{PO}_4$  (119 mg, 1.0 mmol),  $\text{NaClO}_2$  (180 mg, 2.0 mmol) was added. After 30 min, saturated aqueous  $\text{NH}_4\text{Cl}$  (30 mL) and  $\text{CH}_2\text{Cl}_2$  (20 mL) were added. The layers were separated and the aqueous layer was extracted with  $\text{CH}_2\text{Cl}_2$  (3 x 30 mL). The combined organic layers were dried with  $\text{Na}_2\text{SO}_4$  and concentrated. The residue was purified by column chromatography ( $\text{SiO}_2$ , 0–15% ethyl acetate/hexanes) to afford the desired acid **26** as a waxy solid (117 mg, 74%): Rf: 0.38 (20% ethyl acetate/hexanes);  $^1\text{H}$  NMR ( $\text{C}_6\text{D}_6$ , 500 MHz)  $\delta$  4.83 (d,  $J = 2.0$  Hz, 1H), 4.75 (d,  $J = 2.0$  Hz, 1H), 3.37 (d,  $J = 7.9$  Hz, 1H), 2.47 (ddd,  $J = 5.4, 8.8, 13.8$

<sup>8</sup> Carboxylic acid **26** could also be prepared through hydrolysis of the corresponding tertiary nitrile ((1R,3aR,8aS)-1,4,4-trimethyl-8-methylenedecahydroazulene-1-carbonitrile) which was prepared in the preceding communication in this issue. A solution 30% KOH in ethylene glycol (2 mL) was prepared by degassing with argon for 5 minutes and heating to  $100\text{ }^{\circ}\text{C}$ . The solution was added to a vial containing the nitrile (100 mg) and a stir bar. The vial was sealed and heated to  $160\text{ }^{\circ}\text{C}$  for 18 h. The viscous solution was allowed to cool and added to a mixture of 1N HCl (100 mL) and  $\text{CH}_2\text{Cl}_2$  (100 mL). The layers were separated and the aqueous layer was extracted with  $\text{CH}_2\text{Cl}_2$  (2 x 50 mL). The combined organic layers were dried with  $\text{Na}_2\text{SO}_4$  and concentrated. The material could be used without further purification and the spectral data matched the material described here. This hydrolysis reaction also provides the stereochemical assignment of **25** and **26**, as the assignment of the tertiary nitrile starting material was secured by X-ray crystallography of a synthetic precursor.

Hz, 1H), 1.81 (m, 1H), 1.52 (m, 5H), 1.38 (m, 2H), 1.18 (s, 3H), 1.08 (m, 1H), 0.97 (s, 3H), 0.79 (s, 3H); <sup>13</sup>C NMR (C<sub>6</sub>D<sub>6</sub>e, 125 MHz) δ 186.1, 151.7, 116.0, 55.8, 54.7, 53.1, 37.9, 36.7, 36.3, 35.7, 33.9, 29.1, 26.1, 25.8, 23.2; IR (thin film) 2955, 1690, 1453, 1365 cm<sup>-1</sup>; HRMS (ESI/TOF) calculated for C<sub>15</sub>H<sub>24</sub>O<sub>2</sub> (M-H) 235.1698, observed 235.1697; [α]<sub>D</sub><sup>24</sup> +61.5° [α]<sub>577</sub><sup>24</sup> +63.8°, [α]<sub>546</sub><sup>24</sup> +72.5°, [α]<sub>435</sub><sup>24</sup> 147.8°, [α]<sub>405</sub><sup>24</sup> +189.9° (c = 1.0, CH<sub>2</sub>Cl<sub>2</sub>).

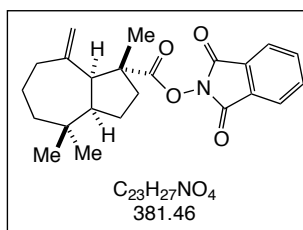

**(1R,3aR,8aS)-1,3-dioxoisindolin-2-yl 1,4,4-trimethyl-8-methylenedecahydroazulene-1-carboxylate (27):** To a solution of **26** (0.10 g, 0.43 mmol) in THF (2 mL) was added *N*-hydroxyphthalimide (120 mg, 0.72 mmol), *N,N'*-dicyclohexylcarbodiimide (130 mg, 0.64 mmol) and 4-dimethylaminopyridine (2.6 mg, 0.021 mmol). The mixture was stirred for 18 h, filtered, and concentrated under reduced pressure. The residue was quickly purified by column chromatography (SiO<sub>2</sub>, 0–5% ethyl acetate/hexanes) to afford **27** as a white solid (135 mg, 84%): m.p. 96–97 °C; R<sub>f</sub>: 0.26 (10% ethyl acetate/hexanes);

<sup>1</sup>H NMR (CDCl<sub>3</sub>, 500 MHz, for major isomer) δ 7.86 (dd, *J* = 3.0, 5.4 Hz, 2H), 7.76 (dd, *J* = 3.0, 5.4 Hz, 2H), 4.95 (s, 1H), 4.81 (s, 1H), 3.34 (d, *J* = 7.9 Hz, 1H), 2.47 (m, 1H), 2.35 (dd, *J* = 4.8, 12.2 Hz, 1H), 2.22 (apt q, *J* = 10.4 Hz, 1H), 1.79 (m, 6H), 1.38 (m, 1H), 1.31 (s, 3 H), 1.26 (m, 1H), 1.02 (s, 3H), 0.92 (s, 3H); <sup>13</sup>C NMR (CDCl<sub>3</sub>, 125 MHz) δ 175.1, 162.4, 150.5, 134.8, 129.2, 124.0, 116.8, 55.8, 53.7, 52.8, 37.7, 36.8, 36.2, 35.8, 33.9, 28.7, 26.0, 25.4, 22.4; IR (thin film) 2925, 1779, 1744, 1364, 1034 cm<sup>-1</sup>; HRMS (ESI/TOF) calculated for C<sub>23</sub>H<sub>27</sub>NO<sub>4</sub> (M+Na) 404.1838, observed 404.1836; [α]<sub>D</sub><sup>24</sup> -19.4° [α]<sub>577</sub><sup>24</sup> -21.1°, [α]<sub>546</sub><sup>24</sup> -25.3°, [α]<sub>435</sub><sup>24</sup> -43.1°, [α]<sub>405</sub><sup>24</sup> -47.3° (c = 1.0, CH<sub>2</sub>Cl<sub>2</sub>).

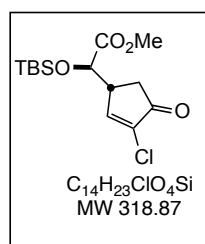

**(R)-methyl 2-(tert-butyldimethylsilyloxy)-2-((R)-3-chloro-4-oxocyclopent-2-enyl)acetate (28):** A solution of (*R*)-methyl 2-(*tert*-butyldimethylsilyloxy)-2-((*R*)-4-oxocyclopent-2-enyl)ethanoate (500 mg, 1.76 mmol)<sup>9</sup> in CH<sub>2</sub>Cl<sub>2</sub> (18 mL) was cooled to 0 °C and Et<sub>4</sub>NCl<sub>3</sub> (620 mg, 2.7 mmol)<sup>10</sup> was added. The yellow solution was stirred for 20 min and

concentrated. The residue was purified by column chromatography (SiO<sub>2</sub>, 10–20% ethyl acetate/hexanes) to afford the desired enone **28** as a clear oil (465 mg, 83%): R<sub>f</sub>: 0.26 (10% Ethyl

<sup>9</sup> M. J. Schnermann, L. E. Overman, *J. Am. Chem. Soc.* **2011**, *133*, 16425.

<sup>10</sup> Prepared according to: T. Schlama, K. Gabriel, V. Gouverneur, C. Mioskowski, *Angew. Chem., Int. Ed.* **1997**, *36*, 2342; *Angew. Chem.* **1997**, *109*, 2440.

acetate/hexanes);  $^1\text{H}$  NMR ( $\text{CDCl}_3$ , 500 MHz, for major isomer)  $\delta$  7.44 (d, 1H,  $J = 2.8$  Hz), 4.19 (d, 1H,  $J = 5.4$  Hz), 3.76 (s, 3H), 3.33 (m, 1H), 2.60 (dd, 1H,  $J = 6.7, 18.6$  Hz), 2.38 (dd, 1H,  $J = 2.1, 18.6$  Hz), 0.86 (s, 9H), 0.05 (s, 3H), 0.03 (s, 3H);  $^{13}\text{C}$  NMR ( $\text{CDCl}_3$ , 125 MHz)  $\delta$  199.5, 172.1, 156.0, 137.4, 73.4, 52.4, 42.7, 36.5, 25.7, 18.3, -4.8, -5.3; IR (thin film) 2954, 1731, 1257, 1130  $\text{cm}^{-1}$ ; HRMS (ESI/TOF) calculated for  $\text{C}_{14}\text{H}_{23}\text{ClO}_4\text{Si}$  ( $\text{M}+\text{Na}$ ) 341.0952, observed 341.0953;  $[\alpha]_{\text{D}}^{24} +72.8^\circ$ ,  $[\alpha]_{577}^{24} +75.0^\circ$ ,  $[\alpha]_{546}^{24} +80.2^\circ$ ,  $[\alpha]_{435}^{24} +142.8^\circ$ ,  $[\alpha]_{405}^{24} +163.8^\circ$ , ( $c = 0.6, \text{CHCl}_3$ ).

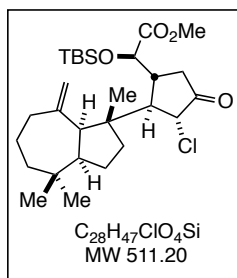

**(R)-methyl 2-(tert-butyldimethylsilyloxy)-2-((1R,2R,3R)-3-chloro-4-oxo-2-((1R,3aR,8aS)-1,4,4-trimethyl-8-methylenedecahydroazulen-1-yl)cyclopentyl)acetate (30):** To a 1 dram vial containing **27** (50 mg, 0.13 mmol), **28** (61 mg, 0.20 mmol), diethyl 1,4-dihydro-2,6-dimethyl-3,5-

pyridinedicarboxylate (49 mg, 0.20 mmol) was added degassed methylene chloride (730  $\mu\text{L}$ , Ar sparged),  $i\text{Pr}_2\text{EtN}$  (44  $\mu\text{L}$ , 0.29 mmol) and a 0.01 M solution of  $\text{Ru}(\text{bpy})_3\text{BF}_4$  in  $\text{CH}_2\text{Cl}_2$  (130  $\mu\text{L}$ , 0.0013 mmol).<sup>11</sup> The resulting red mixture was stirred surrounded by a blue LED strip as above for 2.5 h until **27** was consumed (TLC monitoring). Hexanes (1 mL) was added to the mixture and then the mixture was loaded on a  $\text{SiO}_2$  column (10 g, equilibrated with hexanes). The column was quickly eluted with 5% ethyl acetate/hexanes to afford **30** as a white solid (41 mg, 61%): Rf: 0.32 (10% ethyl acetate/hexanes);

$^1\text{H}$  NMR ( $\text{CDCl}_3$ , 500 MHz, for major isomer)  $\delta$  4.92 (s, 1H), 4.84 (s, 1H), 4.19 (d,  $J = 6.0$  Hz, 1H), 3.93 (d,  $J = 3.5$  Hz, 1H), 3.34 (s, 3H), 2.77 (d,  $J = 3.1$  Hz, 1H), 2.69 (d,  $J = 8.9$  Hz, 1H), 2.60 (m, 1H), 2.16 (m, 3H), 1.62 (m, 3H), 1.58 (m, 2H), 1.45 (m, 1H), 1.20 (m, 2H), 1.10 (s, 3H), 1.01 (s, 9H), 0.91 (s, 3H), 0.82 (m, 1H), 0.55 (s, 3H), 0.14 (s, 3H), 0.12 (s, 3H);  $^{13}\text{C}$  NMR ( $\text{CDCl}_3$ , 125 MHz)  $\delta$  207.9, 172.8, 154.7, 115.1, 76.9, 60.2, 56.1, 55.6, 54.0, 51.6, 50.0, 40.5, 40.0, 38.3, 38.2, 37.5, 36.6, 34.7, 29.3, 26.5, 26.25, 26.15, 26.1, 20.5, 18.8, -4.8, -4.9; IR (thin film) 2852, 1755, 1258, 1148  $\text{cm}^{-1}$ ; HRMS (ESI/TOF) calculated for  $\text{C}_{28}\text{H}_{47}\text{ClO}_4\text{Si}$  ( $\text{M}+\text{Na}$ ) 533.2830, observed 533.2821;  $[\alpha]_{\text{D}}^{24} +41.6^\circ$ ,  $[\alpha]_{577}^{24} +42.8^\circ$ ,  $[\alpha]_{546}^{24} +48.1^\circ$ ,  $[\alpha]_{435}^{24} +86.5^\circ$ ,  $[\alpha]_{405}^{24} +97.6^\circ$  ( $c = 1.0, \text{CH}_2\text{Cl}_2$ ). X-ray quality crystals (mp 116-117  $^\circ\text{C}$ ) of **30** were obtained by dissolving in ethyl acetate and exposing to heptane vapor.

<sup>11</sup> The 0.01 M solution of  $\text{Ru}(\text{bpy})_3(\text{BF}_4)_2$  was prepared by adding  $\text{Ru}(\text{bpy})_3\text{Cl}_2$  (7.4 mg, 0.010 mmol) to 1 mL  $\text{CH}_2\text{Cl}_2$  and 1 mL saturated aqueous  $\text{NaBF}_4$  and agitating the resulting mixture for 2 min. The organic layer was passed through a short plug of  $\text{Na}_2\text{SO}_4$  and used without further purification.

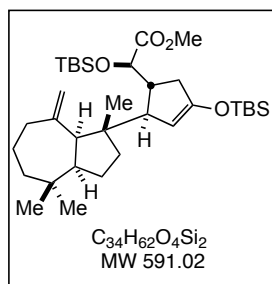

**(R)-methyl 2-(tert-butyldimethylsilyloxy)-2-((1R,2S)-4-(tert-butyldimethylsilyloxy)-2-((1S,3aR,8aS)-1,4,4-trimethyl-8-methylenedecahydroazulen-1-yl)cyclopent-3-enyl)acetate (8):**

A 0.2 M solution of  $Me_2CuCNLi_2$  in  $Et_2O$  (~10 mL) was prepared by addition of 1.5 M  $MeLi$  in  $Et_2O$  (2.7 mL, 4.0 mmol) to a stirred mixture of  $CuCN$  (180 mg, 2.0 mmol) in  $Et_2O$  (7.5 mL) at 0 °C to form a clear homogenous solution. To a flask at -20 °C containing  $TBSCl$  (60 mg, 0.40 mmol) was added  $THF$  (0.20 mL),  $HMPA$  (0.20 mL), and 0.2 M  $Me_2CuCNLi_2$  in  $Et_2O$  (0.80 mL, 0.16 mmol) to form a clear homogenous solution. A solution of **30** (41 mg, 0.080 mmol) in  $THF$  (0.20 mL) was added slowly to generate a persistent yellow solution. After 1 h, 10:1 saturated  $NH_4Cl/NH_4OH$  (5 mL) was added to the solution and  $Et_2O$  (5 mL) and the layers were separated. The aqueous layer was washed with additional  $Et_2O$  ( $2 \times 5$  mL). The organic phases were combined, dried over  $Na_2SO_4$ , filtered, and concentrated. The residue was purified by column chromatography ( $SiO_2$ , 1–2% ethyl acetate/hexanes) to afford **8** (36 mg, 76%) that matched the material prepared previously by  $^1H$  and  $^{13}C$  NMR.<sup>9</sup>

## Stereochemical Assignments

### *rac*-1-methyl-*cis*-octahydropentalene-1-*endo*-carbonitrile (S2):

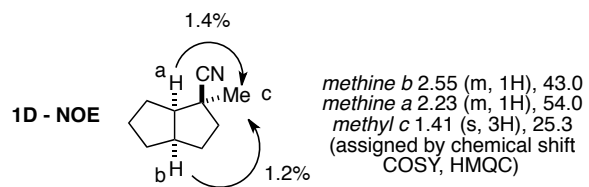

**X-ray Structure of 30 (CCDC 885482):**

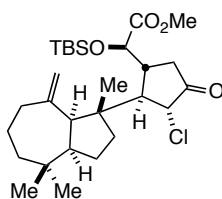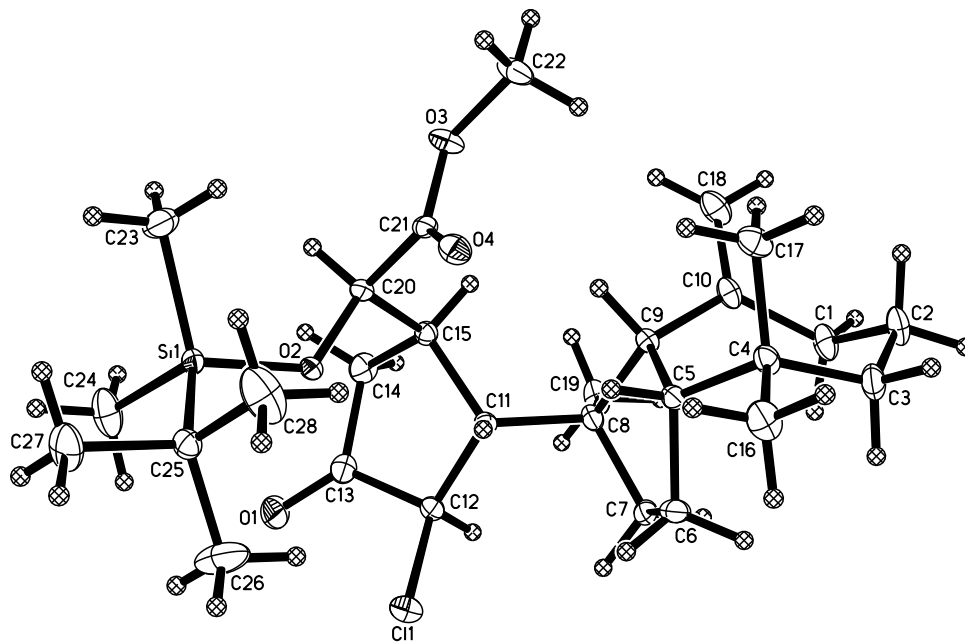

**<sup>1</sup>H spectrum**

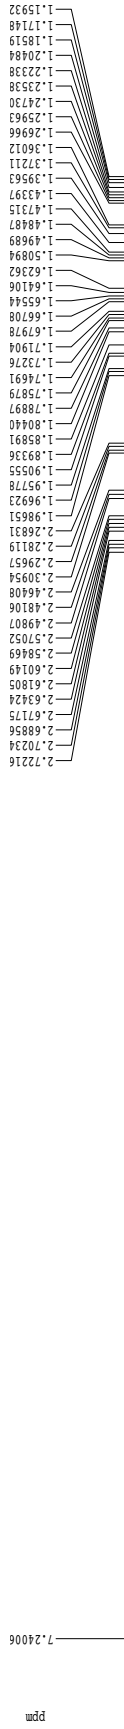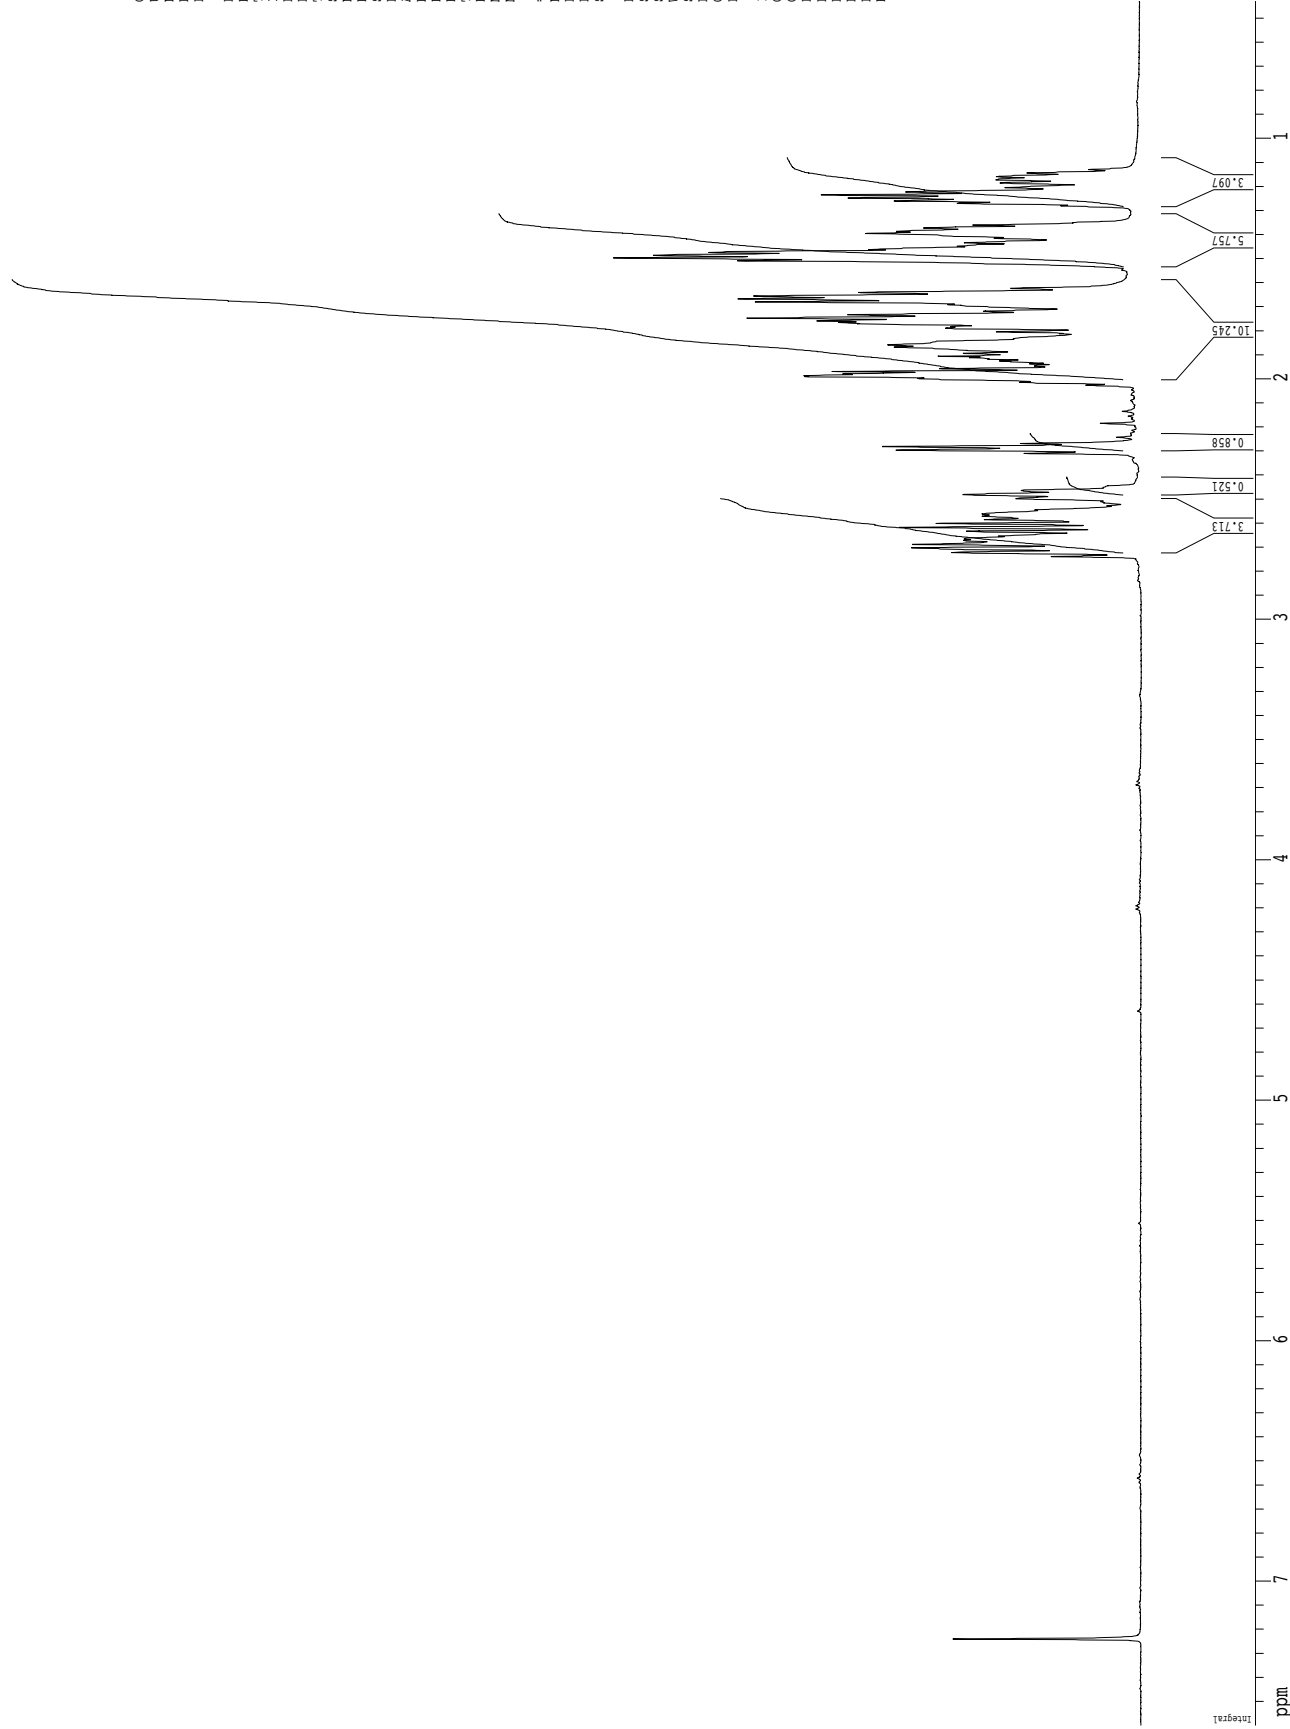

Current Data Parameters  
 USER schner  
 NAME mjs4-132-3c13  
 EXPNO 1  
 PROCNO 1  
 F2 - Acquisition Parameters  
 Date\_ 20111214  
 Time 14.17  
 INSTRUM cryo500  
 PROBHD 5 mm CPXI H-  
 PULPROG zg30  
 TD 81728  
 SOLVENT CDCl3  
 NS 4  
 DS 2  
 SWH 8012.820 Hz  
 FIDRES 0.098043 Hz  
 AQ 5.0998774 sec  
 RG 327  
 DR 62.600 usec  
 DE 288.0 K  
 TE 0.10000000 sec  
 D1 0.00000000 sec  
 MCREST 0.00000000 sec  
 MCWRR 0.01500000 sec  
 ===== CHANNEL f1 =====  
 NUC1 1H  
 P1 7.50 usec  
 PL1 1.60 dB  
 SFO1 500.2235015 MHz  
 F2 - Processing parameters  
 SI 32768  
 SF 500.2198864 MHz  
 EQ 65535  
 MVM EM  
 SSB 0  
 LB 0.30 Hz  
 GB 0  
 PC 4.00  
 1D NMR plot parameters  
 CX 22.80 cm  
 CY 7.00 cm  
 FIP 7.589 ppm  
 F2 3901.09 Hz  
 F3 16.50 Hz  
 F4 215.91 Hz  
 PRMCM 0.31435 ppm/cm  
 HZCM 157.24455 Hz/cm

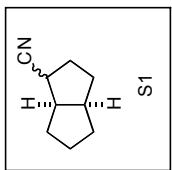

Z-restored spin-echo <sup>13</sup>C spectrum with <sup>1</sup>H decoupling

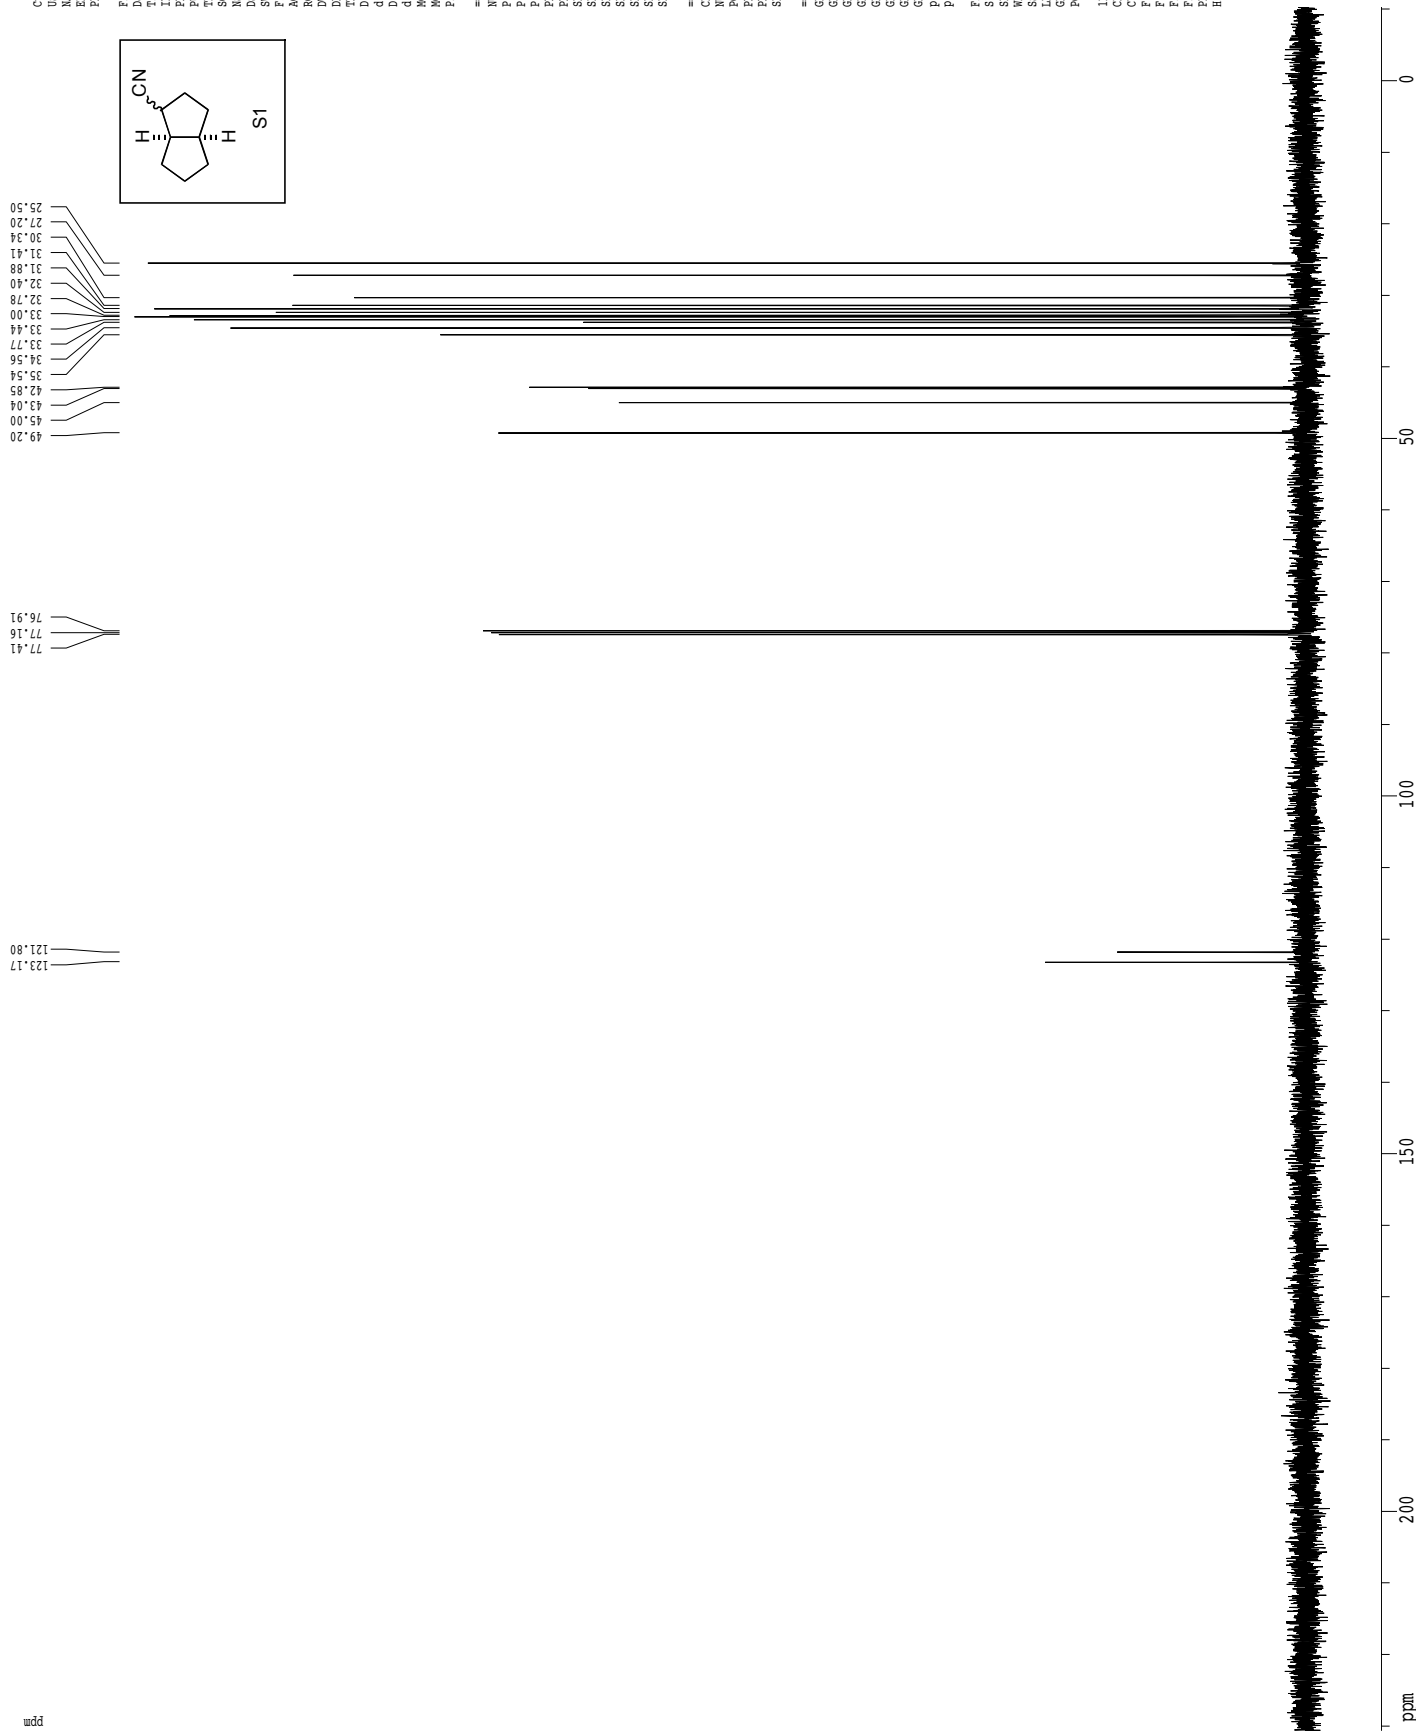



1H spectrum

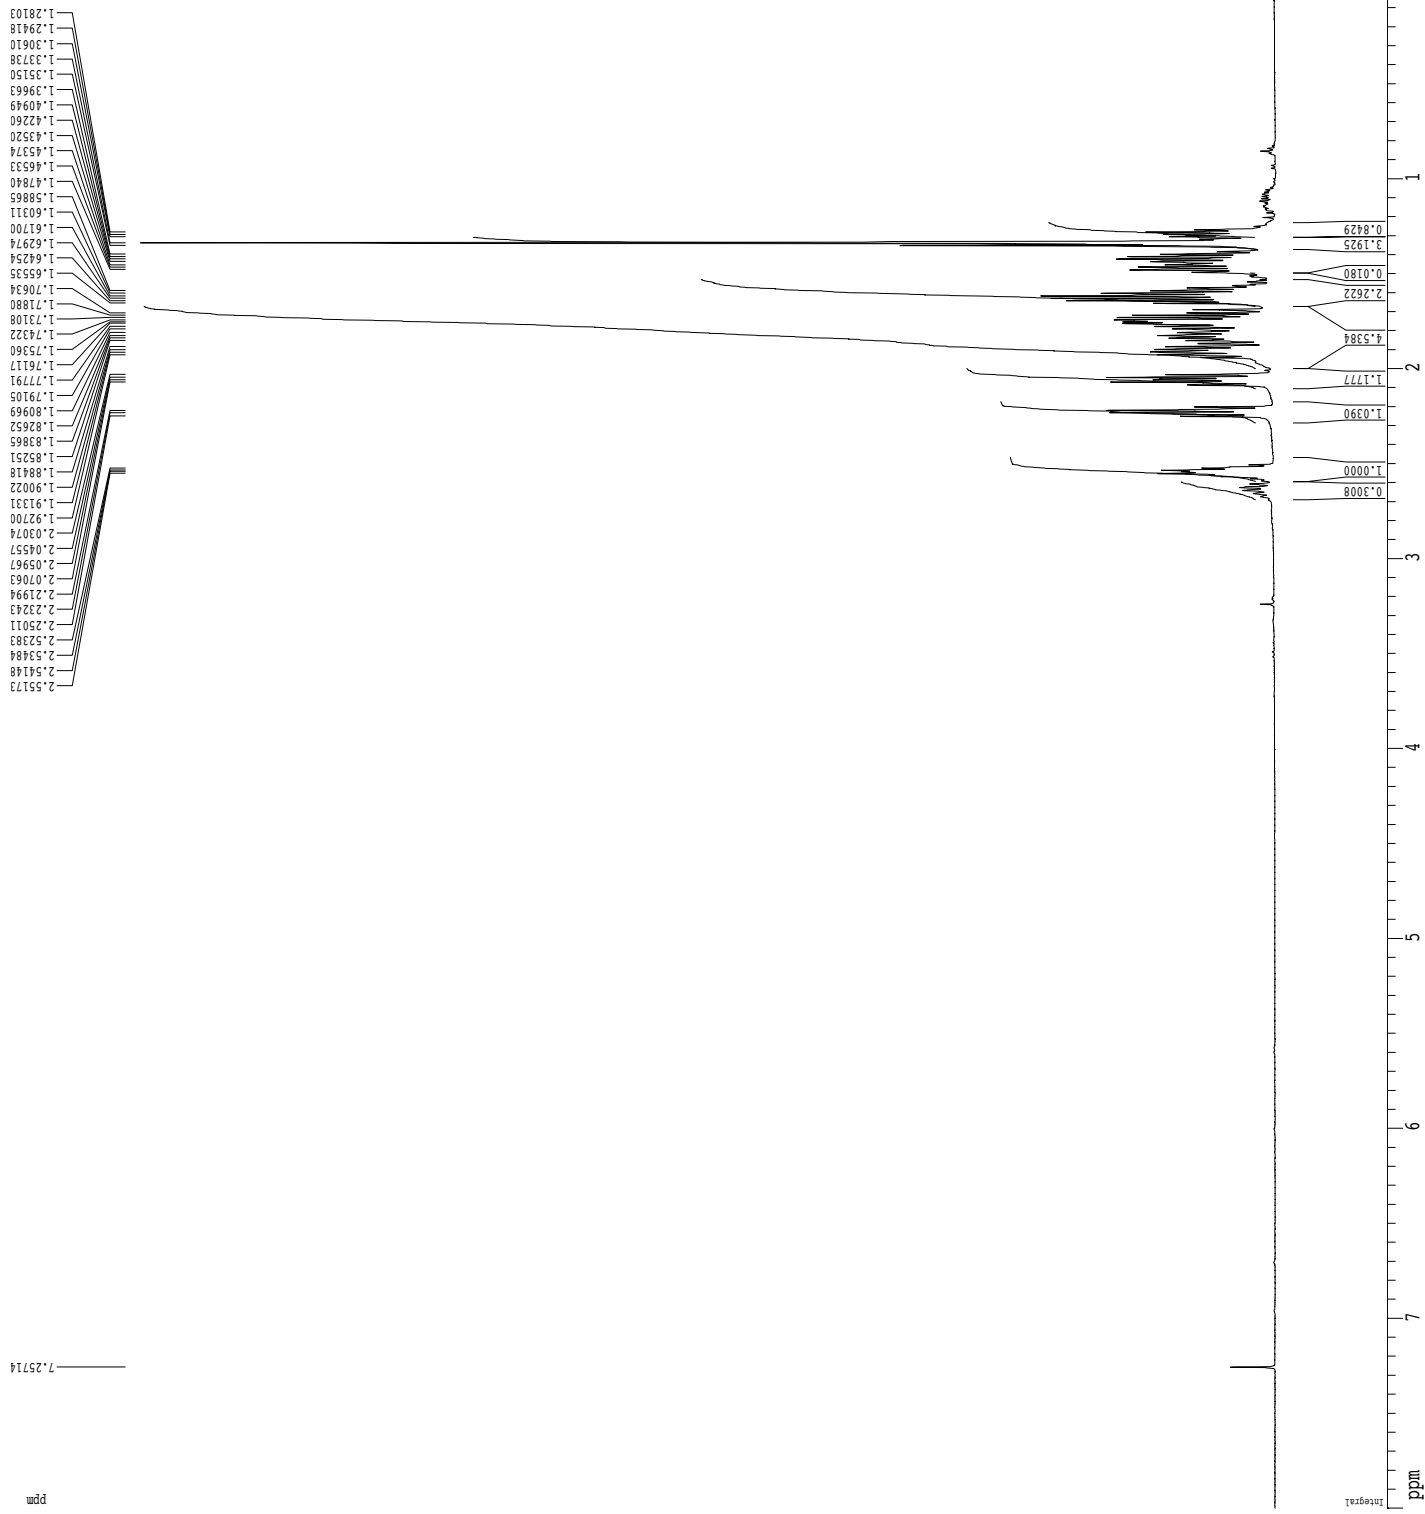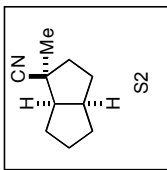

Current Data Parameters  
 USER schner  
 NAME mjs4-121-3  
 EXPNO 1  
 PROCNO 1

F2 - Acquisition Parameters  
 Date\_ 201101  
 Time 13.45  
 INSTRUM cryo500  
 PROBHD 5 mm CPXI 1H-  
 PULPROG zg30  
 TD 81728  
 SOLVENT CDCl3  
 NS 6  
 DS 2  
 SWH 8012.820 Hz  
 FIDRES 0.098043 Hz  
 AQ 5.0990774 sec  
 RG 32  
 DW 6.00 usec  
 DE 6.00 usec  
 TE 288.0 K  
 D1 0.1000000 sec  
 MCREST 0.0000000 sec  
 MCWPK 0.0150000 sec

==== CHANNEL f1 =====  
 NUC1 1H  
 P1 7.50 usec  
 PL1 1.00 dB  
 SFO1 500.2235015 MHz

F2 - Processing parameters  
 SI 65535  
 SF 500.220324 MHz  
 GPCSS 1  
 MDW EM  
 SSB 0  
 LB 0.30 Hz  
 GB 0  
 PC 4.00

1D NMR plot parameters  
 CX 22.80 cm  
 CY 15.00 cm  
 FIP 8.000 ppm  
 F2 4001.76 Hz  
 F3 4001.76 Hz  
 F4 -537.50 ppm  
 PRGM 0.38799 ppm/cm  
 HZCM 199.08173 Hz/cm

Z-restored spin-echo 13C spectrum with 1H decoupling

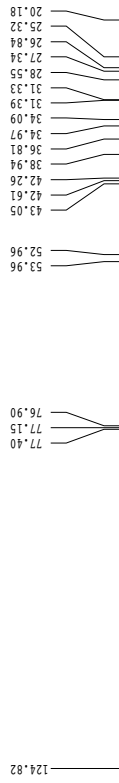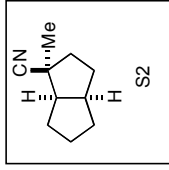

Current Data Parameters  
 USER Schmei  
 EXPNO mjs4-121-2  
 PROCNO 1

F2 - Acquisition Parameters  
 Date\_ 20111011  
 Time 13.48  
 INSTRUM cryo500  
 PROBHD 5 mm CPAC1 1H  
 PULPROG zgpg30  
 TD 65536  
 SOLVENT CDCl3  
 NS 74  
 DS 16  
 SWH 30303.031 Hz  
 FIDRES 0.462388 Hz  
 AQ 1.0813940 sec  
 RG 5100.6  
 DW 6.00 usec  
 DE 6.00 usec  
 TE 298.2 K  
 D1 0.25000000 sec  
 d11 0.03000000 sec  
 D16 0.00020000 sec  
 d17 0.00015600 sec  
 ACRESF 0.00000000 sec  
 ACWRK 0.01500000 sec  
 F2 3.00 usec

===== CHANNEL F1 =====  
 NUC1 13C  
 P1 15.50 usec  
 P11 500.00 usec  
 P12 2000.00 usec  
 PL0 120.00 dB  
 PL1 125.784568 Hz  
 SP1 5.20 dB  
 SP2 3.20 dB  
 SFO1 Cpp60.05, 20.1  
 SFO2 Cpp60comp.4  
 SFOFF1 0.00 Hz  
 SFOFF2 0.00 Hz

===== CHANNEL F2 =====  
 CDPREG wd\*615  
 NUC2 1H  
 PCPD2 100.00 usec  
 PL2 1.60 dB  
 PL12 24.60 dB  
 SFO2 500.2225011 MHz

===== GRADIENT CHANNEL =====  
 GBR1 0.00 %  
 GBR2 0.00 %  
 GBR3 0.00 %  
 GBR4 0.00 %  
 GBR5 30.00 %  
 GBR6 50.00 %  
 P15 500.00 usec  
 P16 1000.00 usec

F2 - Processing parameters  
 SI 65536  
 SF 125.7804190 MHz  
 WDW EM  
 SSB 0  
 LB 1.00 Hz  
 GB 0  
 FC 2.00

ID NMR plot parameters  
 CX 22.80 cm  
 CY 15.65 cm  
 FIP 230.637 ppm  
 F1 29005.68 Hz  
 F2 -10.287 ppm  
 FZ -129.596 Hz  
 GAMMA 14.508 ppm/cm  
 HPCX 1329.10706 Hz/cm

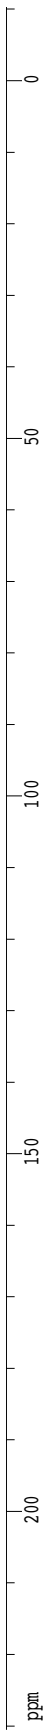

ppm

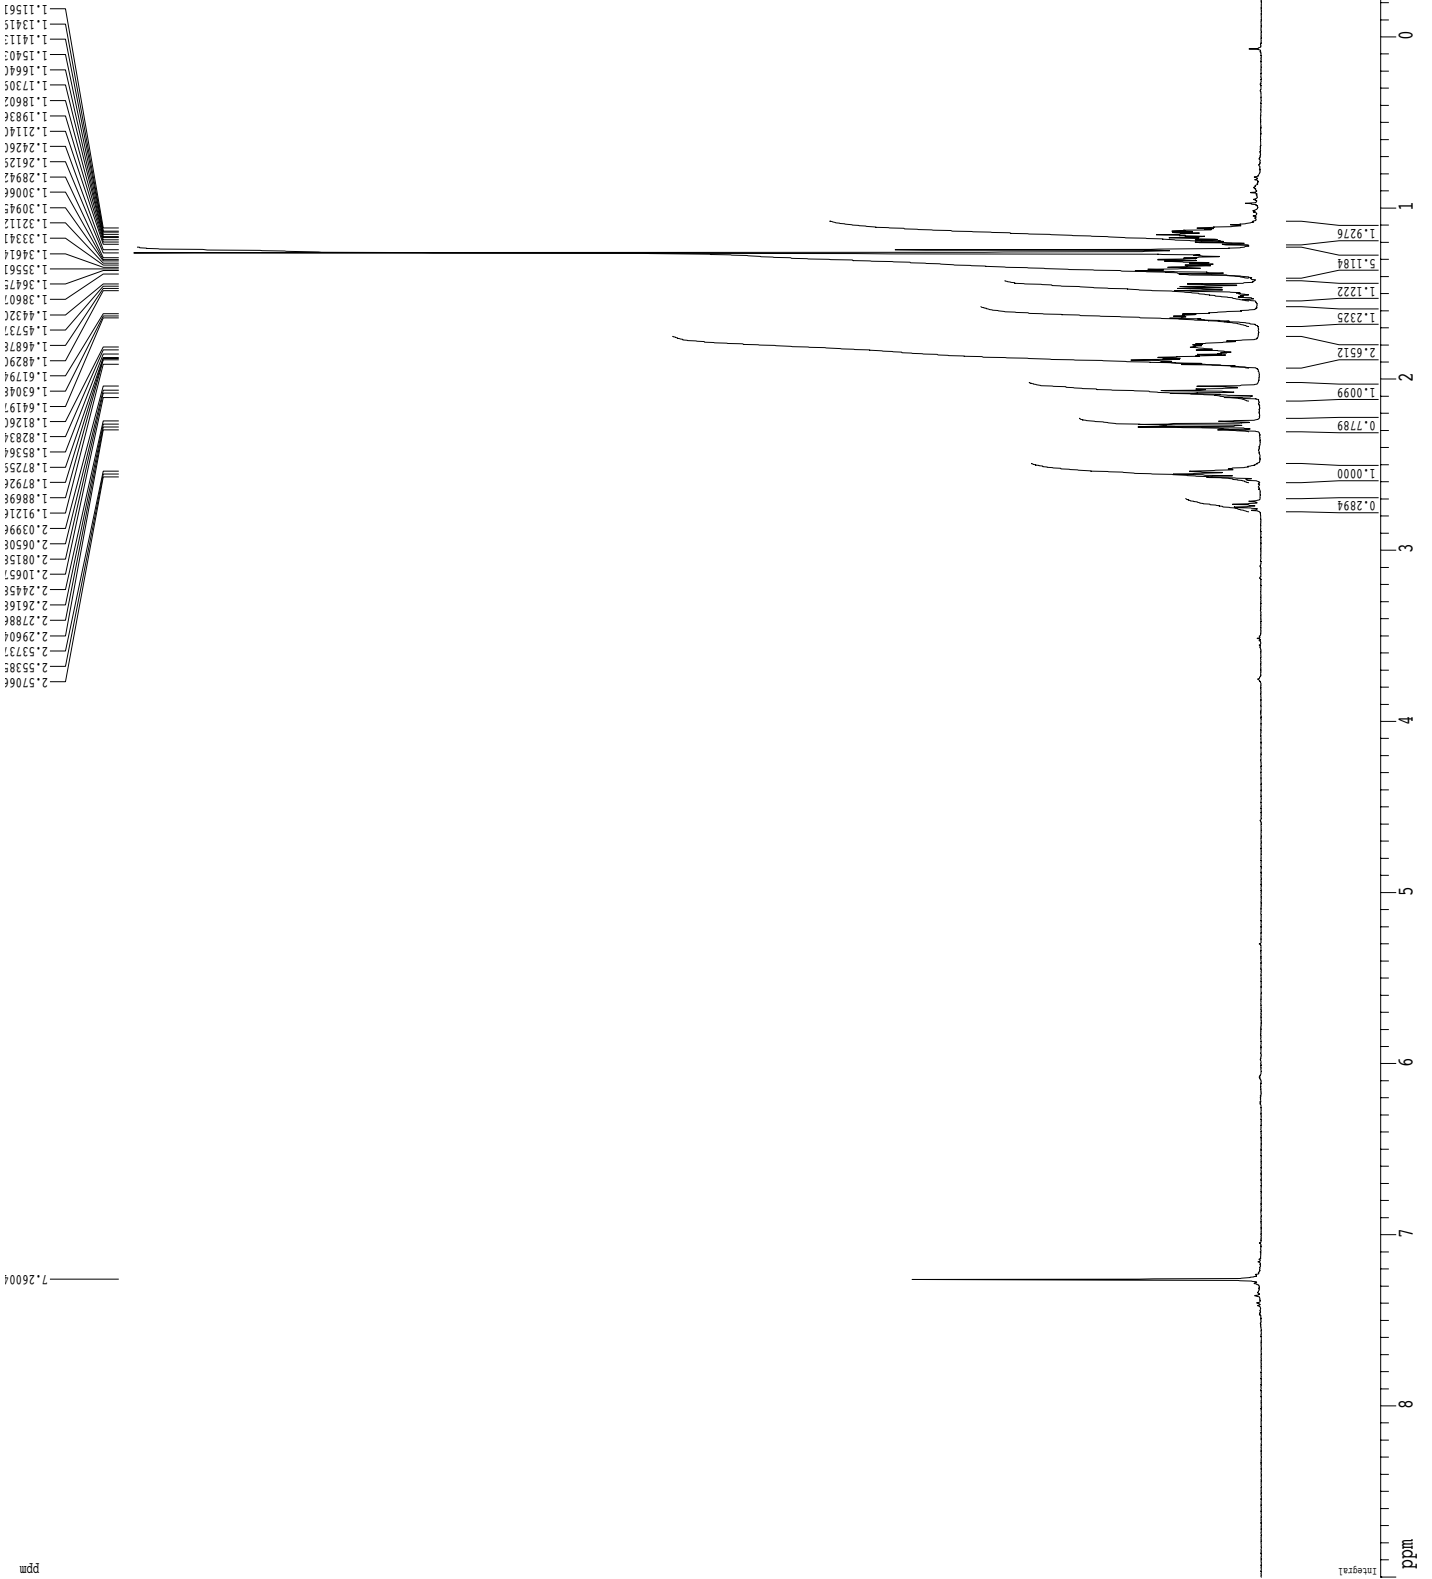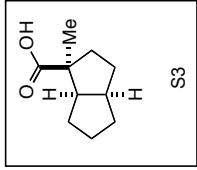

Current Data Parameters  
 USER schner  
 NAME ms4-127a-3c13  
 EXPNO 1  
 PROCNO 1

F2 - Acquisition Parameters  
 Date\_ 20111014  
 Time 10.04  
 NS 1024  
 DS 2  
 SWH 8012.820 Hz  
 FIDRES 0.098043 Hz  
 AQ 5.0998774 sec  
 RG 4.5  
 DW 62.400 usec  
 DE 6.00 usec  
 TE 298.0 K  
 MCFRESF 0.1000000 sec  
 MCFRES 0.0000000 sec  
 MCFR 0.01500000 sec

==== CHANNEL f1 =====  
 NUCL 1H  
 P1 7.50 usec  
 PL1 1.60 dB  
 SFO1 500.2235015 MHz

F2 - Processing parameters  
 SI 65536  
 SF 500.2200312 MHz  
 WDW EM  
 SS 0  
 LB 0.30 Hz  
 GB 0  
 PC 4.00

1D NMR plot parameters  
 CX 22.80 cm  
 CY 15.00 cm  
 FIP 9.000 ppm  
 F1 4500.58 Hz  
 F2 -1.072 ppm  
 F2 -536.08 Hz  
 PRCH 0.44174 ppm/cm  
 HZCX 220.96194 Hz/cm

Z-restored spin-echo <sup>13</sup>C spectrum with <sup>1</sup>H decoupling

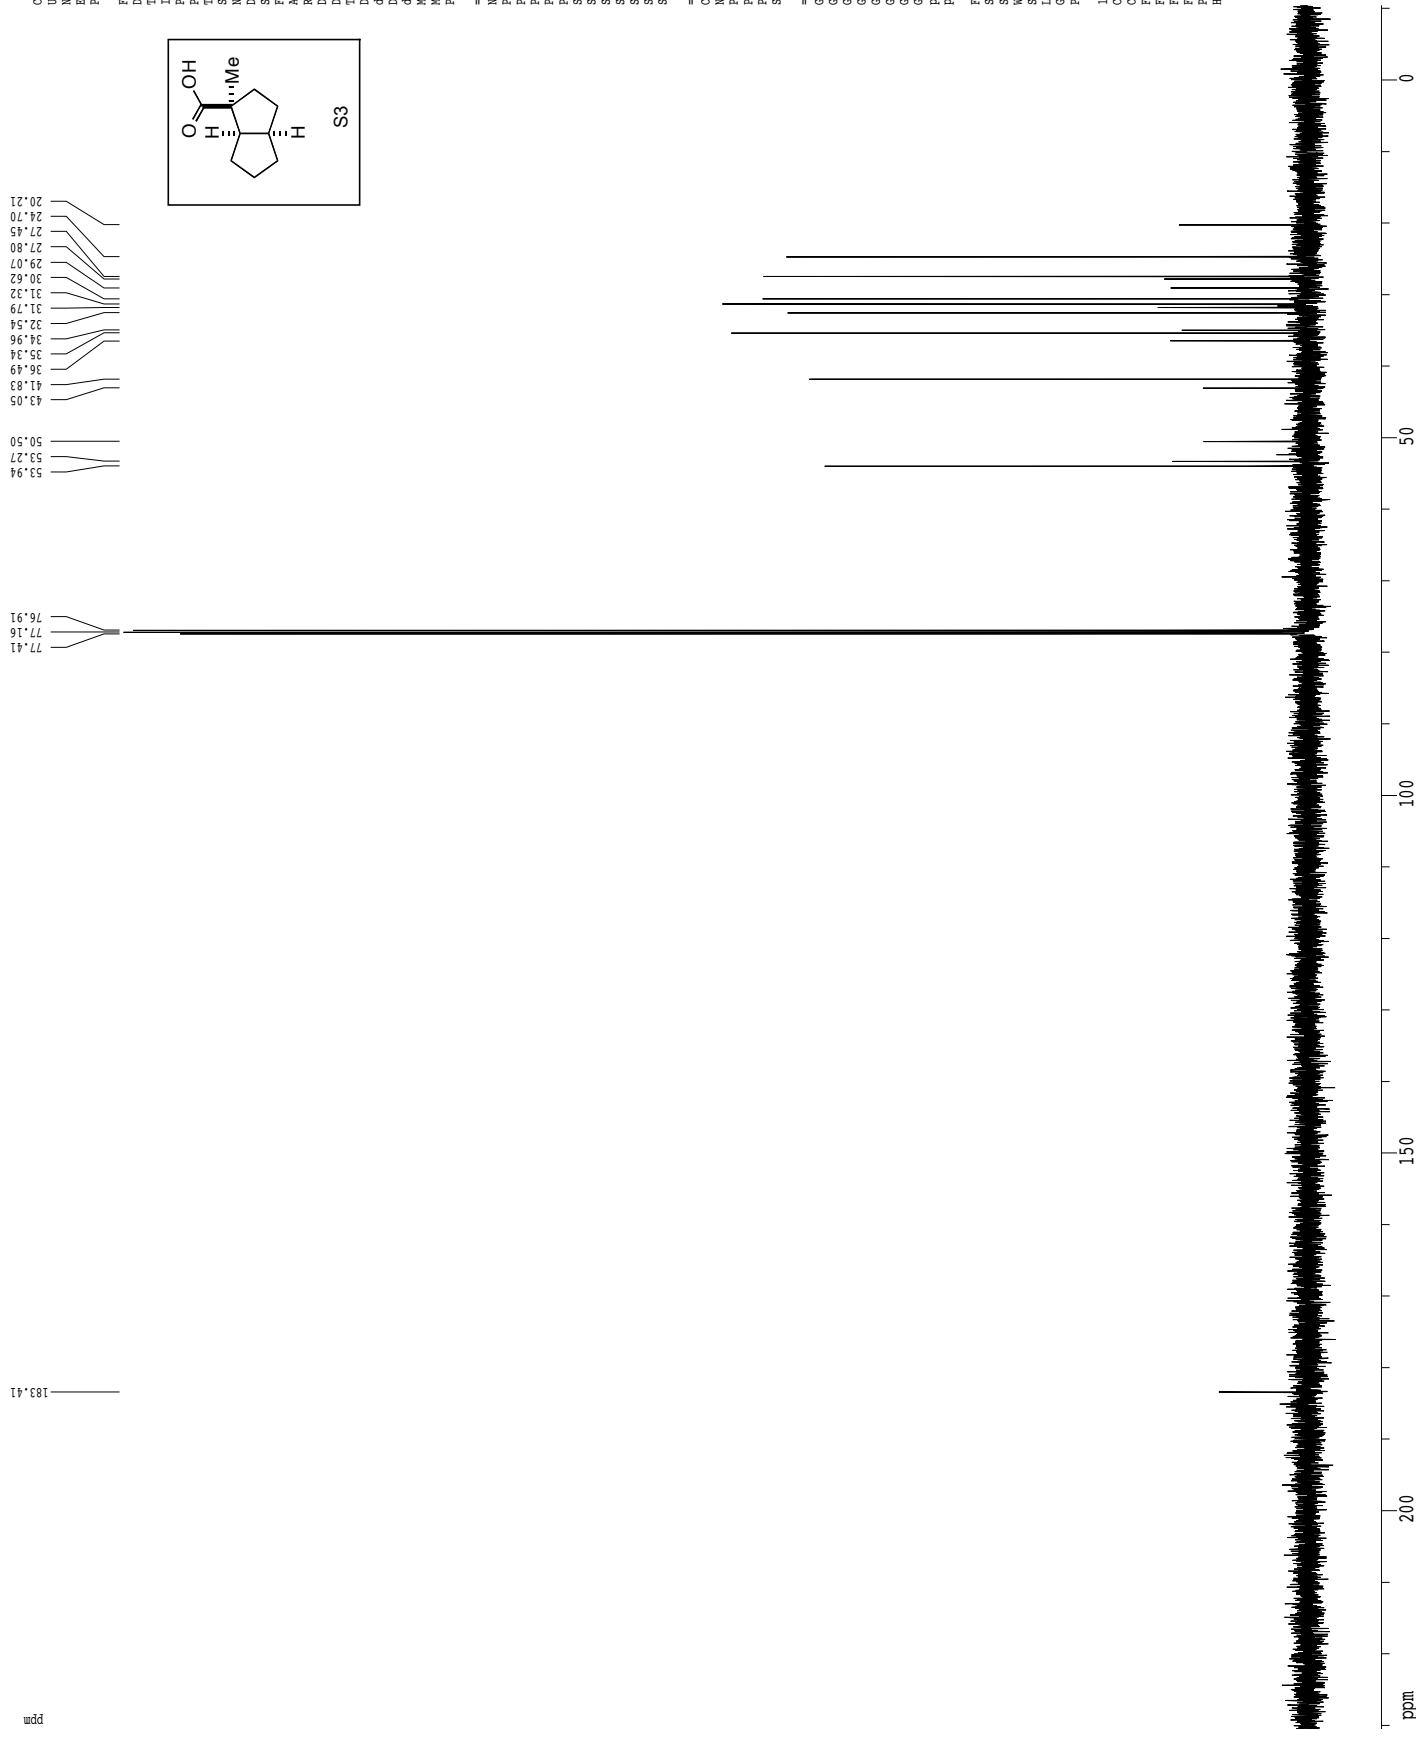

1H spectrum

ppm  
7.88667  
7.88042  
7.87593  
7.86976  
7.86860  
7.82339  
7.77782  
7.77162  
7.26001

2.65802  
2.64148  
2.62516  
2.49230  
2.47510  
2.45786  
2.44096  
2.21732  
2.20880  
2.19238  
2.18381  
2.16718  
2.09636  
2.08499  
1.97604  
1.96411  
1.94989  
1.93943  
1.93093  
1.72099  
1.70908  
1.70456  
1.69757  
1.68205  
1.67720  
1.65995  
1.64173  
1.55271  
1.47102  
1.45056  
1.43350  
1.42496  
1.40571  
1.39341  
1.38521  
1.37318  
1.36135  
1.35066  
1.34088  
1.28194  
1.26134  
1.24823  
1.23645  
1.22844  
1.21688  
1.20458

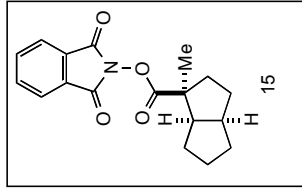

Current Data Parameters  
 USER schner  
 NAME FJ84-15B-3c13  
 EXPNO 1  
 PROCNO 1  
 F2 - Acquisition Parameters  
 Date\_ 2011219  
 Time 9.37  
 INSTRUM cryo500  
 PROBHD 5 mm CPXI 1H-  
 PULPROG zg30  
 TD 81728  
 SOLVENT CDCl3  
 NS 10  
 DS 2  
 SWH 8012.820 Hz  
 FIDRES 0.098043 Hz  
 AQ 5.0986774 sec  
 RG 62.400  
 DR 5.00 usec  
 DE 288.0 K  
 TE 0.10000000 sec  
 D1 0.00000000 sec  
 MCREST 0.00000000 sec  
 MCWRR 0.01500000 sec  
 ===== CHANNEL f1 =====  
 NUC1 1H  
 P1 7.50 usec  
 PL1 1.00 dB  
 SFO1 500.2235015 MHz  
 F2 - Processing parameters  
 SI 65536  
 SF 500.220315 MHz  
 DS 4  
 WDW EM  
 SSB 0  
 LB 0.30 Hz  
 GB 0  
 PC 4.00  
 ID NMR plot parameters  
 CX 22.80 cm  
 CY 15.00 cm  
 FIP 8.545 ppm  
 F1 4274.47 Hz  
 F2 -256.15 ppm  
 PPMCM 0.38725 ppm/cm  
 HZCM 198.71114 Hz/cm

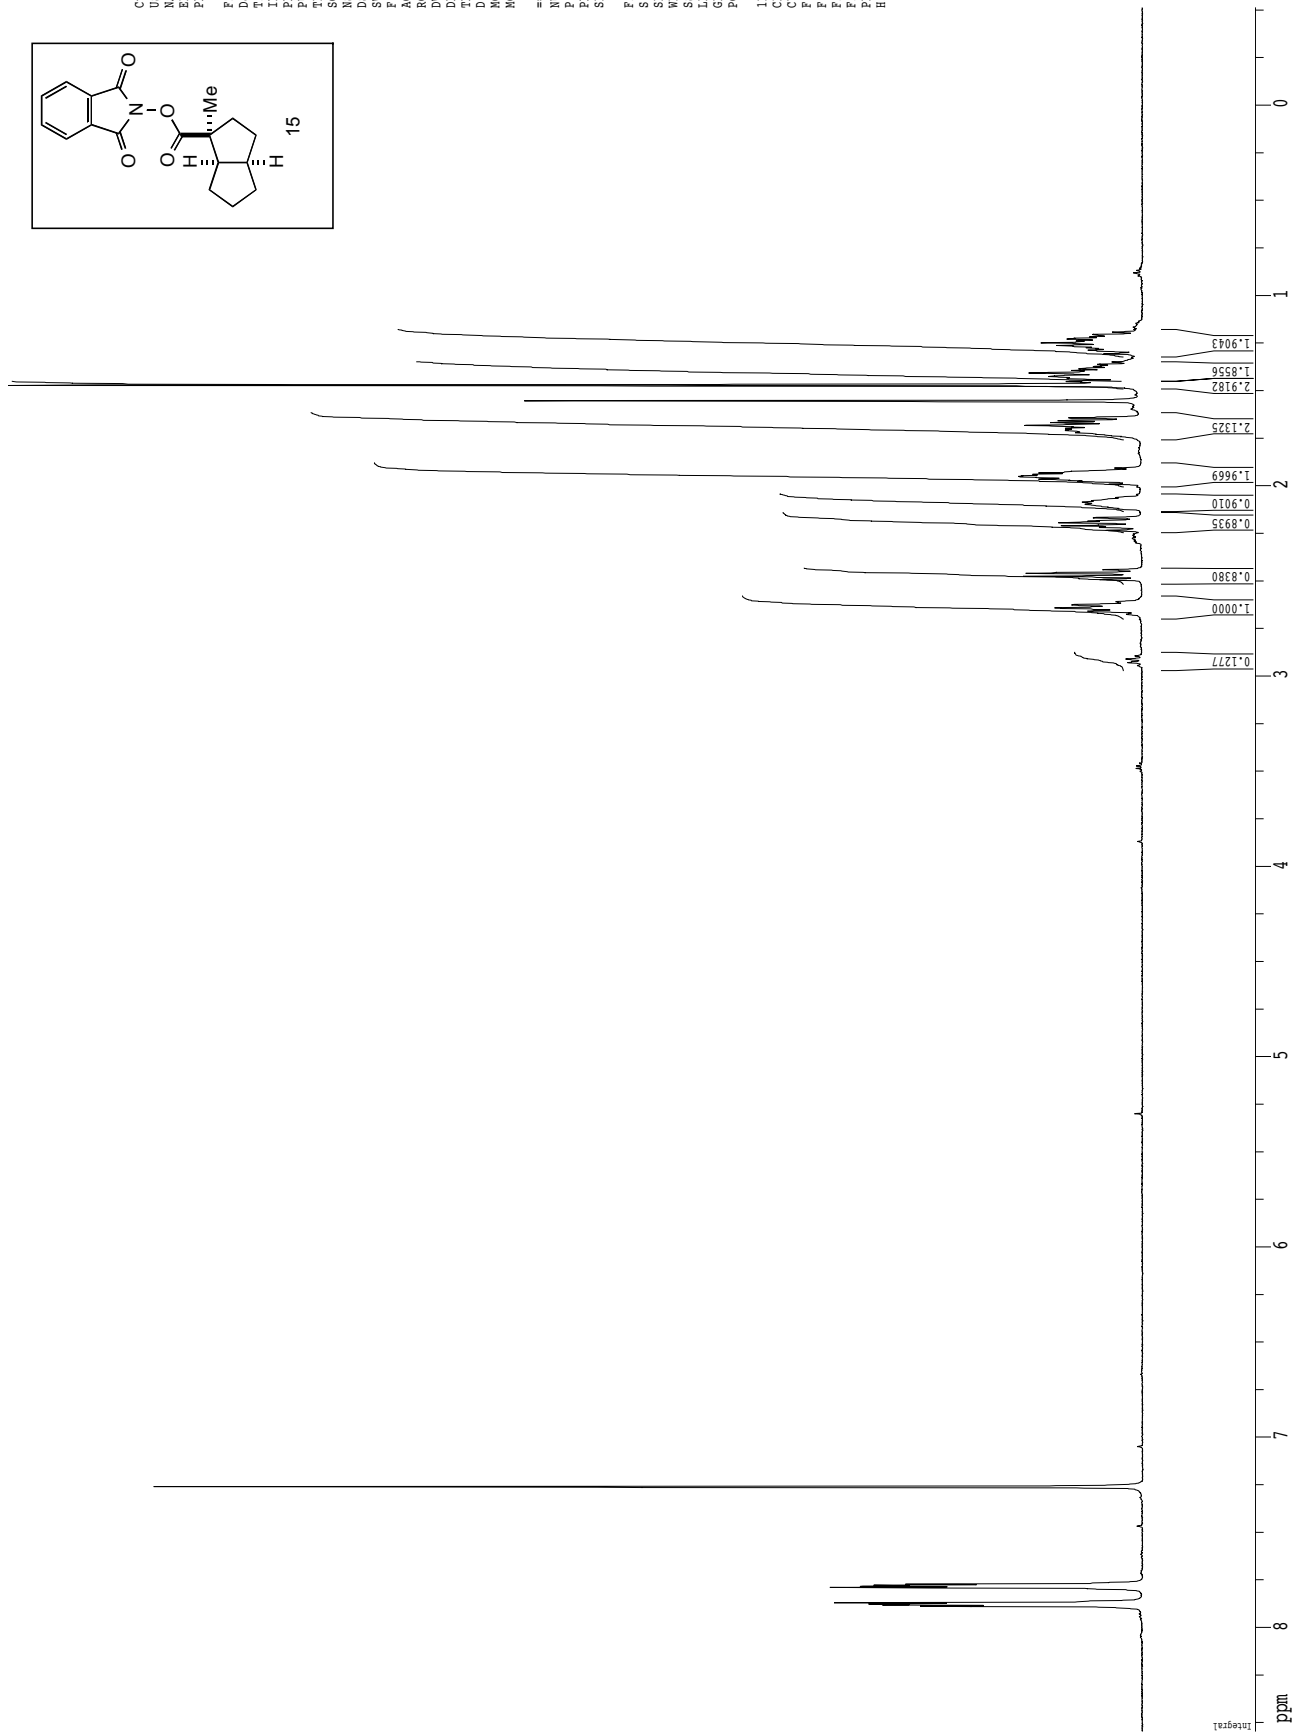

Z-restored spin-echo <sup>13</sup>C spectrum with <sup>1</sup>H decoupling

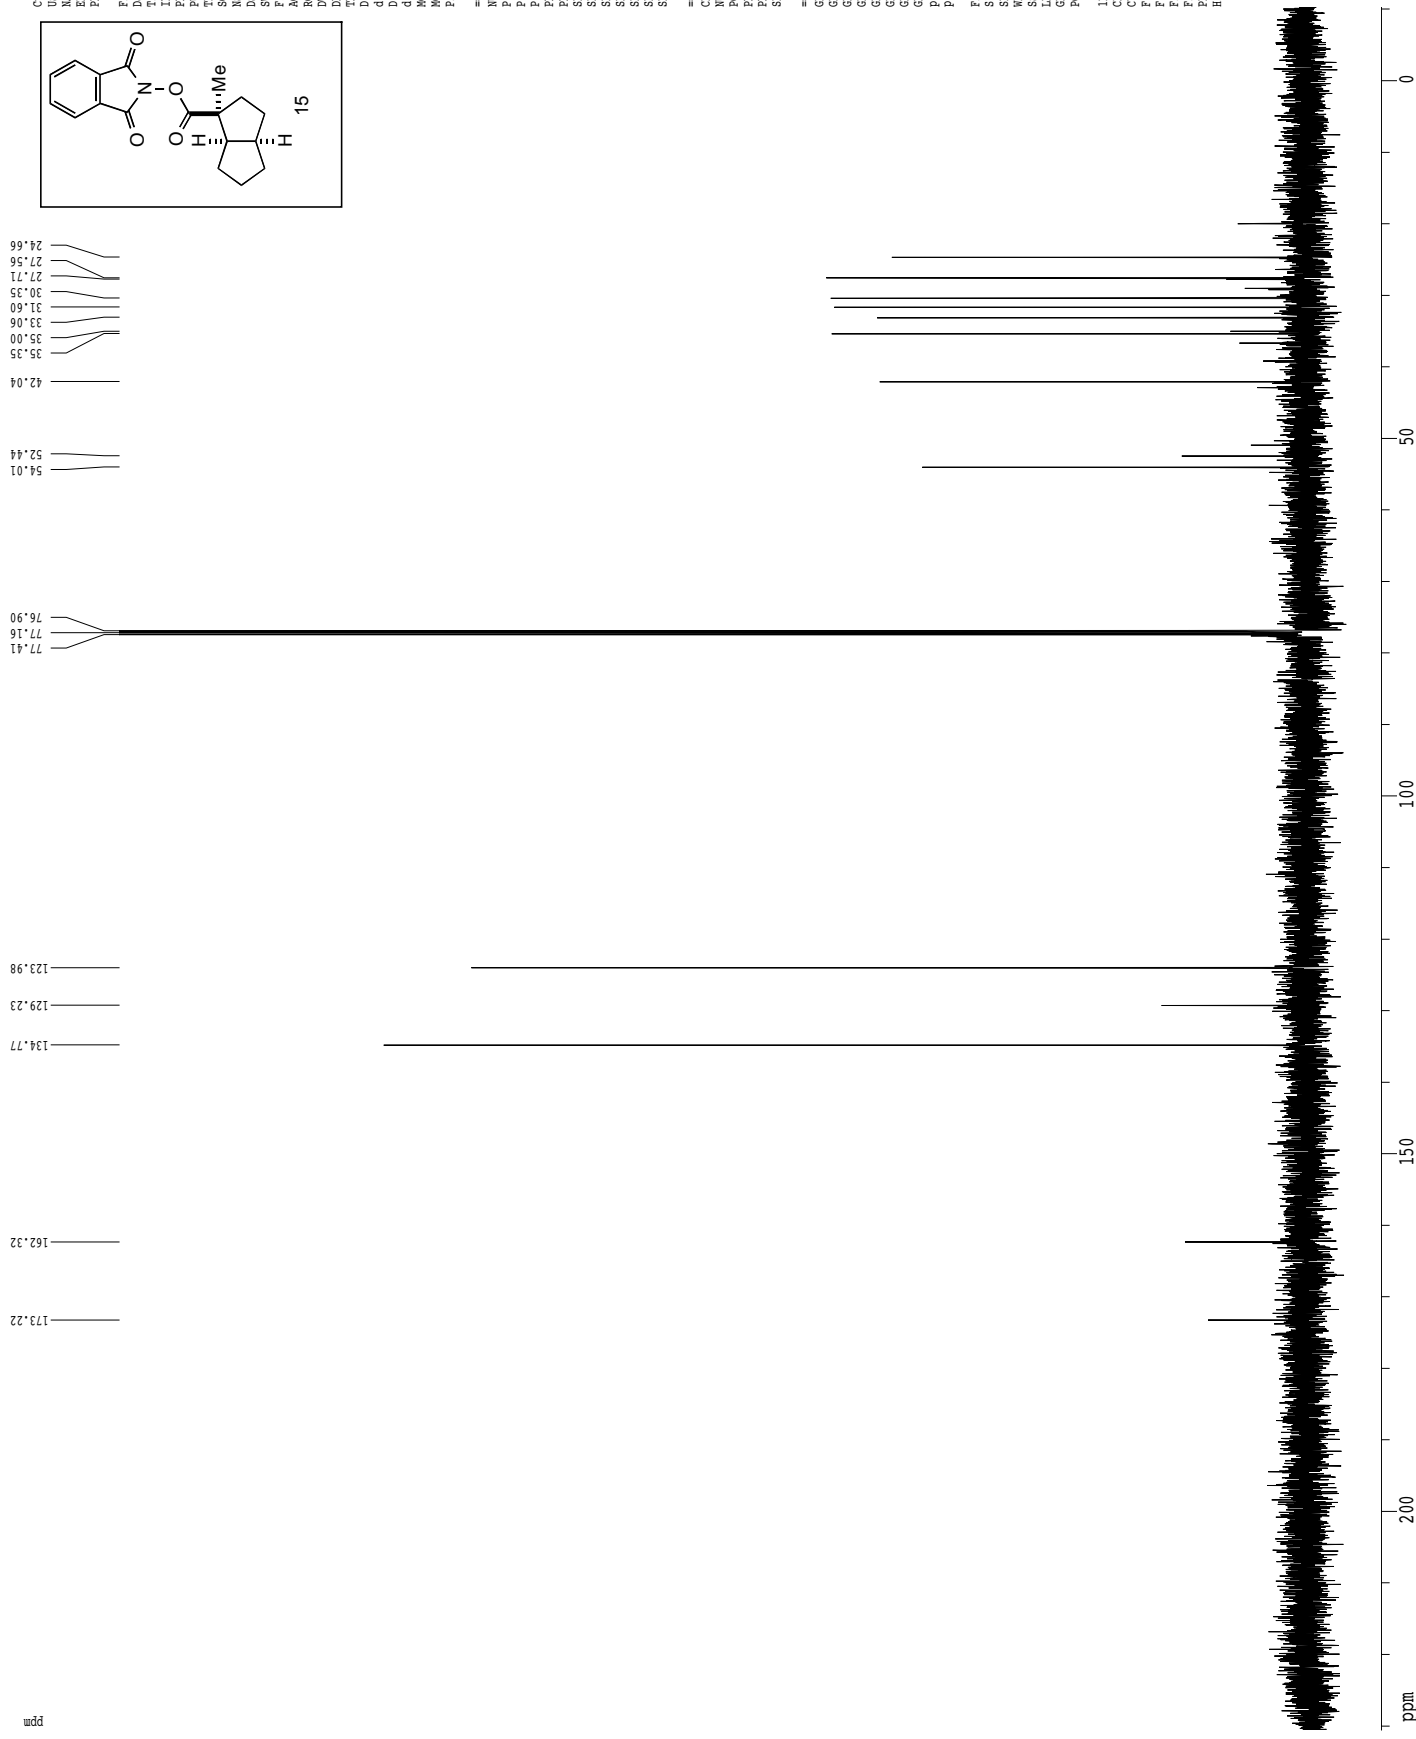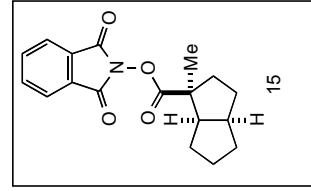

Current Data Parameters  
 USER SCHEUC  
 EXPNO 154-155-SC12  
 PROCNO 1  
 F2 - Acquisition Parameters  
 Date\_ 20111219  
 Time 9:38  
 INSTRUM cryo500  
 PROBRD 5 mm CPAC1 1H  
 PULPROG zgpg30  
 TD 65536  
 SOLVENT CDCl3  
 NS 318  
 DS 16  
 SWH 30303.031 Hz  
 FIDRES 0.462388 Hz  
 AQ 1.0815940 sec  
 RG 728.7  
 DR 6.00 usec  
 DE 298.0 K  
 TE 298.0 K  
 D1 0.25000000 sec  
 d11 0.03000000 sec  
 D16 0.00020000 sec  
 d17 0.00015600 sec  
 ACRESF 0.00000000 sec  
 ACWRK 0.01500000 sec  
 F2 3.00 usec

===== CHANNEL F1 =====  
 NUC1 13C  
 P1 15.50 usec  
 PL1 500.00 usec  
 PL2 2000.00 usec  
 PL0 120.00 dB  
 PL1 125.794568 dB  
 PL2 125.794568 dB  
 SP1 3.20 dB  
 SP2 3.20 dB  
 SFO1 Ccp60.0.5.20.1  
 SFO2 Ccp60.0.5.20.1  
 SFOFF1 0.00 Hz  
 SFOFF2 0.00 Hz

===== CHANNEL F2 =====  
 CDPGRZ wd t616  
 NUC2 1H  
 PCPD2 100.00 usec  
 PL2 1.60 dB  
 PL12 24.60 dB  
 SFO2 500.2225011 MHz

===== GRADIENT CHANNEL =====  
 GSPR1 0  
 GSPR2 0  
 GSPR3 0  
 GSPR4 0  
 GFL1 0.00 %  
 GFL2 0.00 %  
 GFL3 0.00 %  
 GFL4 0.00 %  
 GFL5 0.00 %  
 GFL6 0.00 %  
 GFL7 0.00 %  
 GFL8 0.00 %  
 GFL9 0.00 %  
 GFL10 0.00 %  
 GFL11 0.00 %  
 GFL12 0.00 %  
 GFL13 0.00 %  
 GFL14 0.00 %  
 GFL15 0.00 %  
 GFL16 0.00 %

F2 - Processing parameters  
 SI 65536  
 SF 125.7800880 MHz  
 WDW EM  
 SSB 0  
 LB 1.00 Hz  
 GB 0  
 PC 2.00

ID NMR plot parameters  
 CX 22.80 cm  
 CY 30.00 cm  
 FIP 230.637 ppm  
 F1 29005.68 Hz  
 F2 -10.287 ppm  
 FZ 129.596 Hz  
 HPCOM 11.568 ppm/cm  
 HECK 1329.1093 Hz/cm

1H spectrum

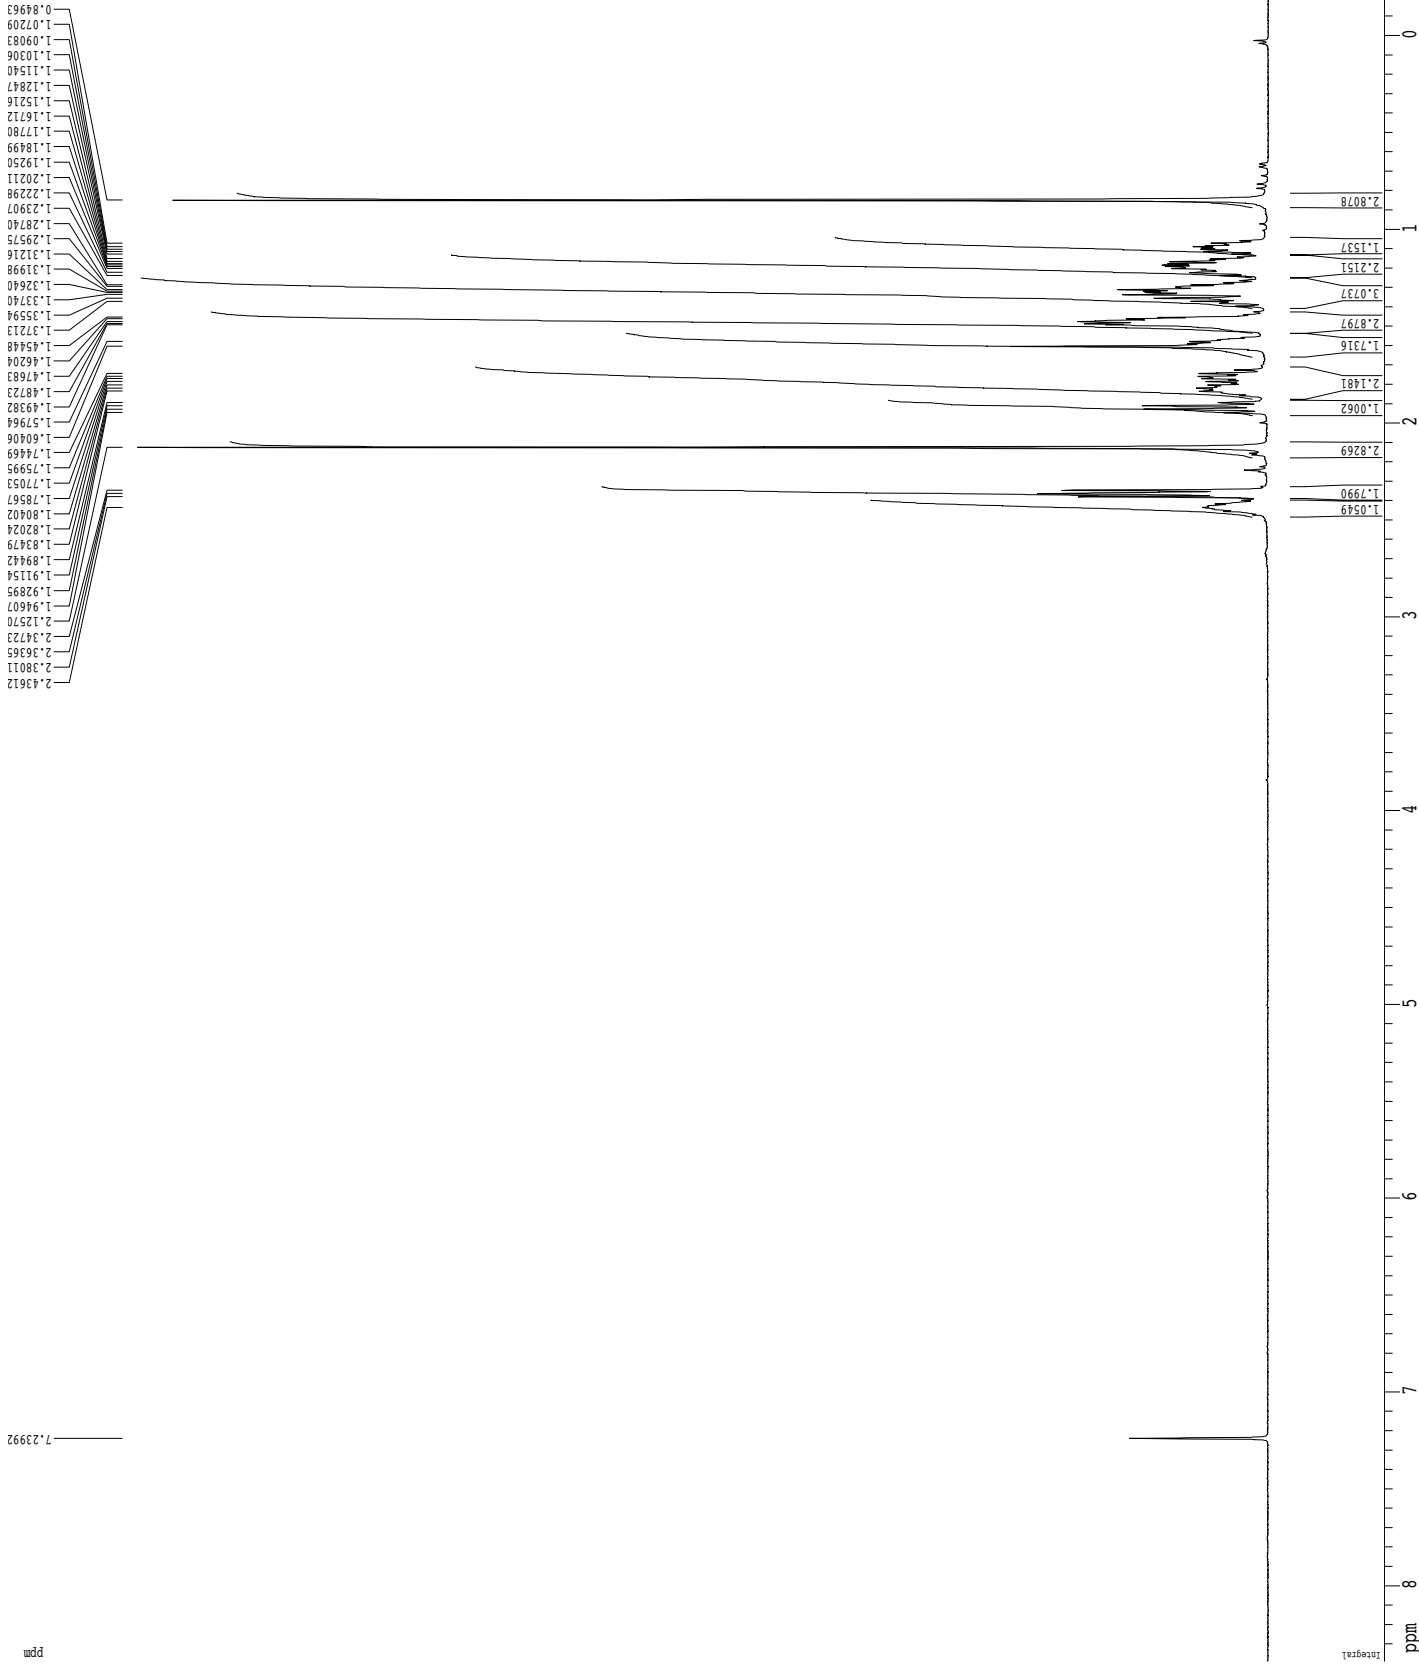

2.43612  
2.38011  
2.36365  
2.34723  
2.12570  
1.94607  
1.92895  
1.91154  
1.89442  
1.83479  
1.82024  
1.80402  
1.78567  
1.77053  
1.75995  
1.74695  
1.60406  
1.57964  
1.49382  
1.48723  
1.46783  
1.45448  
1.37213  
1.35594  
1.33740  
1.32640  
1.31998  
1.31216  
1.29575  
1.28740  
1.23907  
1.22296  
1.20211  
1.19250  
1.18499  
1.17780  
1.16712  
1.15216  
1.12847  
1.11540  
1.10306  
1.09083  
1.07209  
0.94963

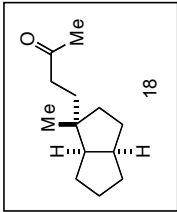

Current Data Parameters  
 USER schner  
 NAME mjs4-246-3c13  
 EXPNO 1  
 PROCNO 1

F2 - Acquisition Parameters  
 Date\_ 20120511  
 Time 16.39  
 INSTRUM cryo500  
 PROBRD 5 mm CPXI 1H-  
 PULPROG zg30  
 TD 81728  
 SOLVENT CDCl3  
 NS 7  
 DS 2  
 SWH 8012.820 Hz  
 FIDRES 0.098043 Hz  
 AQ 5.0958774 sec  
 RG 325  
 DW 62.40 usec  
 DE 6.00 usec  
 TE 288.0 K  
 D1 0.10000000 sec  
 MCREST 0.00000000 sec  
 MCWRR 0.01500000 sec

==== CHANNEL f1 =====  
 NUC1 1H  
 P1 7.50 usec  
 PL1 1.00 dB  
 SFO1 500.225015 MHz

F2 - Processing parameters  
 SI 32768  
 SF 500.220427 MHz  
 GSSS  
 MW 0  
 EM 0  
 SSB 0  
 LB 0.30 Hz  
 GB 0  
 PC 4.00

1D NMR plot parameters  
 CX 22.80 cm  
 CY 15.00 cm  
 FIP 8.389 ppm  
 F2 4196.36 Hz  
 F3 25.55 ppm  
 FZ -25.55 ppm  
 PPMCM 0.38008 ppm/cm  
 HZCM 198.12761 Hz/cm

Z-restored spin-echo <sup>13</sup>C spectrum with <sup>1</sup>H decoupling

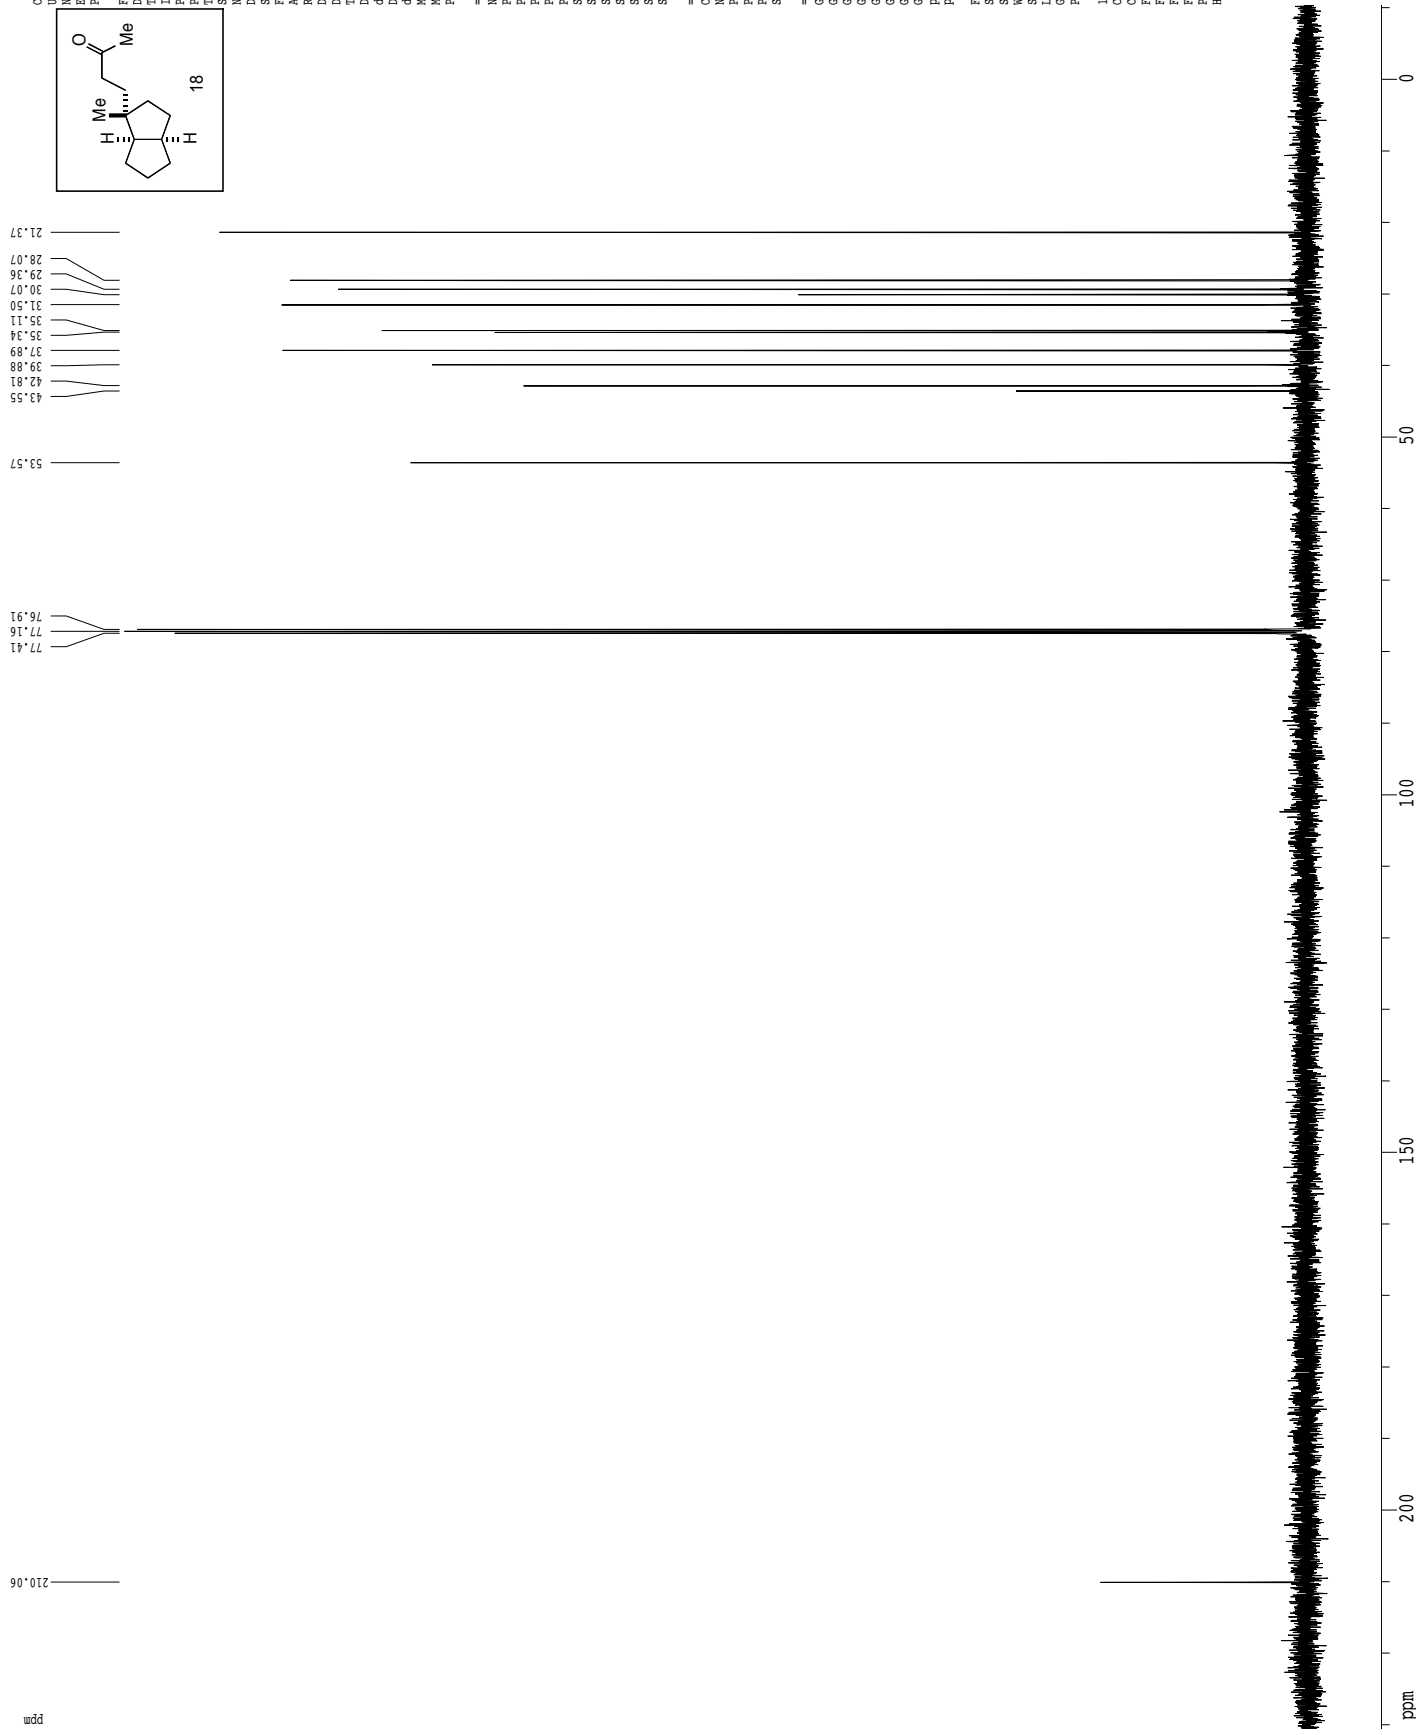

Current Data Parameters  
 USER mjs4-240-SC12  
 EXPNO 1  
 PROCNO 1  
 F2 - Acquisition Parameters  
 Date\_ 20120511  
 Time 16.45  
 INSTRUM cryo500  
 PROBRID 5 mm CPAC1 1H  
 PULPROG zgpg30  
 TD 65536  
 SFO 500.136261  
 SOLVENT CDCl3  
 NS 225  
 DS 16  
 SMR 30303.031 Hz  
 FIDRES 0.462388 Hz  
 AQ 1.0815940 sec  
 RG 2896.5  
 NG 16  
 DR 6.00 usec  
 DE 6.00 usec  
 TE 298.2 K  
 D1 0.25000000 sec  
 D11 0.03000000 sec  
 D16 0.00020000 sec  
 D17 0.00015600 sec  
 ACRESF 0.00000000 sec  
 ACWRK 0.01500000 sec  
 F2 31.00 usec

===== CHANNEL F1 =====  
 NUC1 <sup>13</sup>C  
 P1 15.50 usec  
 PL1 500.00 usec  
 PL2 2000.00 usec  
 PL0 120.00 dB  
 PL1 120.00 dB  
 PL2 120.00 dB  
 SF1 125.764568 MHz  
 SF2 500.136261 MHz  
 SP1 31.20 dB  
 SP2 31.20 dB  
 SFO1 Ccp60.0.5.20.1  
 SFO2 Ccp60comp.4  
 SFOFF1 0.00 Hz  
 SFOFF2 0.00 Hz

===== CHANNEL F2 =====  
 CDPRESZ wd1616  
 NUC2 <sup>1</sup>H  
 PCPD2 100.00 usec  
 PL2 1.60 dB  
 PL12 24.60 dB  
 SFO2 500.2225011 MHz

===== GRADIENT CHANNEL =====  
 GSPR1 0.00 %  
 GSPR2 0.00 %  
 GSPR3 0.00 %  
 GSPR4 0.00 %  
 GSPR5 0.00 %  
 GSPR6 0.00 %  
 GSPR7 0.00 %  
 GSPR8 0.00 %  
 GSPR9 0.00 %  
 GSPR10 0.00 %  
 GSPR11 0.00 %  
 GSPR12 0.00 %  
 GSPR13 0.00 %  
 GSPR14 0.00 %  
 GSPR15 0.00 %  
 GSPR16 0.00 %  
 GSPR17 0.00 %  
 GSPR18 0.00 %  
 GSPR19 0.00 %  
 GSPR20 0.00 %  
 GSPR21 0.00 %  
 GSPR22 0.00 %  
 GSPR23 0.00 %  
 GSPR24 0.00 %  
 GSPR25 0.00 %  
 GSPR26 0.00 %  
 GSPR27 0.00 %  
 GSPR28 0.00 %  
 GSPR29 0.00 %  
 GSPR30 0.00 %  
 GSPR31 0.00 %  
 GSPR32 0.00 %  
 GSPR33 0.00 %  
 GSPR34 0.00 %  
 GSPR35 0.00 %  
 GSPR36 0.00 %  
 GSPR37 0.00 %  
 GSPR38 0.00 %  
 GSPR39 0.00 %  
 GSPR40 0.00 %  
 GSPR41 0.00 %  
 GSPR42 0.00 %  
 GSPR43 0.00 %  
 GSPR44 0.00 %  
 GSPR45 0.00 %  
 GSPR46 0.00 %  
 GSPR47 0.00 %  
 GSPR48 0.00 %  
 GSPR49 0.00 %  
 GSPR50 0.00 %  
 GSPR51 0.00 %  
 GSPR52 0.00 %  
 GSPR53 0.00 %  
 GSPR54 0.00 %  
 GSPR55 0.00 %  
 GSPR56 0.00 %  
 GSPR57 0.00 %  
 GSPR58 0.00 %  
 GSPR59 0.00 %  
 GSPR60 0.00 %  
 GSPR61 0.00 %  
 GSPR62 0.00 %  
 GSPR63 0.00 %  
 GSPR64 0.00 %  
 GSPR65 0.00 %  
 GSPR66 0.00 %  
 GSPR67 0.00 %  
 GSPR68 0.00 %  
 GSPR69 0.00 %  
 GSPR70 0.00 %  
 GSPR71 0.00 %  
 GSPR72 0.00 %  
 GSPR73 0.00 %  
 GSPR74 0.00 %  
 GSPR75 0.00 %  
 GSPR76 0.00 %  
 GSPR77 0.00 %  
 GSPR78 0.00 %  
 GSPR79 0.00 %  
 GSPR80 0.00 %  
 GSPR81 0.00 %  
 GSPR82 0.00 %  
 GSPR83 0.00 %  
 GSPR84 0.00 %  
 GSPR85 0.00 %  
 GSPR86 0.00 %  
 GSPR87 0.00 %  
 GSPR88 0.00 %  
 GSPR89 0.00 %  
 GSPR90 0.00 %  
 GSPR91 0.00 %  
 GSPR92 0.00 %  
 GSPR93 0.00 %  
 GSPR94 0.00 %  
 GSPR95 0.00 %  
 GSPR96 0.00 %  
 GSPR97 0.00 %  
 GSPR98 0.00 %  
 GSPR99 0.00 %  
 GSPR100 0.00 %

F2 - Processing parameters  
 SI 65536  
 SF 125.7800090 MHz  
 WDW EM  
 SSB 0  
 LB 1.00 Hz  
 GB 0  
 PC 2.00  
 ID NMR plot parameters  
 CX 22.80 cm  
 CY 15.65 cm  
 FIP 230.540 ppm  
 F1 28997.42 Hz  
 F2 -10.380 ppm  
 F2 -1307.61 Hz  
 F2 -10.680 ppm/cm  
 HECK 1329.0032 Hz/cm



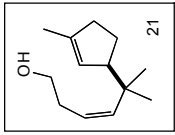

Current Data Parameters  
 USER schner  
 NAME ms003-24-3-1c13  
 EXPNO 1  
 PROCNO 1

F2 - Acquisition Parameters  
 Date\_ 20100831  
 Time 11.42  
 MSNAME cryo300  
 PROBHD 5 mm CPCLP1 420  
 PULPROG zgpg30  
 TD 81728  
 SOLVENT CDCl3  
 NS 7  
 DS 2  
 SWH 8012.820 Hz  
 FIDRES 0.098043 Hz  
 AQ 5.0998774 sec  
 RG 5.7  
 DW 62.400 usec  
 DE 6.00 usec  
 TE 298.0 K  
 MCREST 0.1000000 sec  
 MCHNK 0.01500000 sec

==== CHANNEL f1 =====  
 NUCL 1H  
 P1 7.50 usec  
 PL1 1.60 dB  
 SFO1 500.2235015 MHz

F2 - Processing parameters  
 SI 65536  
 SF 500.2199863 MHz  
 WDW EM  
 SS 0  
 LB 0.30 Hz  
 GB 0  
 PC 4.00

1D NMR plot parameters  
 CX 22.80 cm  
 CY 15.00 cm  
 F1P 7.533 ppm  
 F1 3767.56 Hz  
 F2P 0.197 ppm  
 F2 98.54 Hz  
 PRCH 0.32174 ppm/cm  
 HZCX 160.93959 Hz/cm

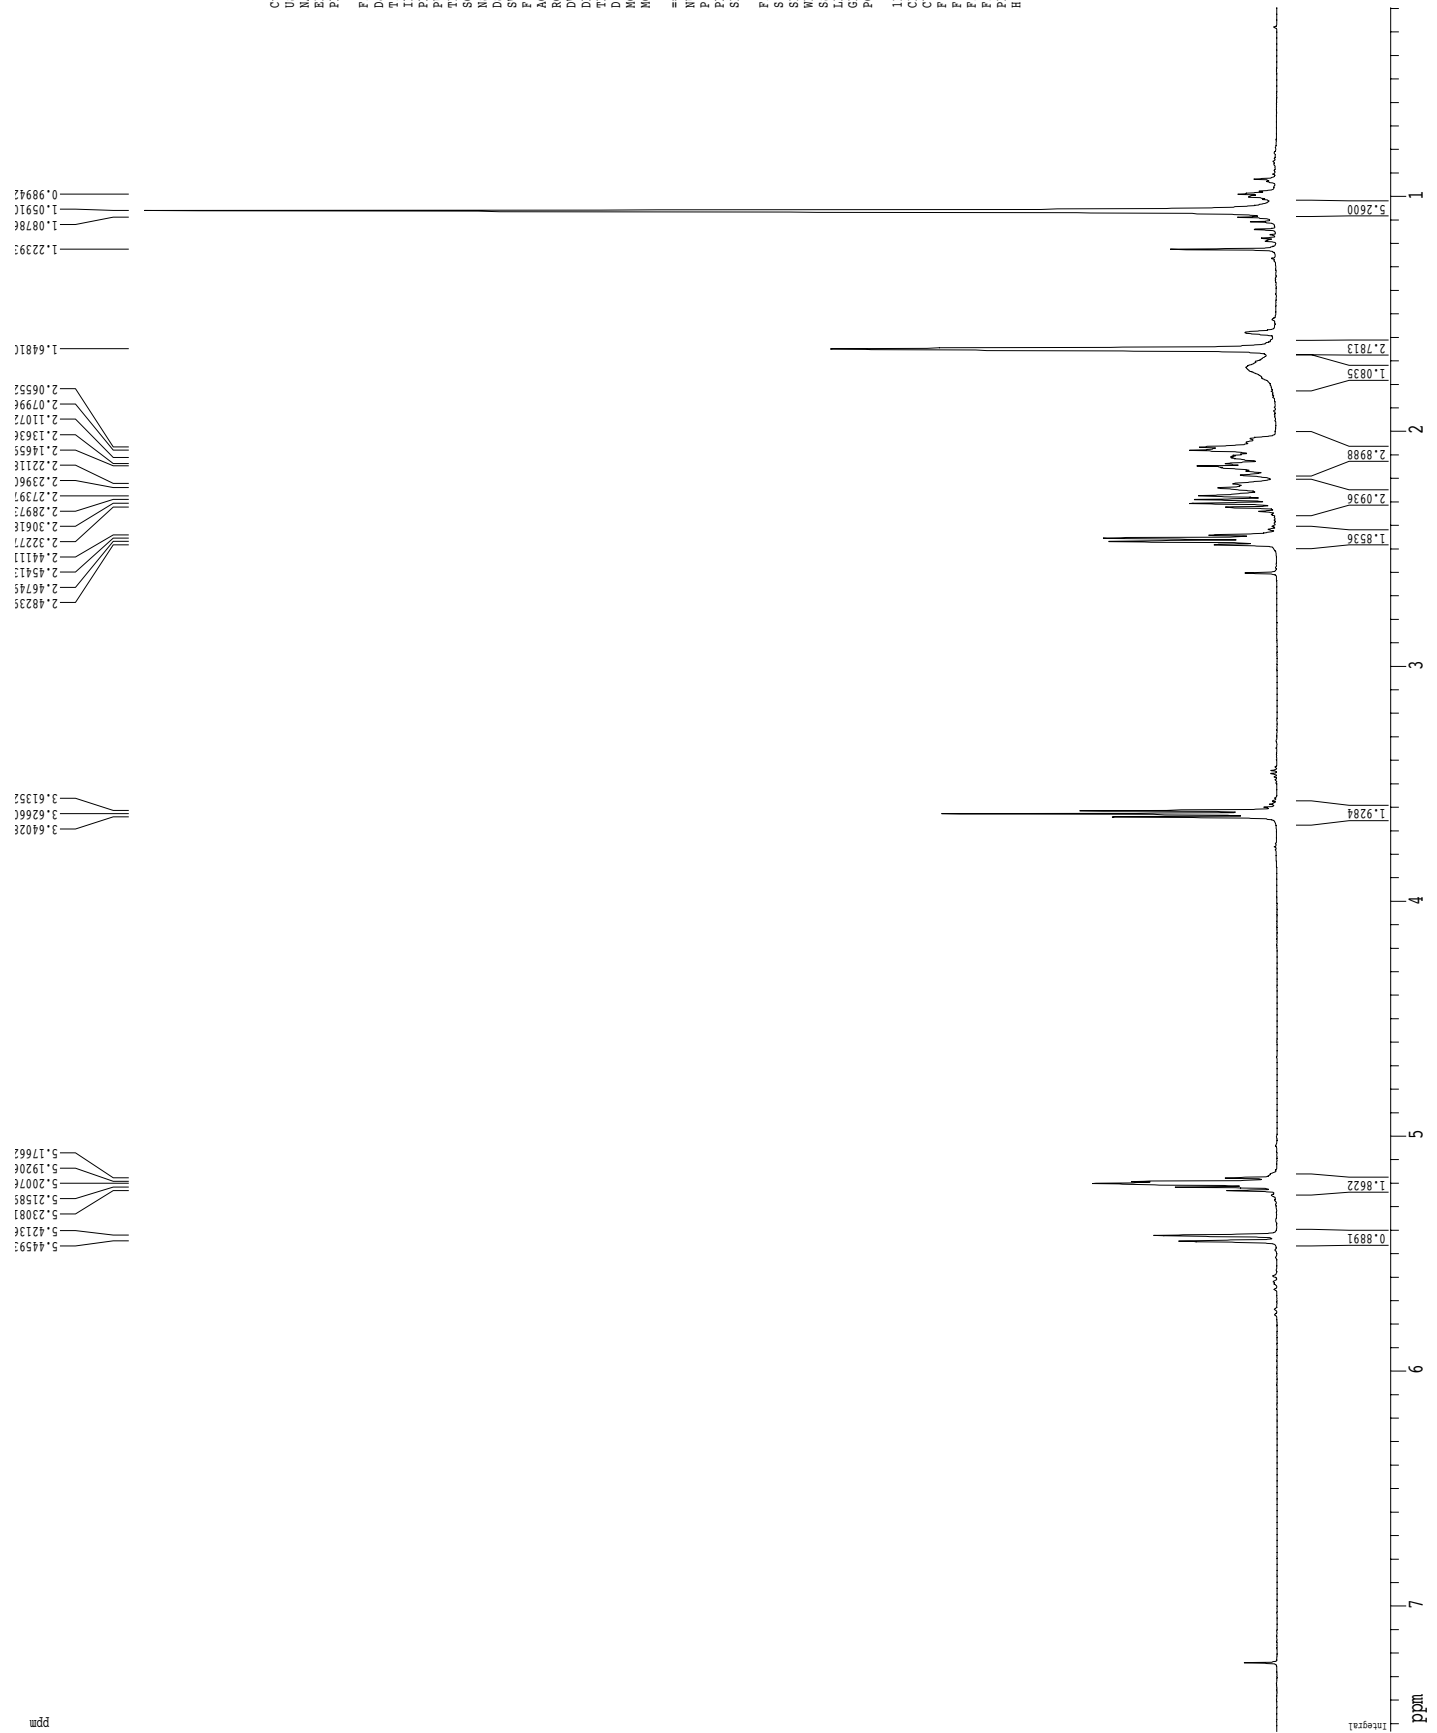

Z-restored spin-echo <sup>13</sup>C spectrum with <sup>1</sup>H decoupling

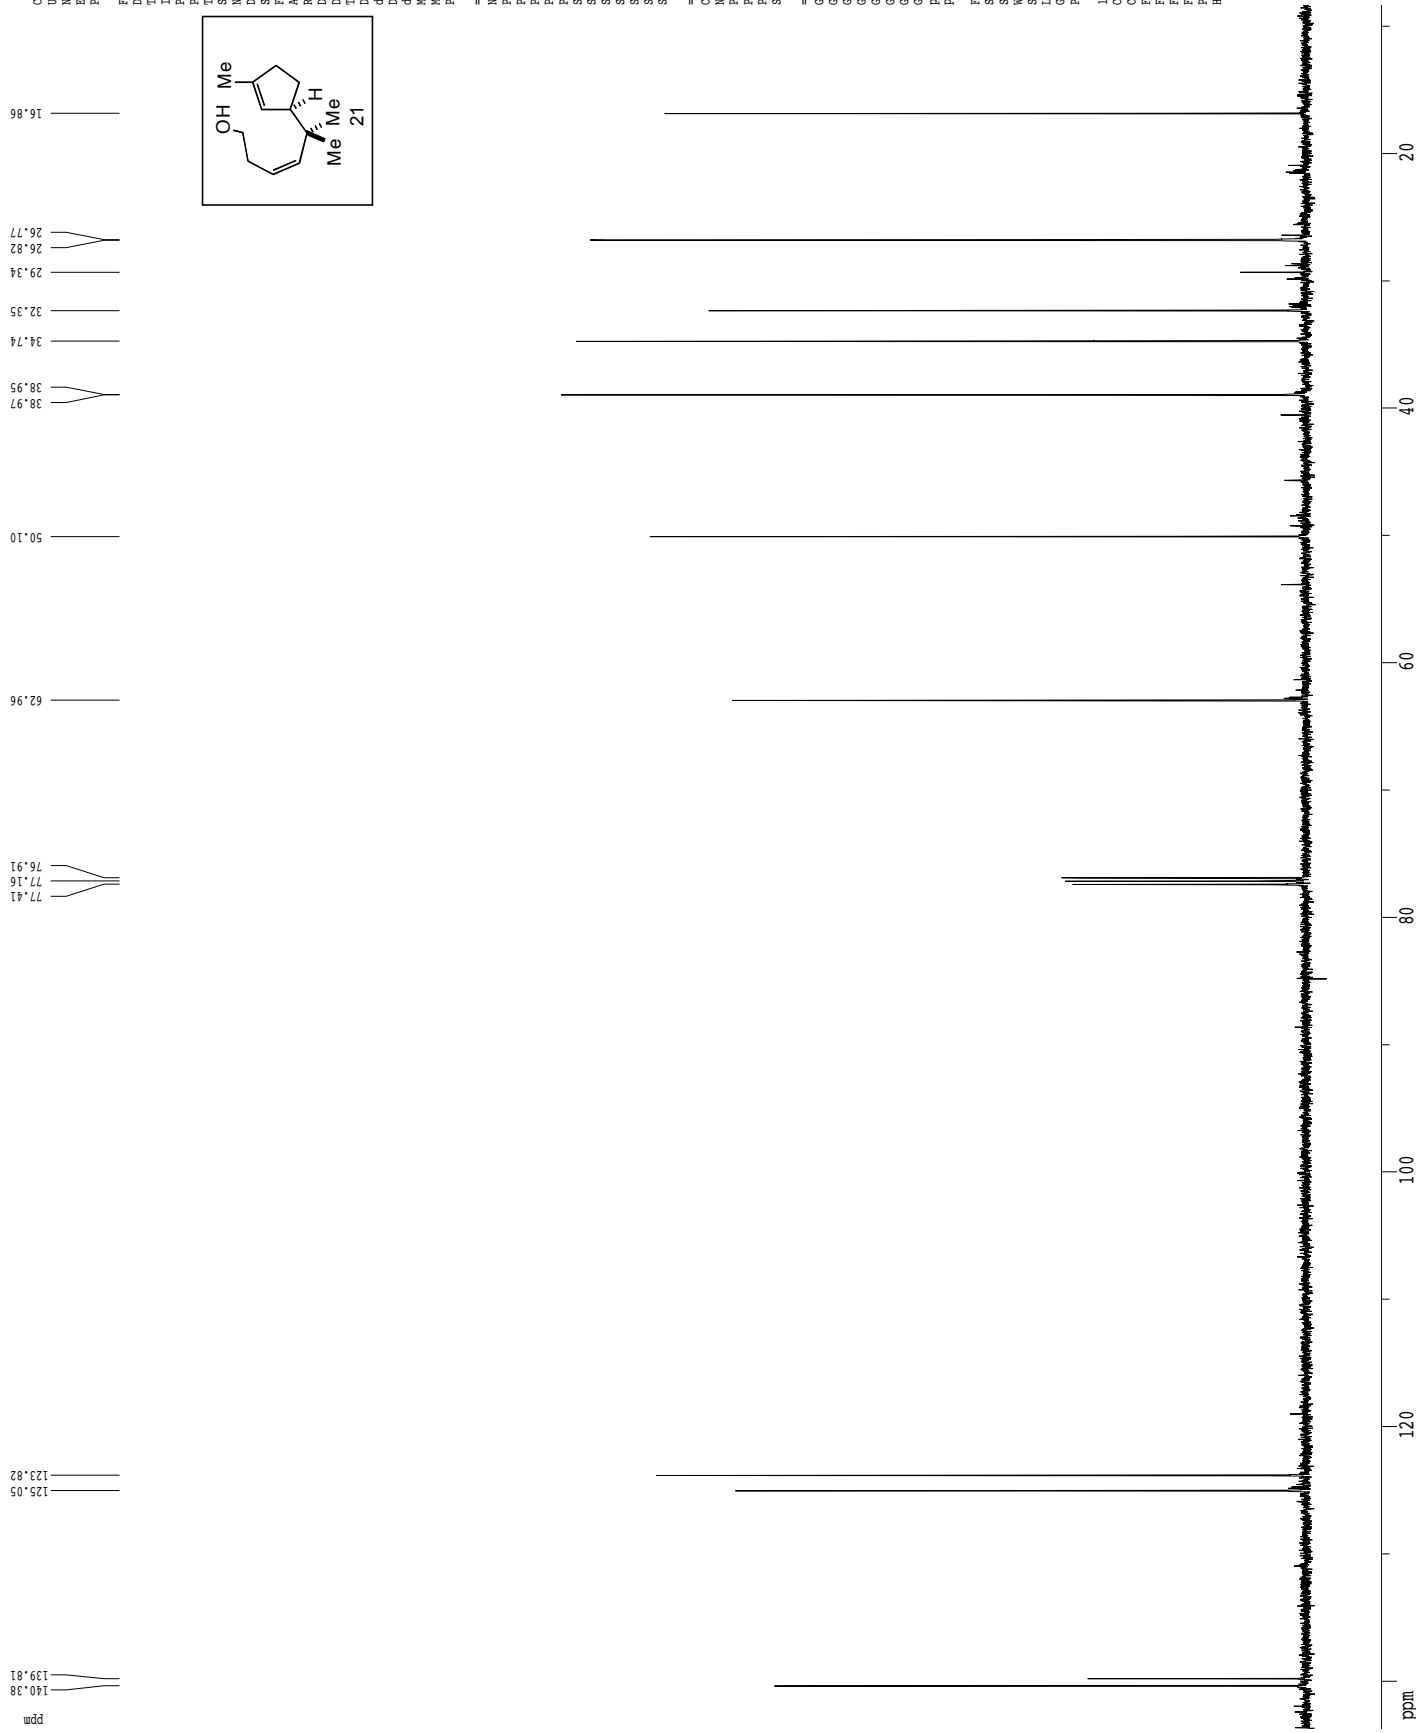

Current Data Parameters  
 USER Scmcs  
 MS003-245-4133  
 EXPNO 1  
 PROCNO 1

F2 - Acquisition Parameters  
 Date\_ 20100831  
 Time 11.44  
 INSTRUM cryo500  
 PROBRID 5 mm CPAC1 JH  
 PULPROG zgpg30  
 TD 65536  
 SOLVENT CDCl3  
 NS 45  
 DS 16  
 SMR 30303.031 Hz  
 FIDRES 0.462388 Hz  
 AQ 1.0815940 sec  
 RG 3280.75  
 DW 19.60 usec  
 DE 6.00 usec  
 TE 298.2 K  
 D1 0.25000000 sec  
 d11 0.03000000 sec  
 D16 0.00020000 sec  
 d17 0.00015600 sec  
 ACQRESF 0.00000000 sec  
 ACQBRK 0.01500000 sec  
 F2 3.00 usec

===== CHANNEL F1 =====  
 NUC1 <sup>13</sup>C  
 P1 15.50 usec  
 P11 500.00 usec  
 P12 2000.00 usec  
 PL0 120.00 dB  
 PL1 125.7947548 dB  
 SP1 3.20 dB  
 SP2 3.20 dB  
 SFO1 125.7614618 MHz  
 SFO2 500.2225011 MHz  
 SFNAM1 Ccp60.0.5.20.1  
 SFNAM2 Ccp60comp.4  
 SFOFF1 0.00 Hz  
 SFOFF2 0.00 Hz

===== CHANNEL F2 =====  
 CPDPRG2 waltz16  
 NUC2 <sup>1</sup>H  
 PCPD2 100.00 usec  
 PL2 1.60 dB  
 PL12 24.60 dB  
 SFO2 500.2225011 MHz

===== GRADIENT CHANNEL =====  
 GSPRMR1 SFR 1.00  
 GSPRMR2 SFR 1.00  
 GSPRMR3 SFR 1.00  
 GFL1 0.00 %  
 GFL2 0.00 %  
 GFL3 0.00 %  
 GFL4 0.00 %  
 GFL5 30.00 %  
 GFL6 50.00 %  
 GFL7 50.00 usec  
 GFL8 100.00 usec

F2 - Processing parameters  
 SI 65536  
 SF 125.7803974 MHz  
 WDW EM  
 SSB 0  
 LB 1.00 Hz  
 GB 0  
 PC 2.00

ID NMR plot parameters  
 CX 22.80 cm  
 CY 10.00 cm  
 FIP 143.731 ppm  
 F1 18078.48 Hz  
 F2 8.354 ppm  
 F3 1950.73 Hz  
 F4 5.1338 ppm/cm  
 HECK 746.83142 Hz/cm

ppm

0.90372  
 1.02281  
 1.03888  
 1.05694  
 1.08800  
 1.49593  
 1.53226  
 1.55056  
 1.56466  
 1.57915  
 1.59235  
 1.60605  
 1.64436  
 1.70562  
 1.85534  
 1.87194  
 1.88665  
 1.89955  
 1.91135  
 1.92692  
 2.15158  
 2.16445  
 2.17787  
 2.62231  
 2.62644  
 2.63055  
 2.64290  
 2.73500  
 2.74966  
 2.76412  
 2.77851  
 3.11992  
 3.10538  
 3.13451

5.08527  
 5.09973  
 5.10976  
 5.11343  
 5.12405  
 5.13854  
 5.23994  
 5.37482  
 5.39911

7.24036  
 7.34205

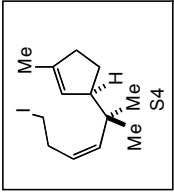

Current Data Parameters  
 USER schber  
 NAME mjsf-183-3  
 EXPNO 1  
 PROCNO 1  
 F2 - Acquisition Parameters  
 Date\_ 20120221  
 Time 11.27  
 INSTRUM gn500  
 PROBDW 5 mm broadband  
 PULPROG zg30  
 TD 81728  
 SFO1 499.5134966 MHz  
 SOLID 10  
 NS 2  
 DS 2  
 SFR 8012.820 Hz  
 FIDRES 0.098043 Hz  
 AQ 5.0998774 sec  
 RG 1024  
 DW 62.400 usec  
 DE 6.00 usec  
 TE 298.0 K  
 D1 0.10000000 sec  
 MCREST 0.00000000 sec  
 MCWRR 0.01500000 sec  
 ===== CHANNEL f1 =====  
 NUC1 1H  
 P1 12.20 usec  
 PL1 -5.00 dB  
 SFO1 499.5134966 MHz  
 F2 - Processing parameters  
 SI 65536  
 SF 499.5100372 MHz  
 WDW EM  
 SSB 0  
 LB 0.30 Hz  
 GB 0  
 PC 1.00  
 ID NMR plot parameters  
 CX 22.80 cm  
 CY 15.00 cm  
 FIP 8.099 ppm  
 F1 4045.35 Hz  
 F2P -0.329 ppm  
 F2 -164.37 Hz  
 PPMCN 0.36964 ppm/cm  
 HZCN 184.63689 Hz/cm

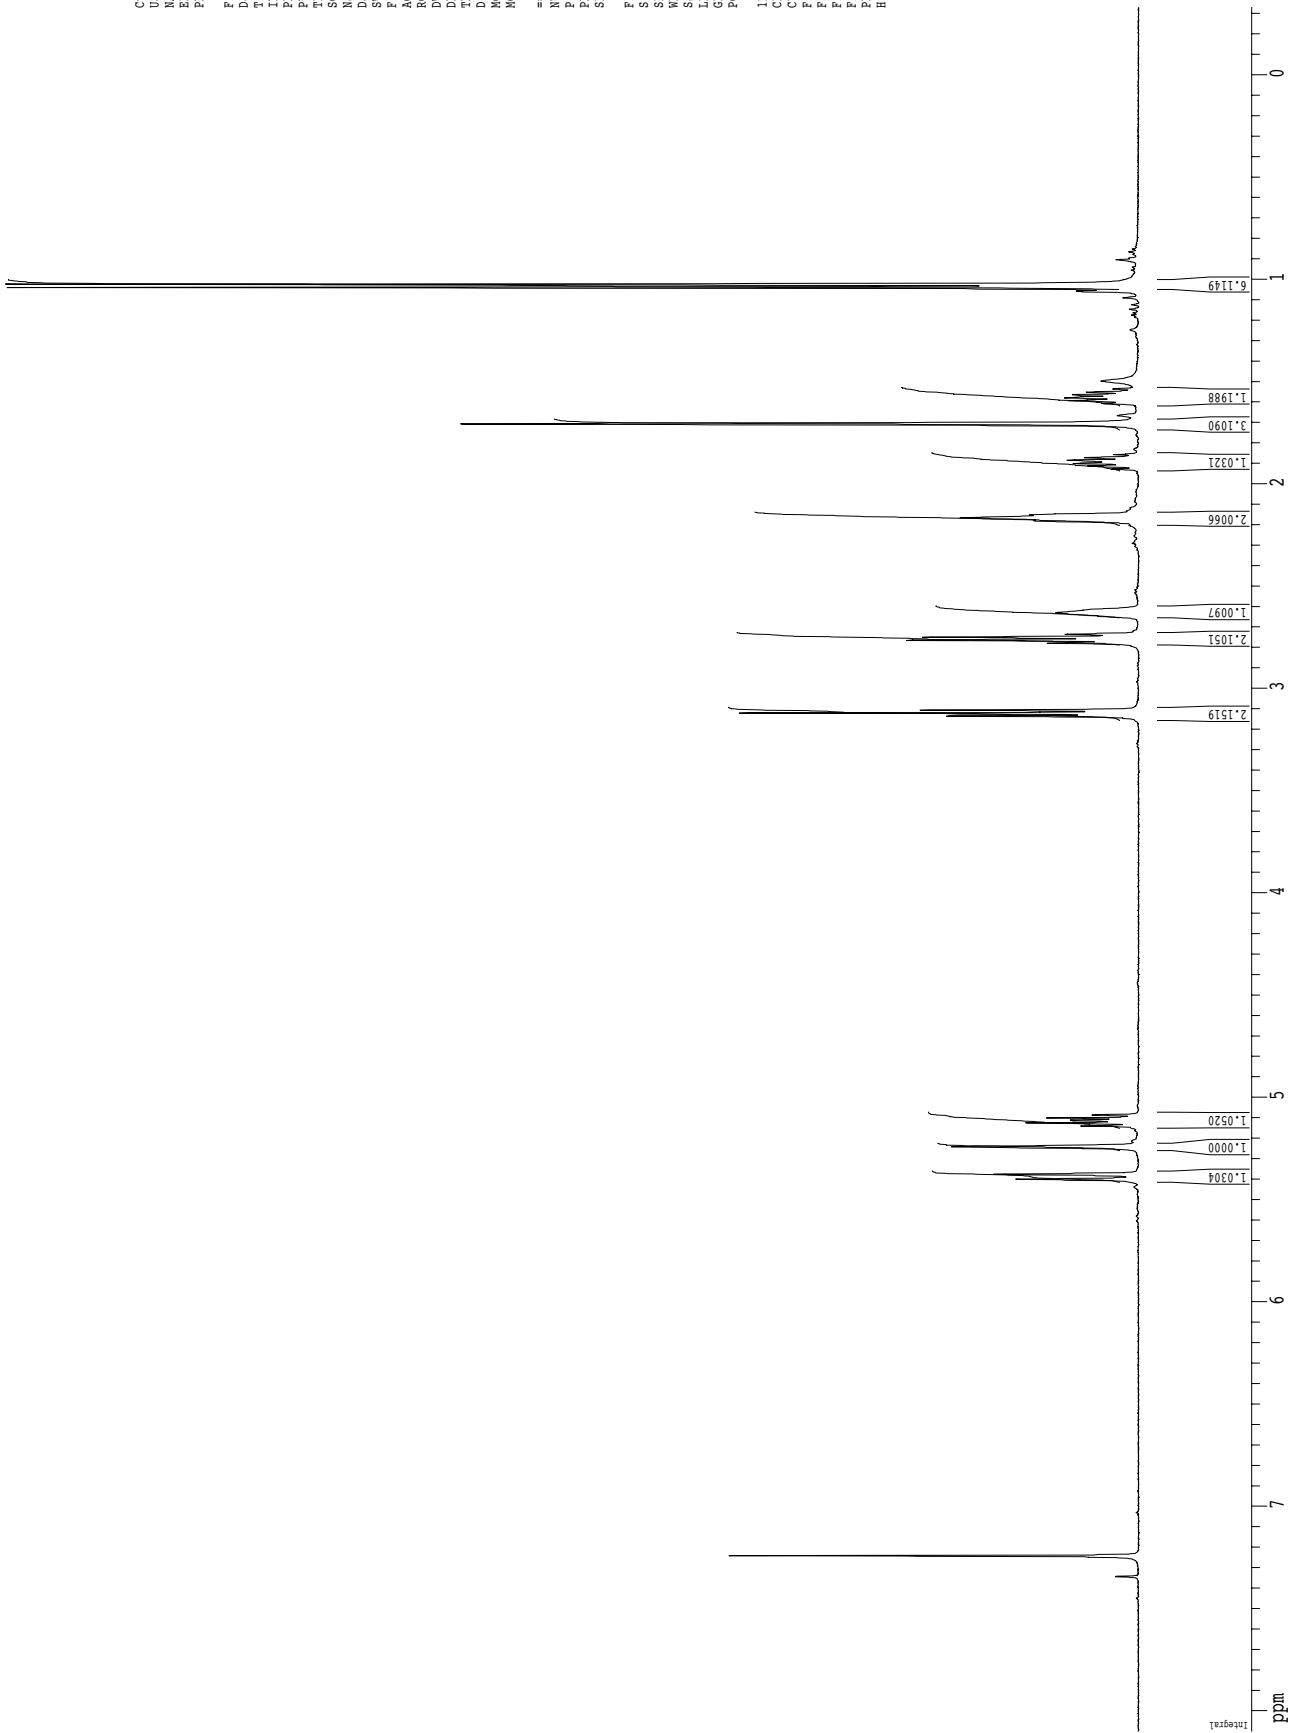

Integral

ppm

Z-restored spin-echo <sup>13</sup>C spectrum with <sup>1</sup>H decoupling

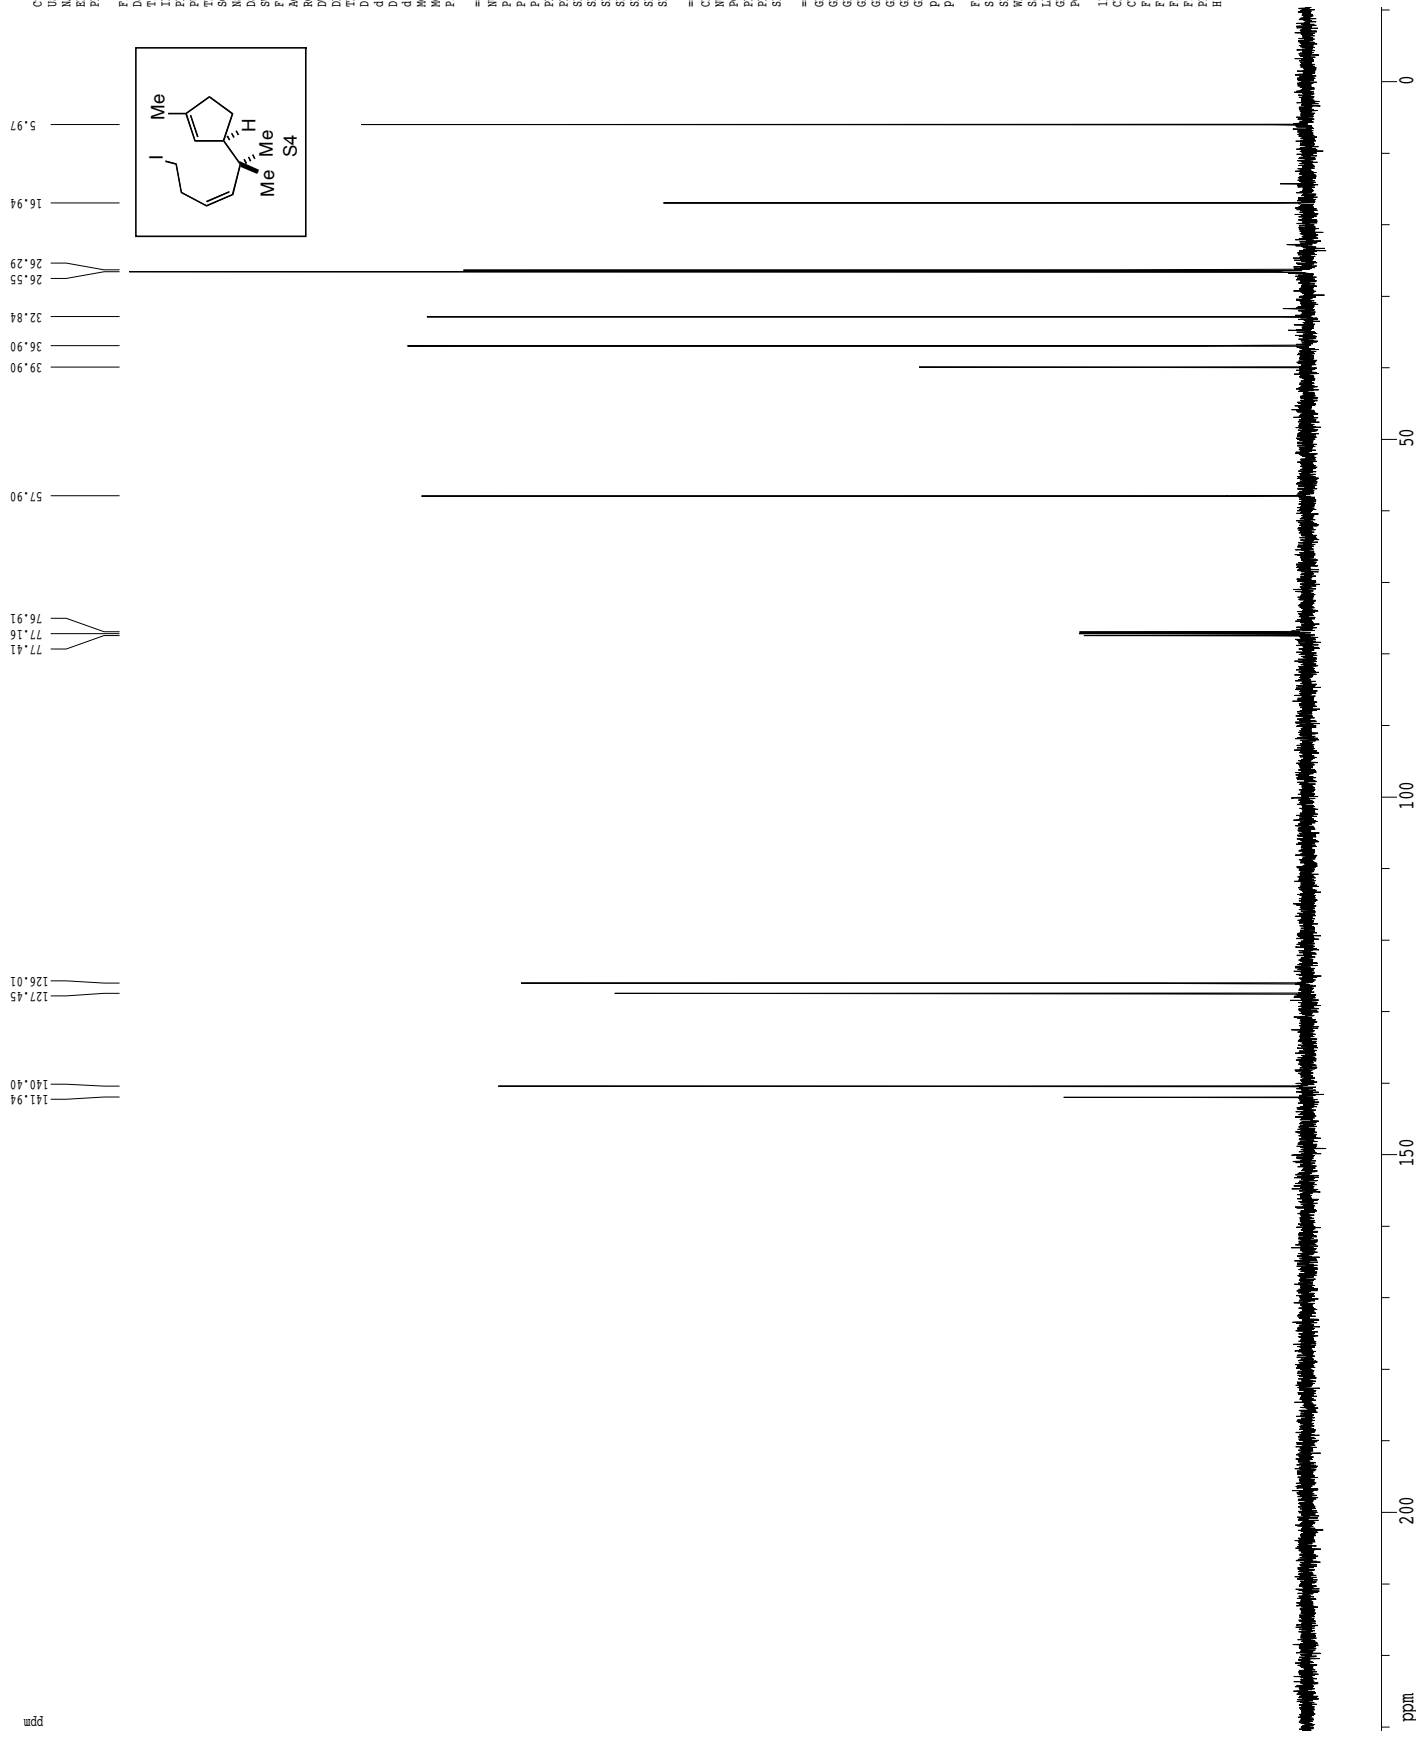

Current Data Parameters  
 USER SCHUC  
 EXPNO 1  
 PROCNO 1  
 F2 - Acquisition Parameters  
 Date\_ 20100413  
 Time 13.02  
 INSTRUM cryo500  
 PROBRD 5 mm CPAC1 JH  
 PULPROG zgpg30  
 TD 65536  
 SOLVENT CDCl3  
 NS 11  
 DS 16  
 SWH 30303.031 Hz  
 FIDRES 0.462388 Hz  
 AQ 1.0815940 sec  
 RG 2298.8  
 NG 6.00 usec  
 DR 6.00 usec  
 DE 298.2 K  
 TE 298.2 K  
 D1 0.25000000 sec  
 d11 0.03000000 sec  
 D16 0.00020000 sec  
 d17 0.00015600 sec  
 ACRESF 0.00000000 sec  
 ACWRK 0.01500000 sec  
 F2 3.00 usec

===== CHANNEL F1 =====  
 NUC1 <sup>13</sup>C  
 P1 15.50 usec  
 P11 500.00 usec  
 P12 2000.00 usec  
 P10 120.00 dB  
 P11 125.794568 dB  
 SFO1 125.761488 MHz  
 SFO2 500.2225011 MHz  
 SP1 5.20 dB  
 SP2 3.20 dB  
 SPNAM1 Cyp60.0.5.20.1  
 SPNAM2 Cyp60comp.4  
 SFOFF1 0.00 Hz  
 SFOFF2 0.00 Hz

===== CHANNEL F2 =====  
 CPDPRG2 waltz16  
 NUC2 <sup>1</sup>H  
 P1 100.00 usec  
 P12 1.60 dB  
 P11 24.60 dB  
 SFO1 500.2225011 MHz  
 SFO2 500.2225011 MHz

===== GRADIENT CHANNEL =====  
 GBRM1 0.00 %  
 GBRM2 0.00 %  
 GBRM3 0.00 %  
 GBRM4 0.00 %  
 GBRM5 0.00 %  
 GBRM6 0.00 %  
 GBRM7 0.00 %  
 GBRM8 0.00 %  
 GBRM9 0.00 %  
 GBRM10 0.00 %  
 GBRM11 0.00 %  
 GBRM12 0.00 %  
 GBRM13 0.00 %  
 GBRM14 0.00 %  
 GBRM15 0.00 %  
 GBRM16 0.00 %  
 GBRM17 0.00 %  
 GBRM18 0.00 %  
 GBRM19 0.00 %  
 GBRM20 0.00 %  
 GBRM21 0.00 %  
 GBRM22 0.00 %  
 GBRM23 0.00 %  
 GBRM24 0.00 %  
 GBRM25 0.00 %  
 GBRM26 0.00 %  
 GBRM27 0.00 %  
 GBRM28 0.00 %  
 GBRM29 0.00 %  
 GBRM30 0.00 %  
 GBRM31 0.00 %  
 GBRM32 0.00 %  
 GBRM33 0.00 %  
 GBRM34 0.00 %  
 GBRM35 0.00 %  
 GBRM36 0.00 %  
 GBRM37 0.00 %  
 GBRM38 0.00 %  
 GBRM39 0.00 %  
 GBRM40 0.00 %  
 GBRM41 0.00 %  
 GBRM42 0.00 %  
 GBRM43 0.00 %  
 GBRM44 0.00 %  
 GBRM45 0.00 %  
 GBRM46 0.00 %  
 GBRM47 0.00 %  
 GBRM48 0.00 %  
 GBRM49 0.00 %  
 GBRM50 0.00 %  
 GBRM51 0.00 %  
 GBRM52 0.00 %  
 GBRM53 0.00 %  
 GBRM54 0.00 %  
 GBRM55 0.00 %  
 GBRM56 0.00 %  
 GBRM57 0.00 %  
 GBRM58 0.00 %  
 GBRM59 0.00 %  
 GBRM60 0.00 %  
 GBRM61 0.00 %  
 GBRM62 0.00 %  
 GBRM63 0.00 %  
 GBRM64 0.00 %  
 GBRM65 0.00 %  
 GBRM66 0.00 %  
 GBRM67 0.00 %  
 GBRM68 0.00 %  
 GBRM69 0.00 %  
 GBRM70 0.00 %  
 GBRM71 0.00 %  
 GBRM72 0.00 %  
 GBRM73 0.00 %  
 GBRM74 0.00 %  
 GBRM75 0.00 %  
 GBRM76 0.00 %  
 GBRM77 0.00 %  
 GBRM78 0.00 %  
 GBRM79 0.00 %  
 GBRM80 0.00 %  
 GBRM81 0.00 %  
 GBRM82 0.00 %  
 GBRM83 0.00 %  
 GBRM84 0.00 %  
 GBRM85 0.00 %  
 GBRM86 0.00 %  
 GBRM87 0.00 %  
 GBRM88 0.00 %  
 GBRM89 0.00 %  
 GBRM90 0.00 %  
 GBRM91 0.00 %  
 GBRM92 0.00 %  
 GBRM93 0.00 %  
 GBRM94 0.00 %  
 GBRM95 0.00 %  
 GBRM96 0.00 %  
 GBRM97 0.00 %  
 GBRM98 0.00 %  
 GBRM99 0.00 %  
 GBRM100 0.00 %

F2 - Processing parameters  
 SI 65536  
 SF 125.7804136 MHz  
 WDW EM  
 SSB 0  
 LB 1.00 Hz  
 GB 0  
 PC 2.00  
 ID NMR plot parameters  
 CX 22.80 cm  
 CY 15.65 cm  
 FIP 230.509 ppm  
 F1 28992.79 Hz  
 F2 -10.417 ppm  
 F2 1310.24 Hz  
 F3 10.663 ppm/cm  
 HECK 1329.0032 Hz/cm

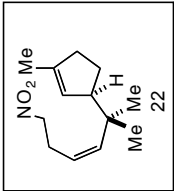

Current Data Parameters  
 USER schner  
 NAME ms02-258--3c13  
 EXPNO 1  
 PROCNO 1

F2 - Acquisition Parameters  
 Date\_ 20100403  
 Time 9:33  
 INSTRUM cryo500  
 PULPROG zgpg30  
 FIDRES 5 mm CPIC1 1.0  
 P1 81728  
 TD 81728  
 SOLVENT CDCl3  
 NS 7  
 DS 2

SWH 8012.820 Hz  
 FIDRES 0.098043 Hz  
 AQ 5.0998774 sec  
 RG 3.6  
 DW 62.400 usec  
 DE 6.00 usec  
 TE 298.0 K  
 MCFRESF 0.1000000 sec  
 MCHNK 0.01500000 sec  
 ===== CHANNEL f1 =====  
 NU1 1H  
 P1 7.50 usec  
 PL1 1.60 dB  
 SFO1 500.2235015 MHz

F2 - Processing parameters  
 SI 65536  
 SF 500.2200416 MHz  
 EQ  
 F2 0.30 Hz  
 GB 0  
 PC 4.00

1D NMR plot parameters  
 CX 22.80 cm  
 CY 15.00 cm  
 F1P 7.499 ppm  
 F1 3750.37 Hz  
 F2P -0.407 ppm  
 F2 -200.62 Hz  
 PRCH 0.34674 ppm/cm  
 HZCX 173.44678 Hz/cm

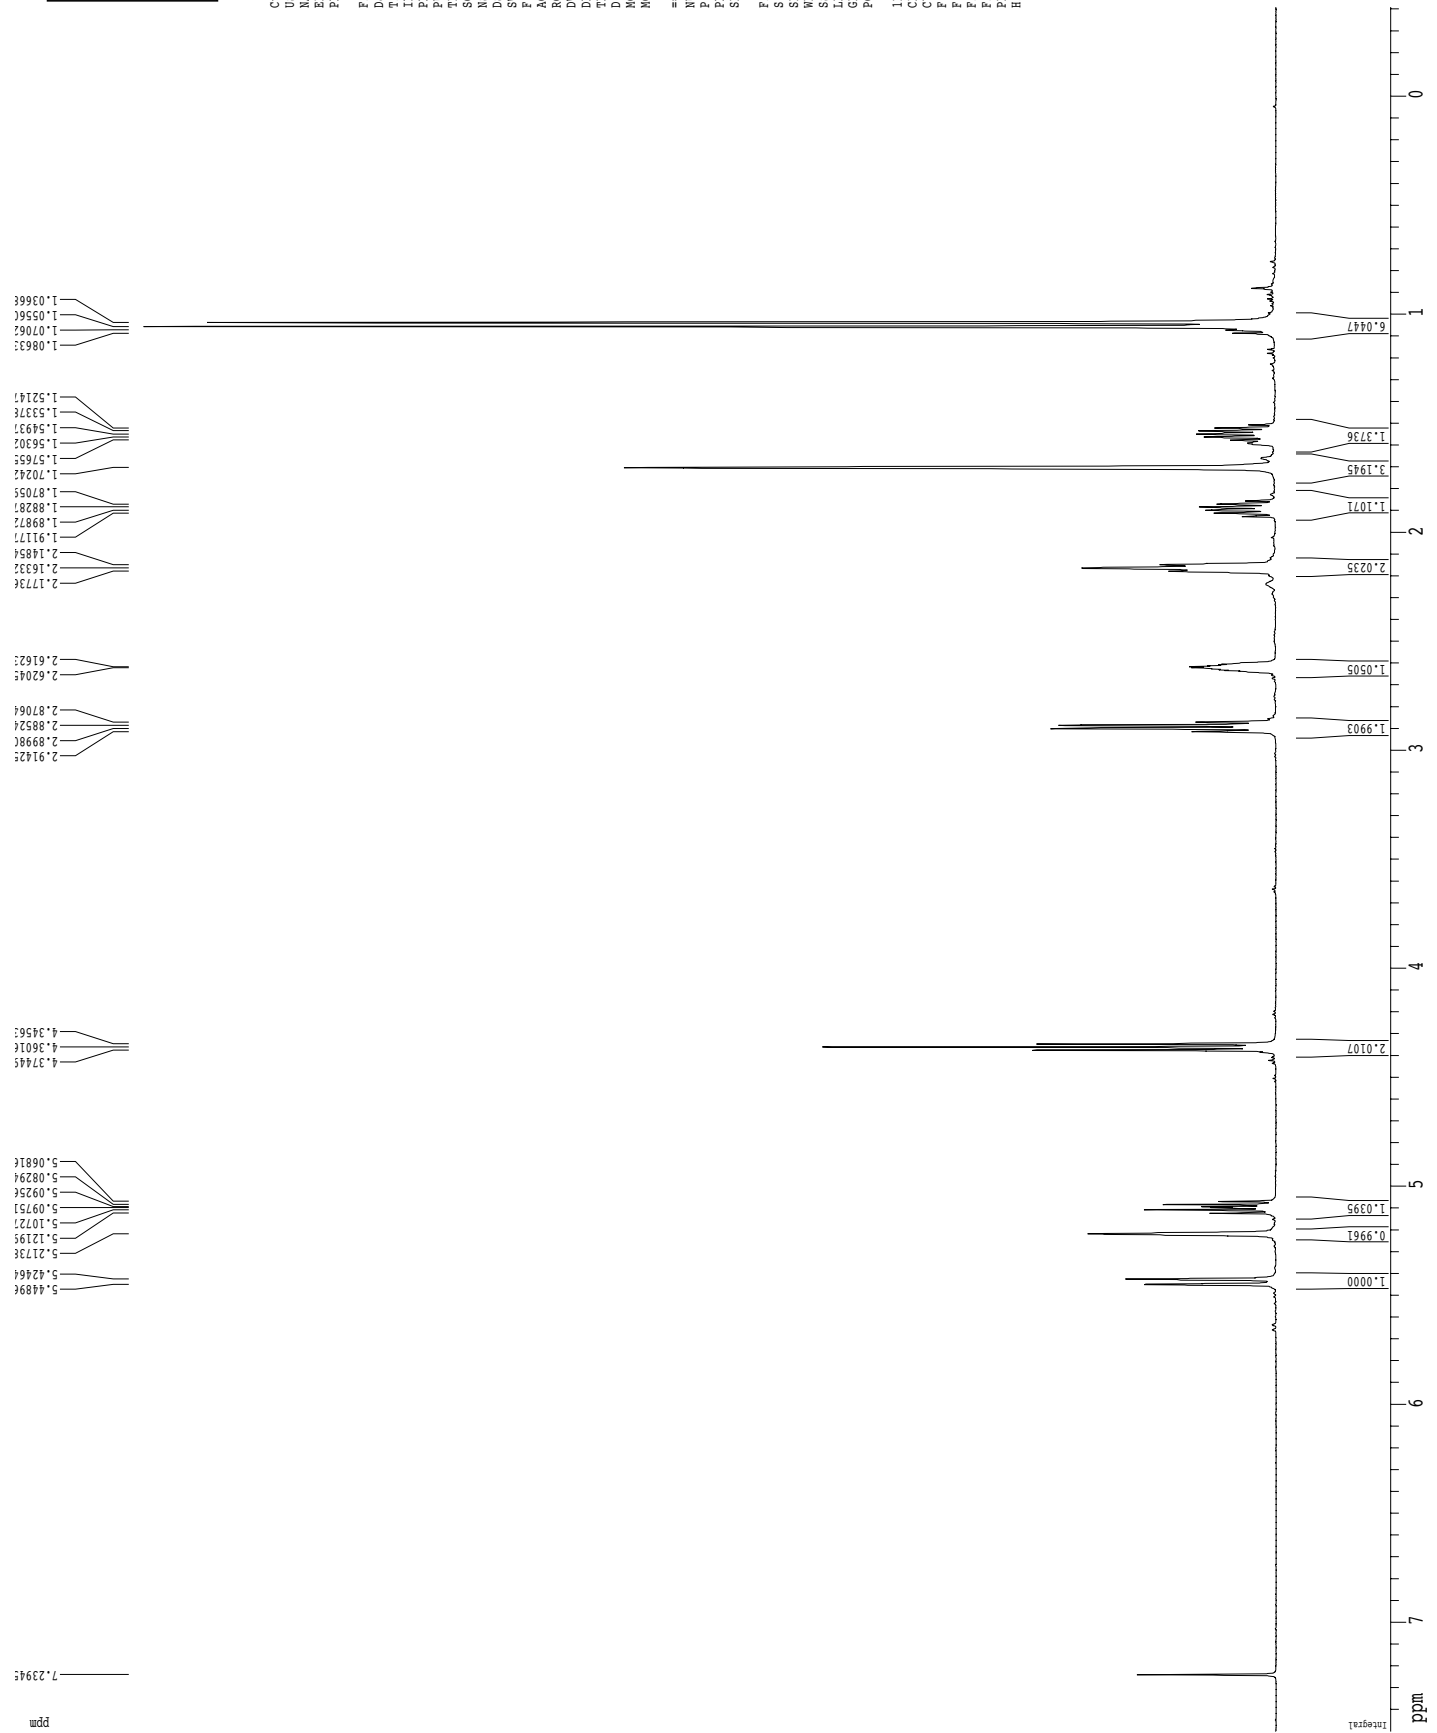

# Z-restored spin-echo <sup>13</sup>C spectrum with <sup>1</sup>H decoupling

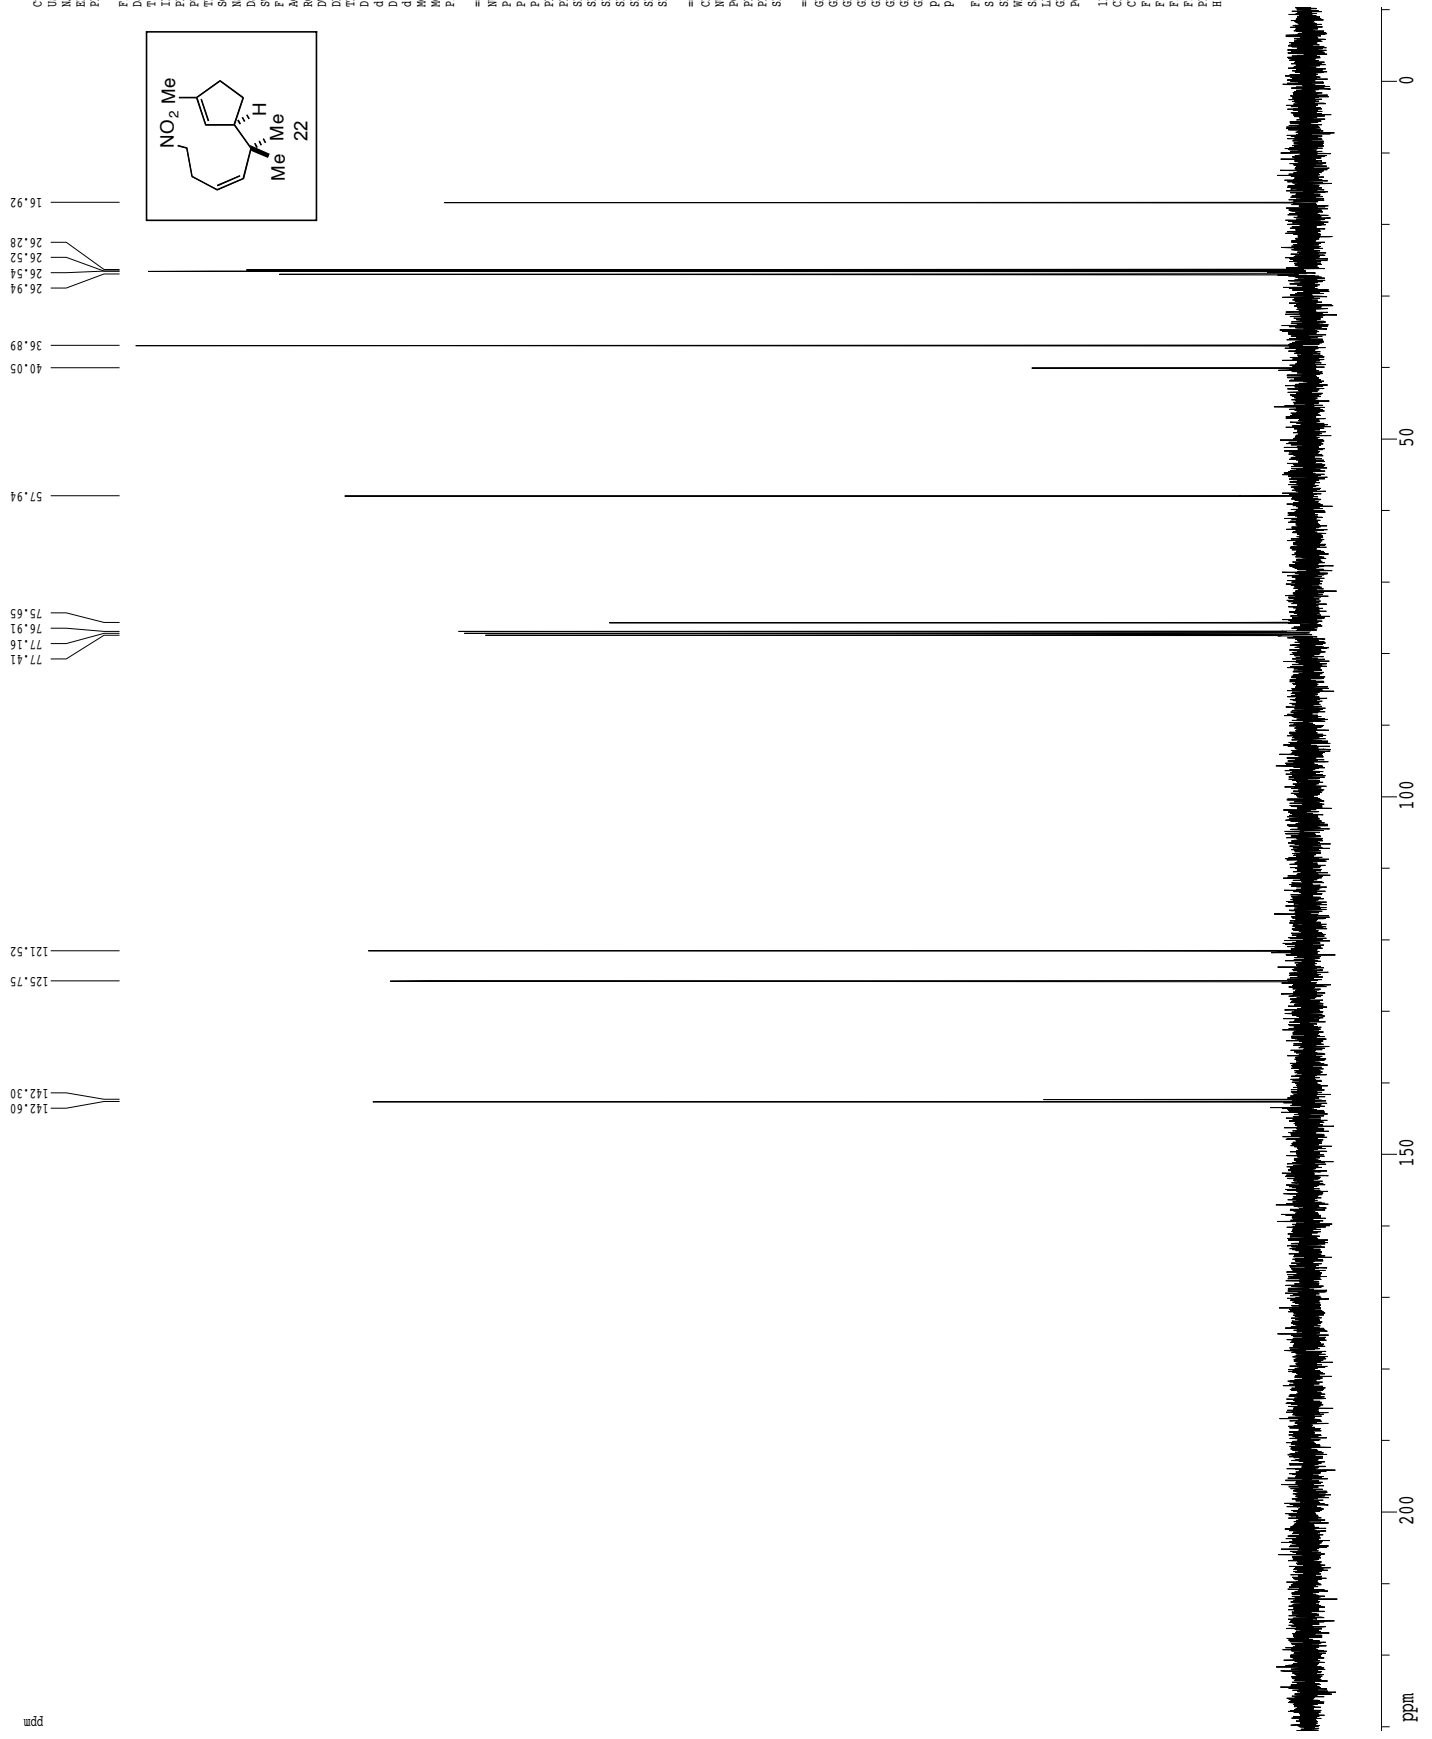

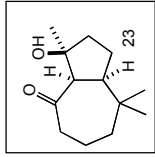

Current Data Parameters  
 USER schner  
 NAME ms003-121-3c13  
 EXPNO 1  
 PROCNO 1

F2 - Acquisition Parameters  
 Date\_ 20101004  
 Time 12:23  
 INSTRUM cryo500  
 PULPROG zgpg30  
 FIDRES 0.098043 Hz  
 AQ 5.0998774 sec  
 RG 5.7  
 DW 62.400 usec  
 DE 6.00 usec  
 TE 298.0 K  
 MCFRESF 0.1000000 sec  
 MCHNK 0.01500000 sec  
 ===== CHANNEL f1 =====  
 NUCL 1H  
 P1 7.50 usec  
 PL1 1.60 dB  
 SFO1 500.2235015 MHz

F2 - Processing parameters  
 SI 65536  
 SF 500.2200420 MHz  
 WDW EM  
 SS 0  
 LB 0.30 Hz  
 GB 0  
 PC 4.00

1D NMR plot parameters  
 CX 22.80 cm  
 CY 15.00 cm  
 F1P 7.272 ppm  
 F1 3637.44 Hz  
 F2P -0.738 ppm  
 F2 -368.97 Hz  
 PRCH 0.33128 ppm/cm  
 HZCX 175.71974 Hz/cm

0.71671  
0.84653  
0.88906  
1.18156  
1.20596  
1.23046  
1.26942  
1.28424  
1.30200  
1.32332  
1.34696  
1.47021  
1.47583  
1.48015  
1.48433  
1.49596  
1.50594  
1.51493  
1.56402  
1.57716  
1.60076  
1.62480  
1.62817  
1.64064  
1.64427  
1.65006  
1.65425  
1.66666  
1.67003  
1.74872  
1.76870  
1.77280  
1.92831  
1.94452  
1.94861  
1.95355  
1.96981  
1.97455  
2.04366  
2.05343  
2.05903  
2.07868  
2.08624  
2.09615  
2.11495  
2.12164  
2.13921  
2.14585  
2.14585  
2.22236  
2.43948  
2.59834  
2.62011

4.53431  
4.53016

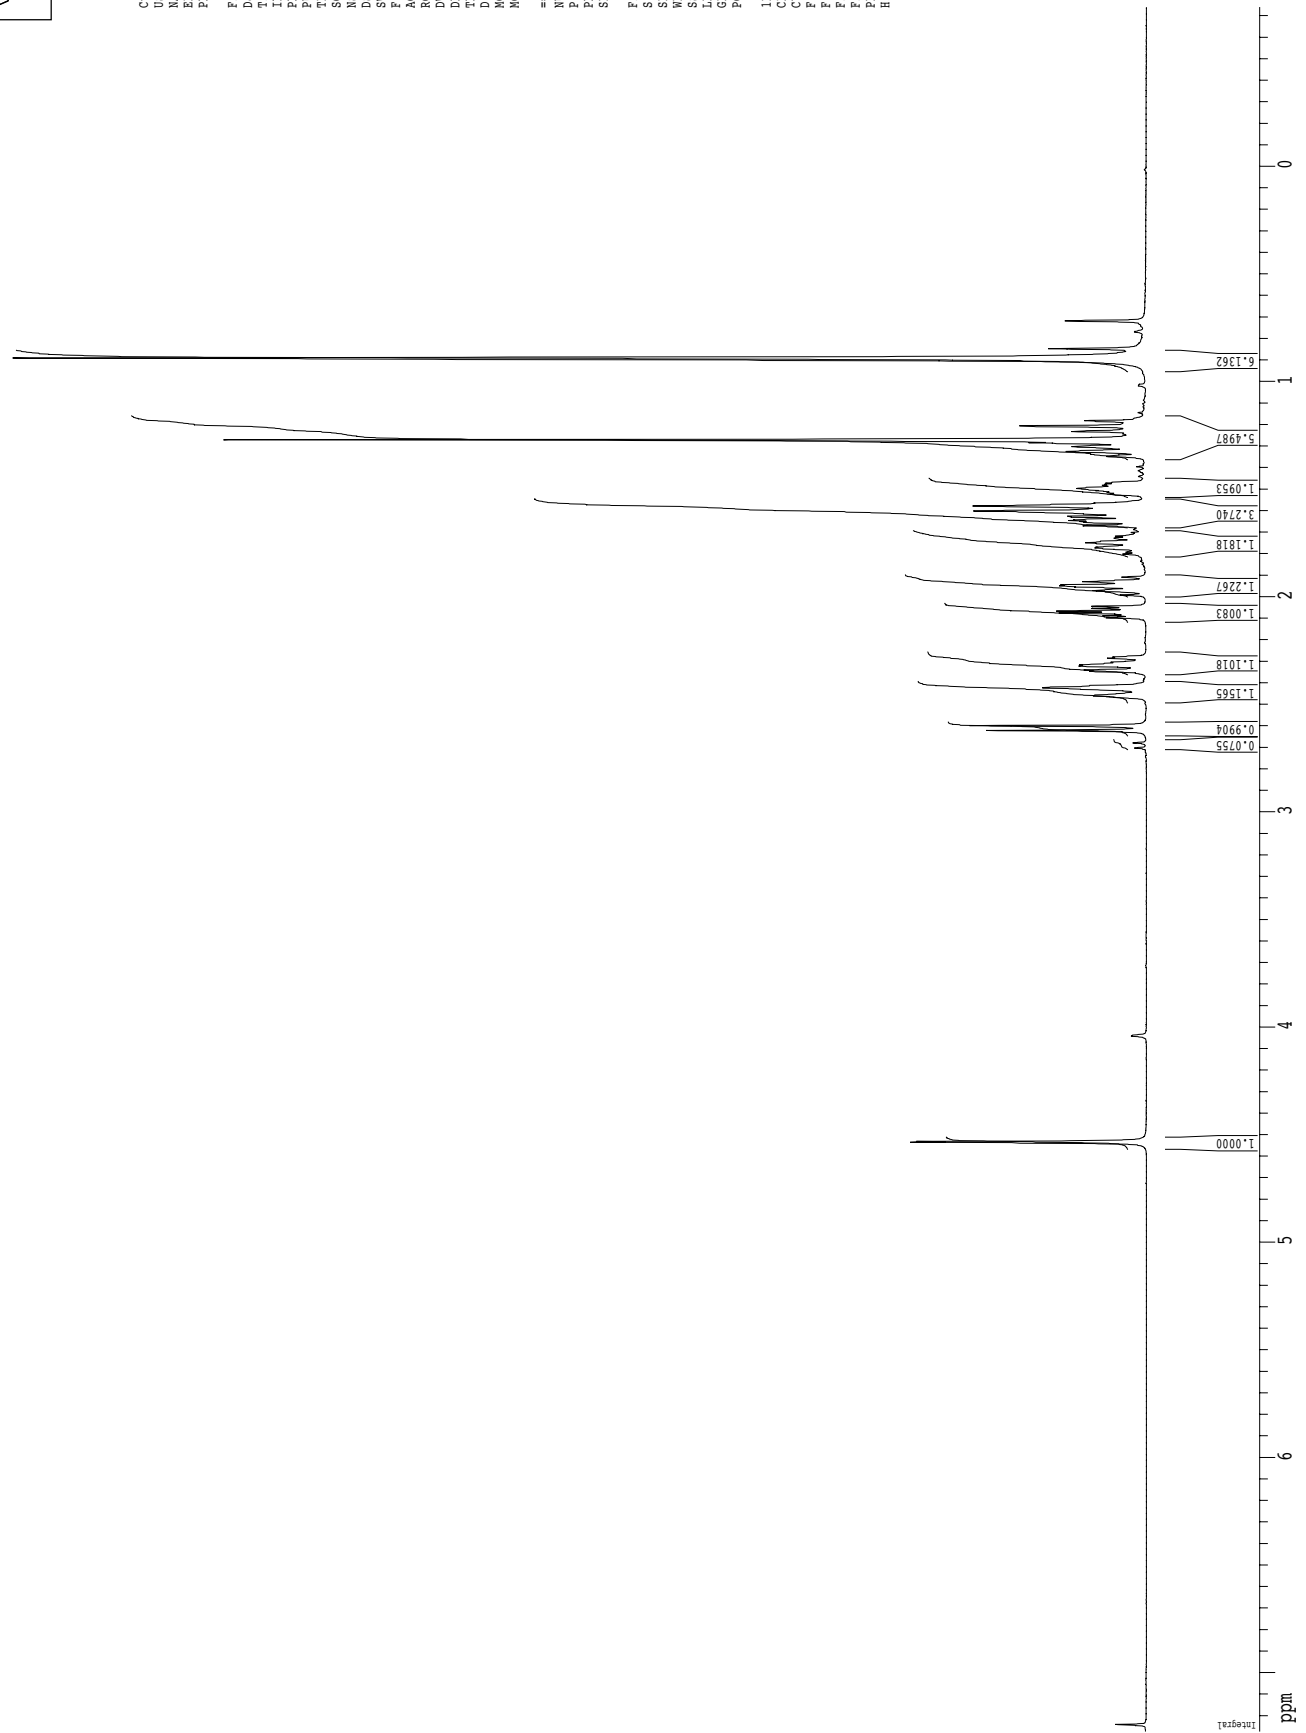

Integral  
ppm

Z-restored spin-echo <sup>13</sup>C spectrum with <sup>1</sup>H decoupling

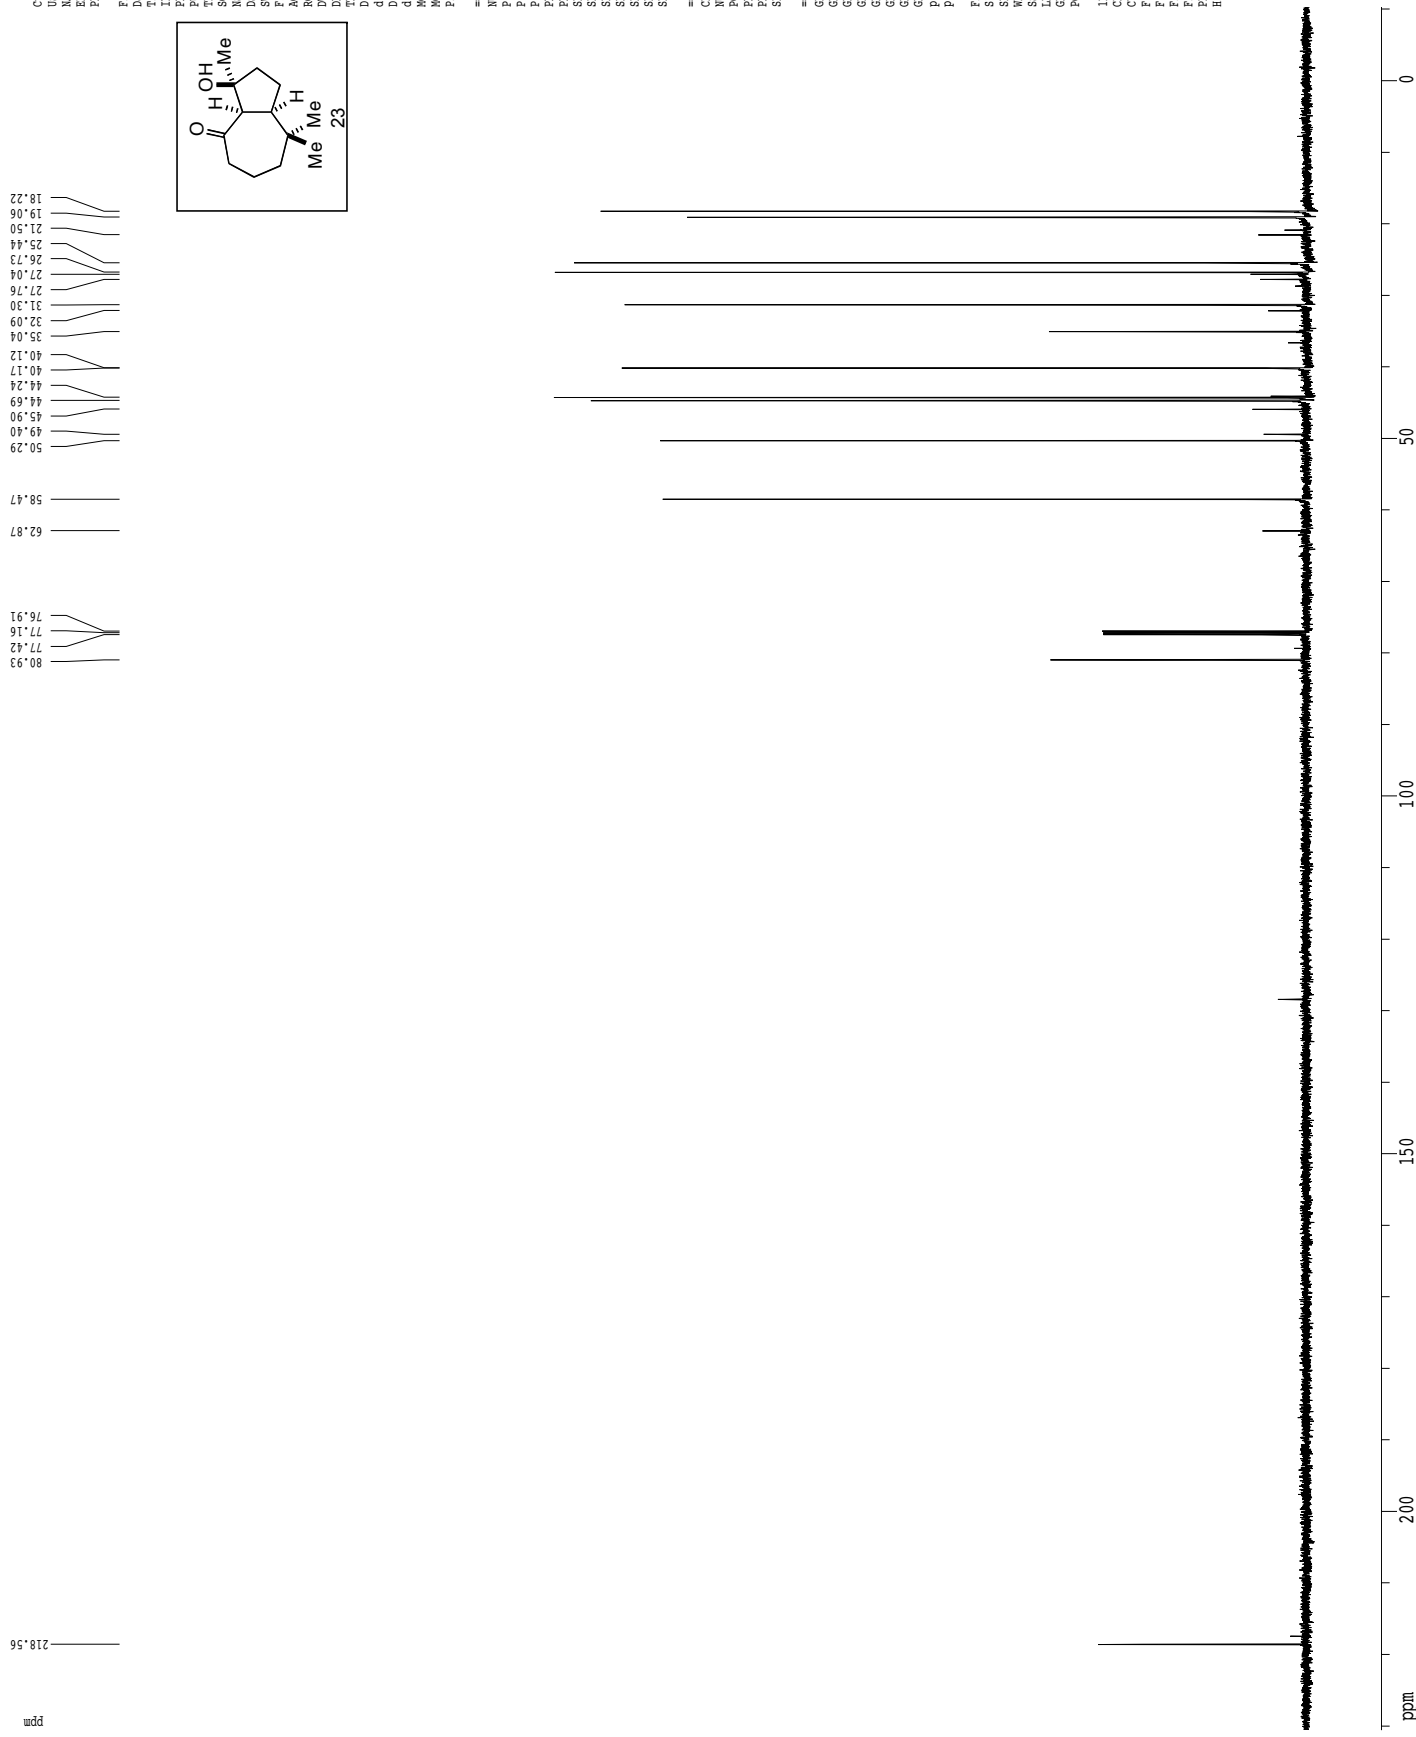



1H spectrum

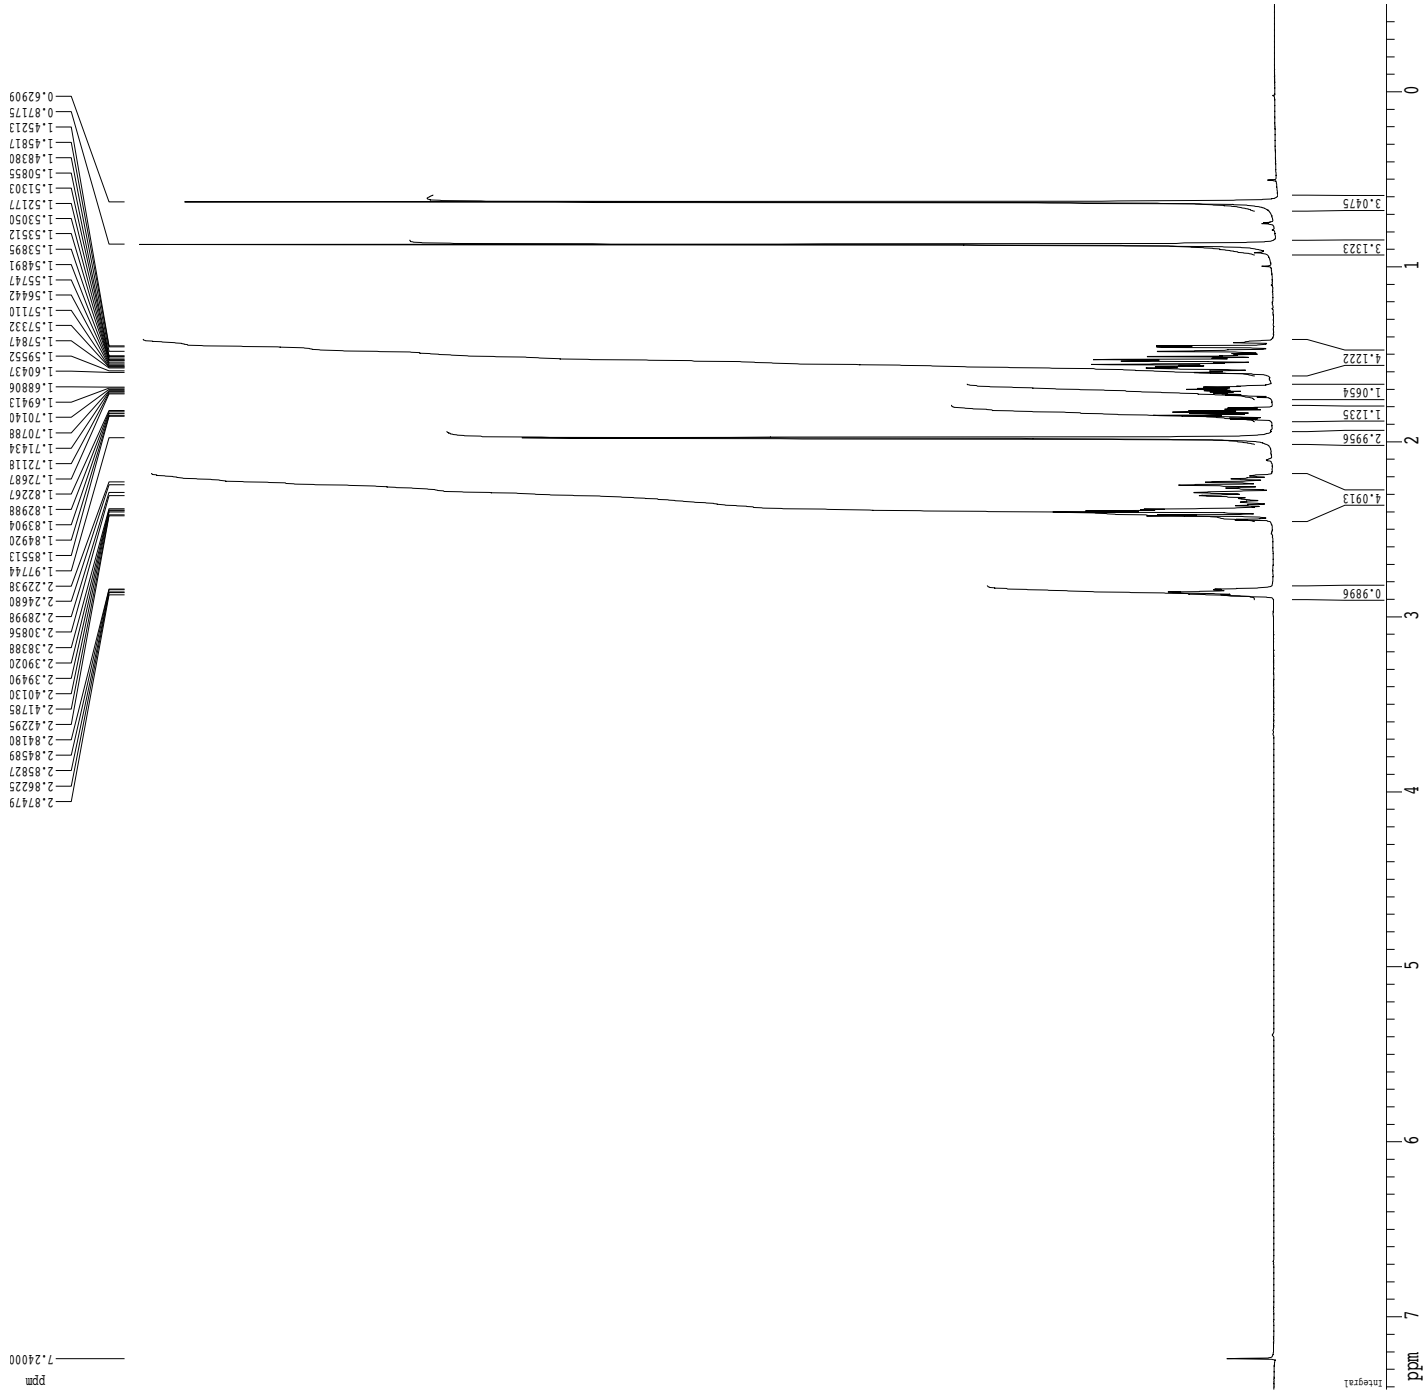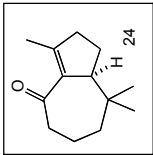

Current Data Parameters  
 USER schner  
 NAME ms003-13-3-c13  
 EXPNO 1  
 PROCNO 1

F2 - Acquisition Parameters  
 Date\_ 20100614  
 Time 17.60  
 INSTRUM cryo500  
 PROBRID 5 mm CPYCI 1H-  
 PULPROG zg30  
 TD 81728  
 SOLVENT CDCl3  
 NS 10  
 DS 2  
 SWH 8012.820 Hz  
 FIDRES 0.098043 Hz  
 AQ 5.0998774 sec  
 RG 32  
 SW 62.40 usec  
 DE 6.00 usec  
 TE 288.0 K  
 D1 0.10000000 sec  
 MCREST 0.00000000 sec  
 MCWRR 0.01500000 sec

==== CHANNEL f1 =====  
 NUC1 1H  
 P1 7.50 usec  
 PL1 1.00 dB  
 SFO1 500.2235015 MHz

F2 - Processing parameters  
 SI 65536  
 SF 500.2204320 MHz  
 GPCSS 0  
 MDW EM  
 SSB 0  
 LB 0.30 Hz  
 GB 0  
 PC 4.00

1D NMR plot parameters  
 CX 18.22 cm  
 CY 15.00 cm  
 FIP 7.414 ppm  
 FZ 3706.89 Hz  
 F2 -249.75 ppm  
 PRMCH 0.43194 ppm/cm  
 HZCN 216.06465 Hz/cm

Z-restored spin-echo <sup>13</sup>C spectrum with <sup>1</sup>H decoupling

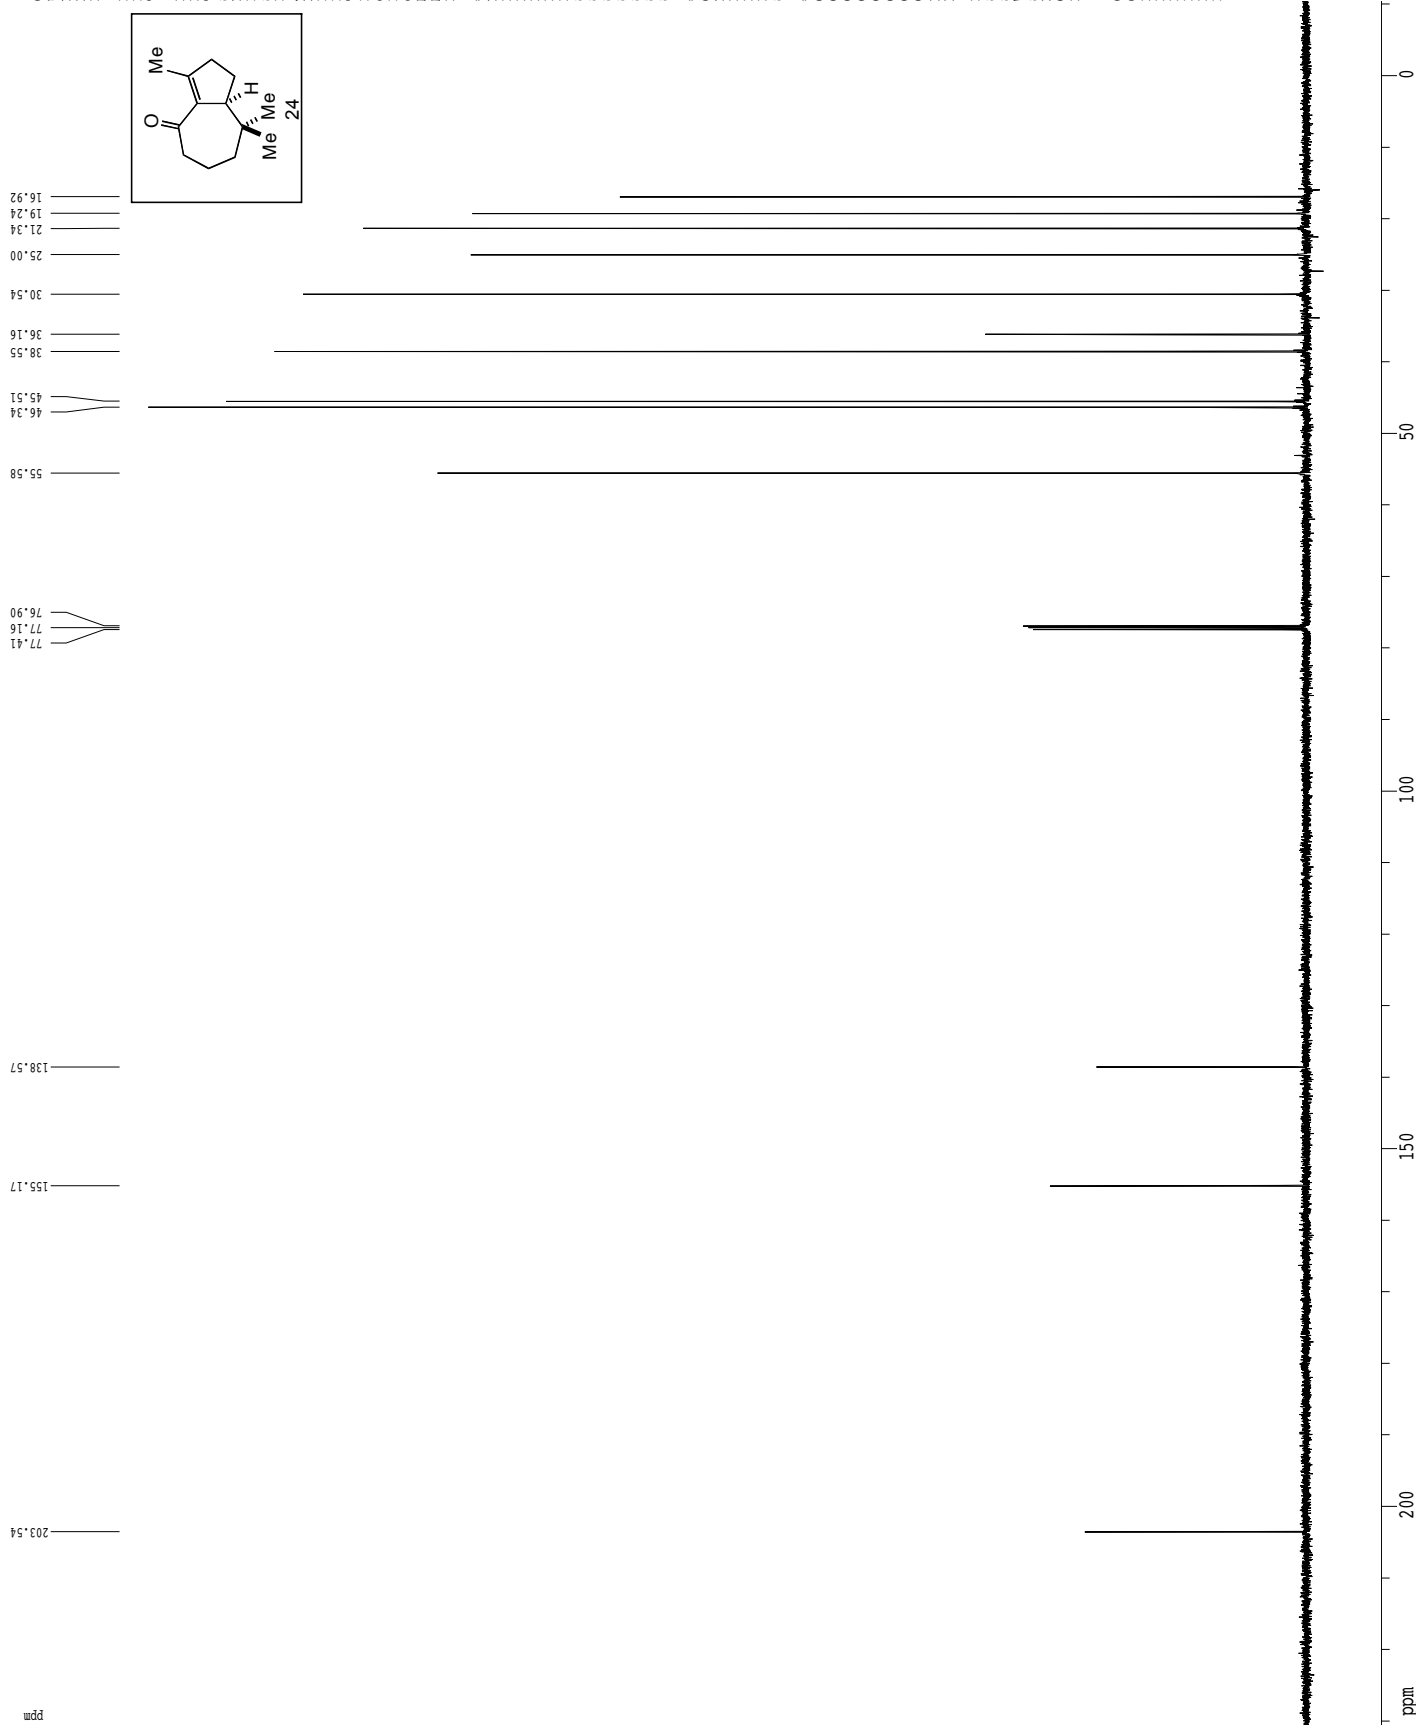

1H spectrum

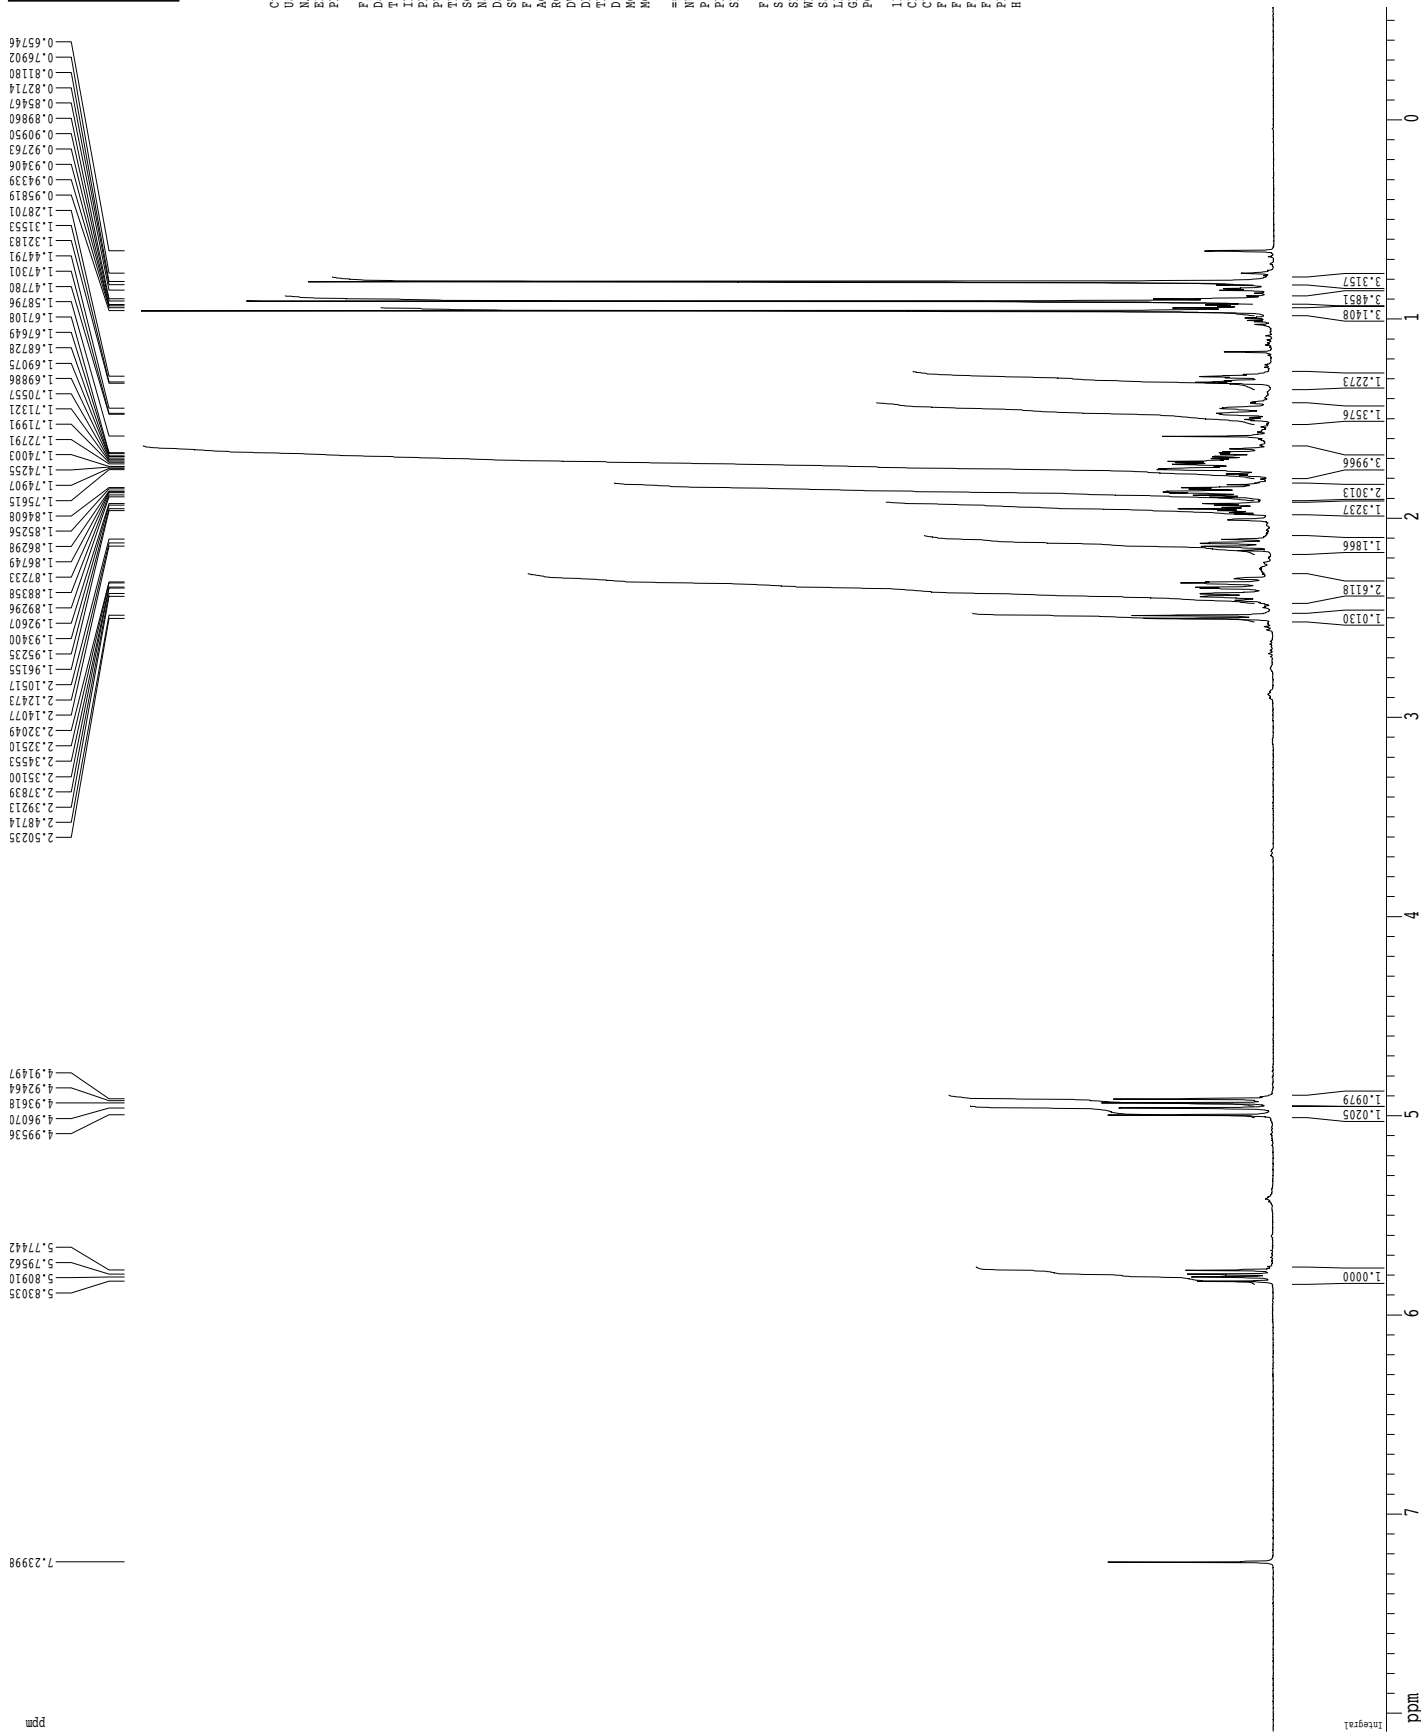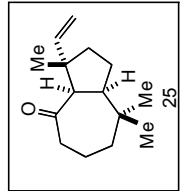

Current Data Parameters  
 USER schner  
 NAME m184-206a-3  
 EXPNO 1  
 PROCNO 1

F2 - Acquisition Parameters  
 Date\_ 20120328  
 Time 15:35  
 NS/SM 93060  
 PULPROG 5 mm broadband  
 FIDRES 0.098043 Hz  
 TD 81728  
 SOLVENT CDCl3T  
 NS 4  
 DS 2  
 SWH 8012.820 Hz  
 FIDRES 0.098043 Hz  
 AQ 5.0998774 sec  
 RG 128  
 DW 62.400 usec  
 DE 6.00 usec  
 TE 298.0 K  
 MCKEY 0.1000000 sec  
 MCKEY 0.0000000 sec  
 MCKEY 0.0150000 sec

==== CHANNEL f1 =====  
 NUC1 1H  
 P1 12.20 usec  
 PL1 -5.00 dB  
 SFO1 499.4034958 MHz

F2 - Processing parameters  
 SI 65536  
 SF 499.4000419 MHz  
 DM 8192  
 GB 0  
 TB 0  
 CB 0.30 Hz  
 GB 1.00  
 PC 1.00

1D NMR plot parameters  
 CX 22.80 cm  
 CY 15.00 cm  
 F1 4039.51 Hz  
 F2 -0.564 ppm  
 F2 281.43 Hz  
 PRCH 0.37952 ppm/cm  
 HZCX 184.53255 Hz/cm

**<sup>13</sup>C spectrum with <sup>1</sup>H decoupling**

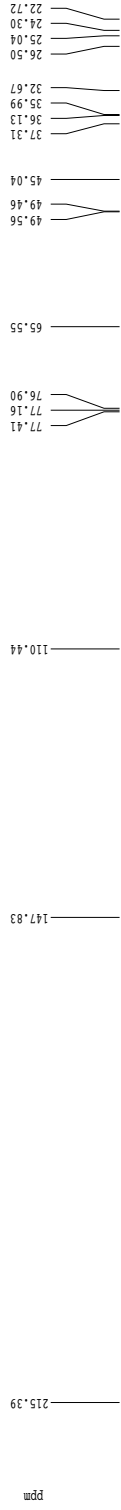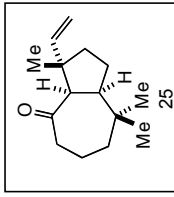

Current Data Parameters  
 USER schmer  
 NAME mjs4-206a-3  
 EXPNO 2  
 PROCNO 1

F2 - Acquisition Parameters  
 Date\_ 20120328  
 Time 15.36  
 INSTRUM gwb00  
 PROBDW 5 mm broadband  
 PULPROG zgpg30  
 TD 6536  
 SOLVENT CDCl3  
 NS 68  
 DS 4  
 SWH 30303.031 Hz  
 FIDRES 0.462388 Hz  
 AQ 1.0813940 sec  
 RG 46341  
 DW 16.500 usec  
 DE 4.50 usec  
 TE 298.0 K  
 D1 0.25000000 sec  
 d11 0.03000000 sec  
 MCREST 0.00000000 sec  
 MCPRK 0.01500000 sec

==== CHANNEL f1 =====  
 NUC1 <sup>13</sup>C  
 P1 1.70 usec  
 PL1 0.00 dB  
 SF01 125.5880432 MHz

==== CHANNEL f2 =====  
 CPDPRG2 waltz16  
 NUC2 <sup>1</sup>H  
 PCPD2 80.00 usec  
 PL2 -3.00 dB  
 PL12 13.20 dB  
 SF02 499.4024970 MHz

F2 - Processing parameters  
 SI 65536  
 SF 125.5742178 MHz  
 MDW EN  
 SSB 0  
 LB 1.00 Hz  
 GB 0  
 PC 2.00

ID NMR plot parameters  
 CX 22.80 cm  
 CY 15.65 cm  
 E1P 229.520 ppm  
 F1 28821.76 Hz  
 F2P -10.507 ppm  
 F2 -1319.36 Hz  
 PPMCM 10.52747 ppm/cm  
 HZCM 1321.97864 Hz/cm

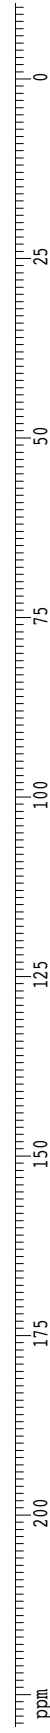

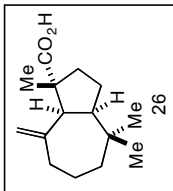

Current Data Parameters  
 USER schner  
 NAME m184-1981-2c13  
 EXPNO 1  
 PROCNO 1

F2 - Acquisition Parameters  
 Date\_ 20120314  
 Time 15:16  
 INSTRUM cryo500  
 PULPROG zgpg30  
 FIDRES 5 mm CPXCL 420  
 TD 81728  
 SOLVENT 6666  
 NS 4  
 DS 2  
 SWH 8012.820 Hz  
 FIDRES 0.098043 Hz  
 AQ 5.0998774 sec  
 RG 4  
 DW 62.400 usec  
 DE 6.00 usec  
 TE 298.0 K  
 MCFREQ 0.1000000 sec  
 MCHNK 0.01500000 sec  
 ===== CHANNEL f1 =====  
 NUCL 1H  
 P1 7.50 usec  
 PL1 1.60 dB  
 SFO1 500.2235015 MHz

F2 - Processing parameters  
 SI 65536  
 SF 500.2200556 MHz  
 WDW EM  
 SS 0  
 GB 0  
 PC 4.00

1D NMR plot parameters  
 CX 22.80 cm  
 CY 35.00 cm  
 F1 7.774 ppm  
 F2 3888.48 Hz  
 F3 -0.116 ppm  
 F4 -58.14 Hz  
 PRCH 0.38604 ppm/cm  
 HZCX 173.09708 Hz/cm

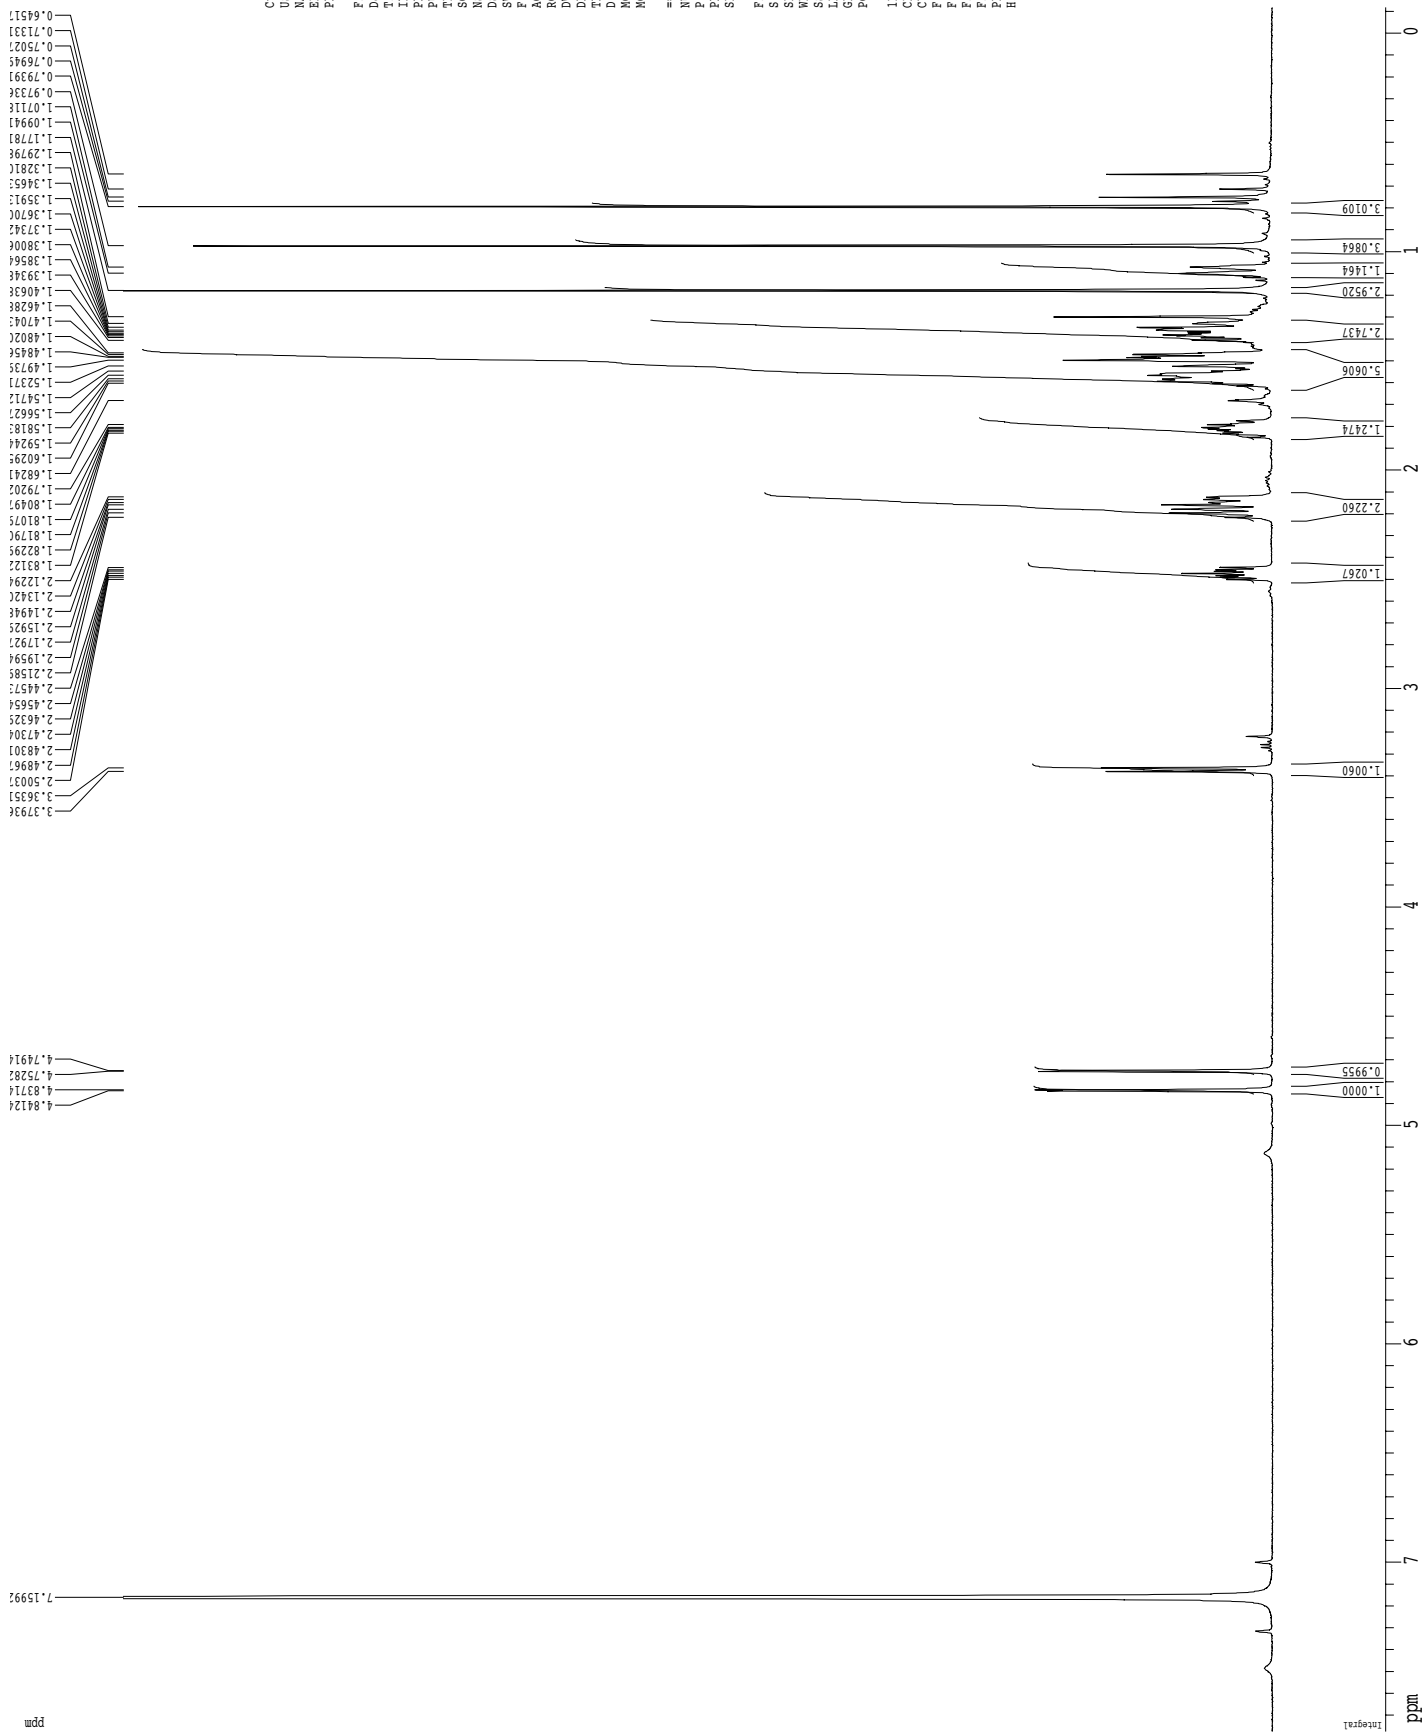

Z-restored spin-echo <sup>13</sup>C spectrum with <sup>1</sup>H decoupling

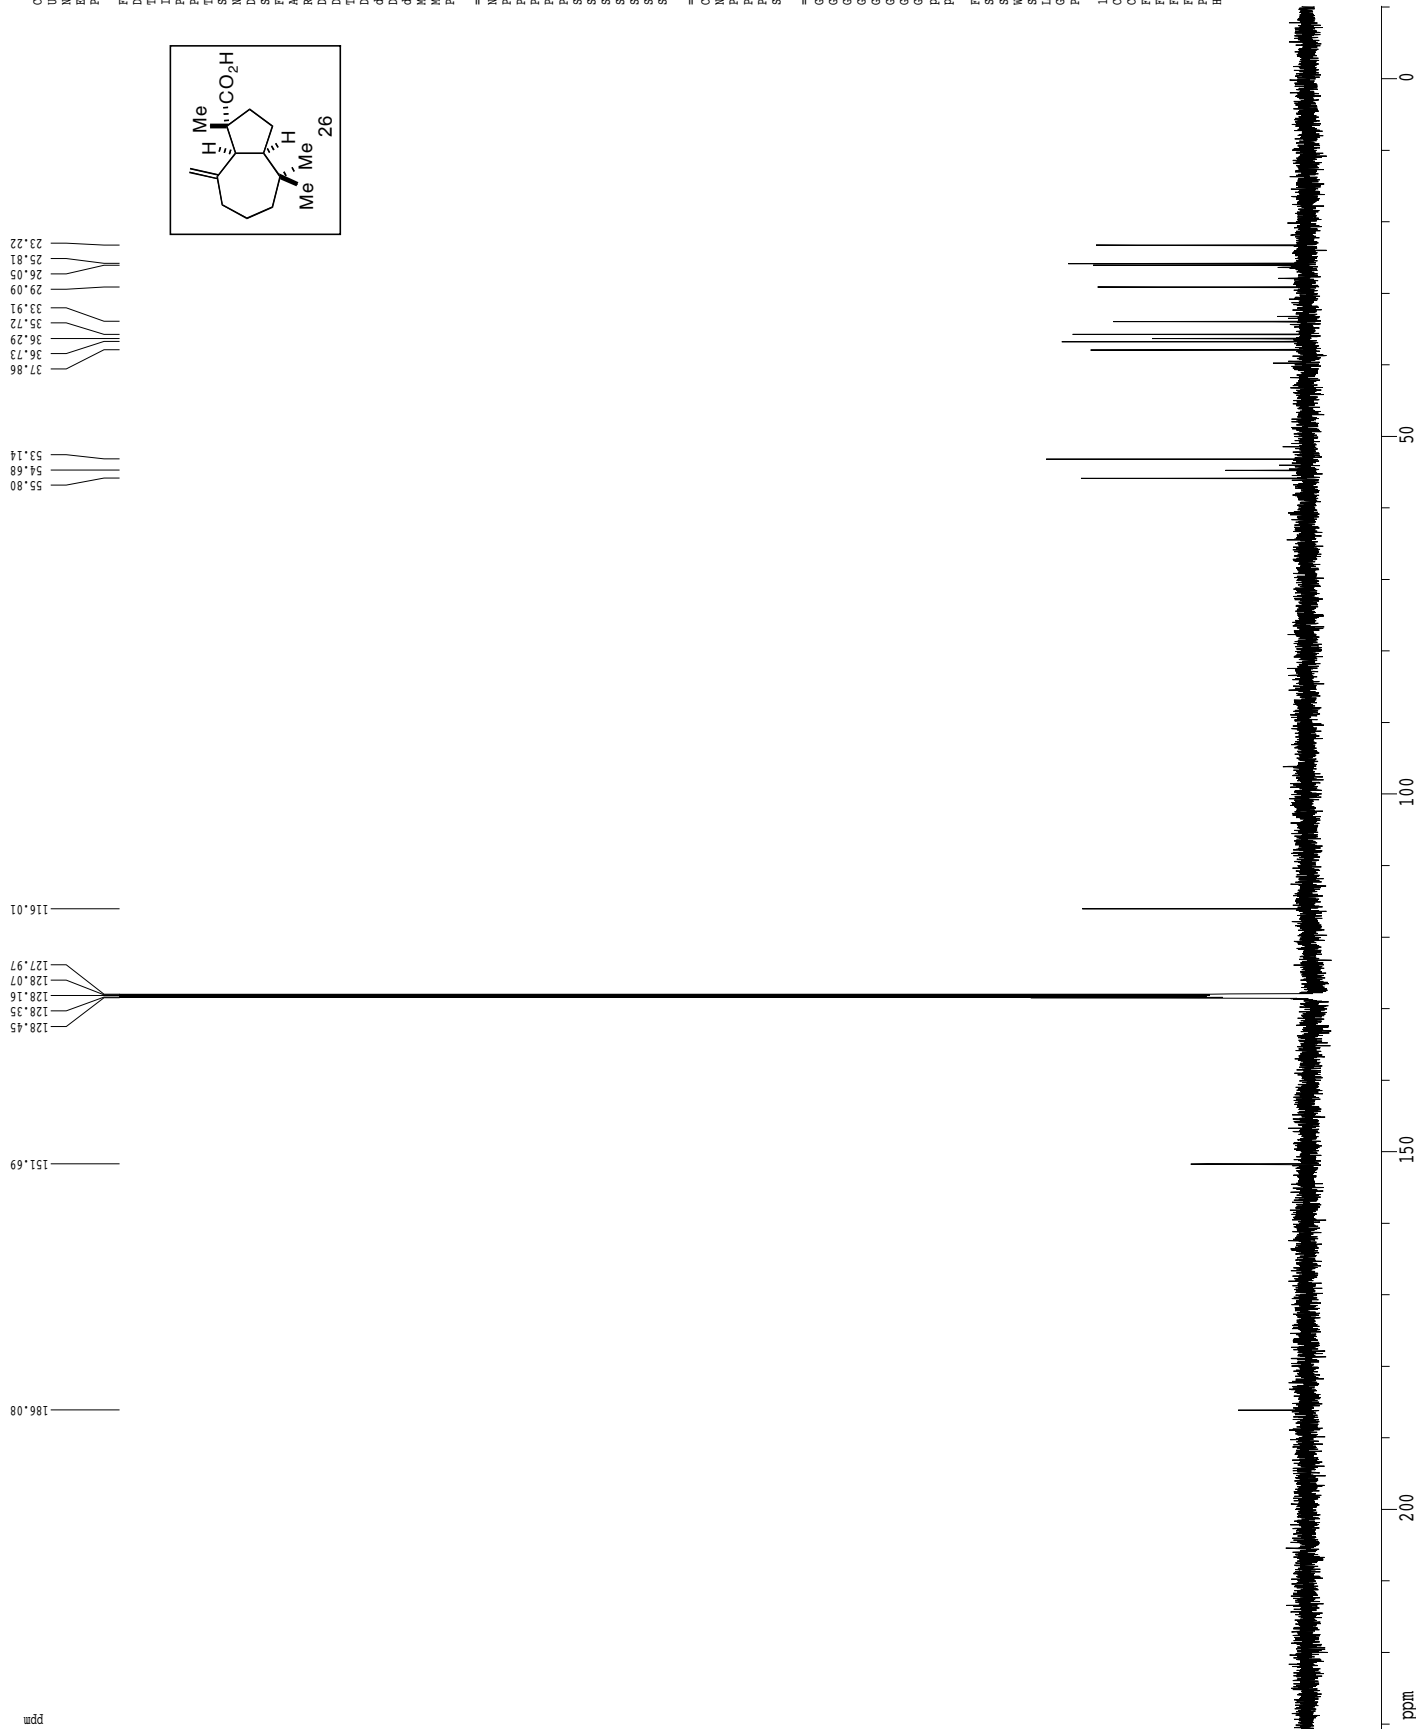

Current Data Parameters  
 USER schmer  
 EXPNO 1  
 PROCNO 1

F2 - Acquisition Parameters  
 Date\_ 20120517  
 Time 13.04  
 INSTRUM cryo500  
 PROBRID 5 mm CPAC1 JH  
 PULPROG zgpg30  
 TD 65536  
 SOLVENT CDCl3  
 NS 53  
 DS 16  
 SWH 30303.031 Hz  
 FIDRES 0.462388 Hz  
 AQ 1.0815940 sec  
 RG 2896.75  
 DR 6.00 usec  
 DE 6.00 usec  
 TE 298.2 K  
 D1 0.25000000 sec  
 d11 0.03000000 sec  
 D16 0.00020000 sec  
 d17 0.00015600 sec  
 ACRESF 0.00000000 sec  
 ACWRK 0.01500000 sec  
 F2 3.00 usec

===== CHANNEL F1 =====  
 NUC1 <sup>13</sup>C  
 P1 15.50 usec  
 PL1 500.00 usec  
 PL2 2000.00 usec  
 PL0 120.00 dB  
 PL1 125.794568 dB  
 PL2 125.794568 dB  
 SP1 3.20 dB  
 SP2 3.20 dB  
 SFO1 Ccp60.0.5.20.1  
 SFO2 Ccp60.0.5.20.1  
 SFOFF1 0.00 Hz  
 SFOFF2 0.00 Hz

===== CHANNEL F2 =====  
 CDPGRZ wd t g1 6  
 NUC2 <sup>1</sup>H  
 PCPD2 100.00 usec  
 PL2 1.60 dB  
 PL12 24.60 dB  
 SFO2 500.2225011 MHz

===== GRADIENT CHANNEL =====  
 GRAB1 20.00 usec  
 GRAB2 20.00 usec  
 GRAB3 20.00 usec  
 GRAB4 20.00 usec  
 GRAB5 20.00 usec  
 GRAB6 20.00 usec  
 GRAB7 20.00 usec  
 GRAB8 20.00 usec  
 GRAB9 20.00 usec  
 GRAB10 20.00 usec  
 GRAB11 20.00 usec  
 GRAB12 20.00 usec  
 GRAB13 20.00 usec  
 GRAB14 20.00 usec  
 GRAB15 20.00 usec  
 GRAB16 20.00 usec

F2 - Processing parameters  
 SI 65536  
 SF 125.7803760 MHz  
 WDW EM  
 SSB 0  
 LB 1.00 Hz  
 GB 0  
 PC 2.00

ID NMR plot parameters  
 CX 22.80 cm  
 CY 65.00 cm  
 FIP 230.637 ppm  
 F1 29005.67 Hz  
 F2 -10.287 ppm  
 FZ 1295.96 Hz  
 F3 10.568 ppm/cm  
 HZCM 1329.10857 Hz/cm

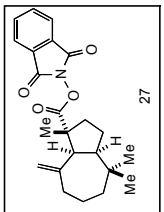

Current Data Parameters  
 USER schner  
 NAME mjs4-1411-3  
 EXPNO 1  
 PROCNO 1

F2 - Acquisition Parameters  
 Date\_ 2011118  
 Time 10:17  
 INSTRUM cryo300  
 PROBHD 5 mm CPXI 1.4  
 PULPROG zgpg30  
 TD 81728  
 SOLVENT CDCl3  
 NS 5  
 DS 2  
 SWH 8012.820 Hz  
 FIDRES 0.098043 Hz  
 AQ 5.0998774 sec  
 RG 4.5  
 DW 62.400 usec  
 DE 6.00 usec  
 TE 298.0 K  
 MCFRESF 0.1000000 sec  
 MCHNK 0.01500000 sec

==== CHANNEL f1 =====  
 NU1 1H  
 P1 7.50 usec  
 PL1 1.60 dB  
 SFO1 500.2235015 MHz

F2 - Processing parameters  
 SI 65536  
 SF 500.2199872 MHz  
 WDW EM  
 SS 0  
 GB 0  
 PC 4.00

ID NMR plot parameters  
 CX 22.80 cm  
 CY 15.00 cm  
 F1 9.265 ppm  
 F2 4634.57 Hz  
 F3 -0.314 ppm  
 F4 -157.18 Hz  
 PRCH 0.42014 ppm/cm  
 HZCX 210.16432 Hz/cm

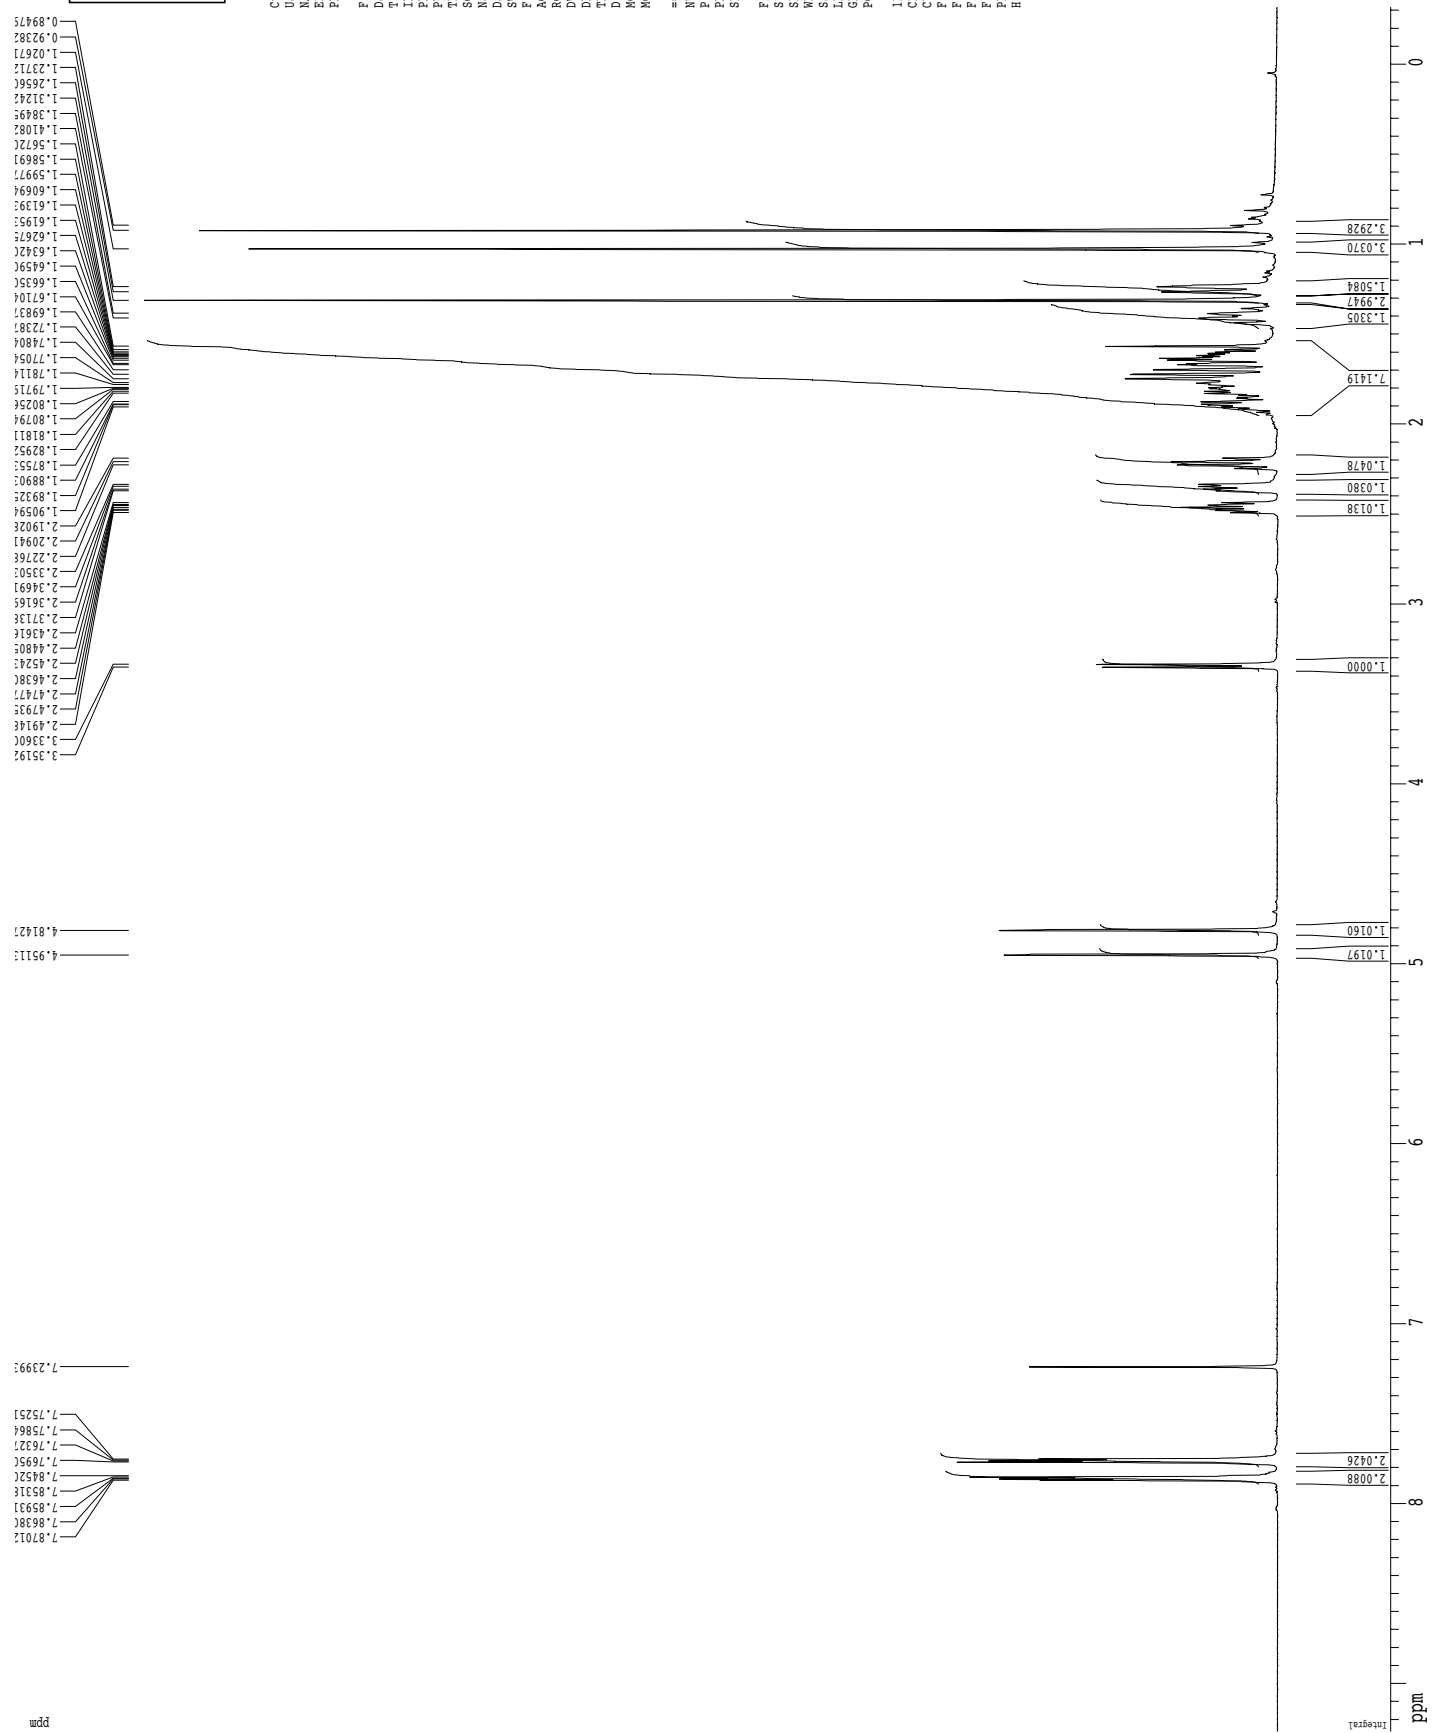





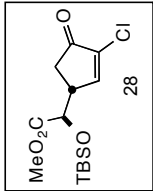

Current Data Parameters  
 USER schner  
 NAME m3st-217-3c13  
 EXPNO 1  
 PROCNO 1

F2 - Acquisition Parameters  
 Date\_ 20120523  
 Time 8:10  
 INSTRUM cryo100  
 PULPROG zgpg30  
 PREROG 5 mm CP131  
 TD 81728  
 SOLVENT CDCl3

NS 7  
 DS 2  
 SWH 8012.820 Hz  
 FIDRES 0.098043 Hz  
 AQ 5.0999398 sec  
 RG 5.7  
 DW 62.400 usec  
 DE 6.00 usec  
 TE 298.0 K  
 MCFRESF 0.1000000 sec  
 MCFRESR 0.0000000 sec  
 MCFRKK 0.01500000 sec

==== CHANNEL f1 =====  
 NUCL 1H  
 P1 7.50 usec  
 PL1 1.60 dB  
 SFO1 500.2235015 MHz

F2 - Processing parameters  
 SI 65536  
 SF 500.2200417 MHz  
 WDW EM  
 SS 0  
 GB 0  
 PC 4.00

1D NMR plot parameters  
 CX 22.80 cm  
 CY 15.00 cm  
 F1P 8.983 ppm  
 F1 4493.43 Hz  
 F2P -0.896 ppm  
 F2 -448.14 Hz  
 PRCH 0.43328 ppm/cm  
 HZCX 216.73543 Hz/cm

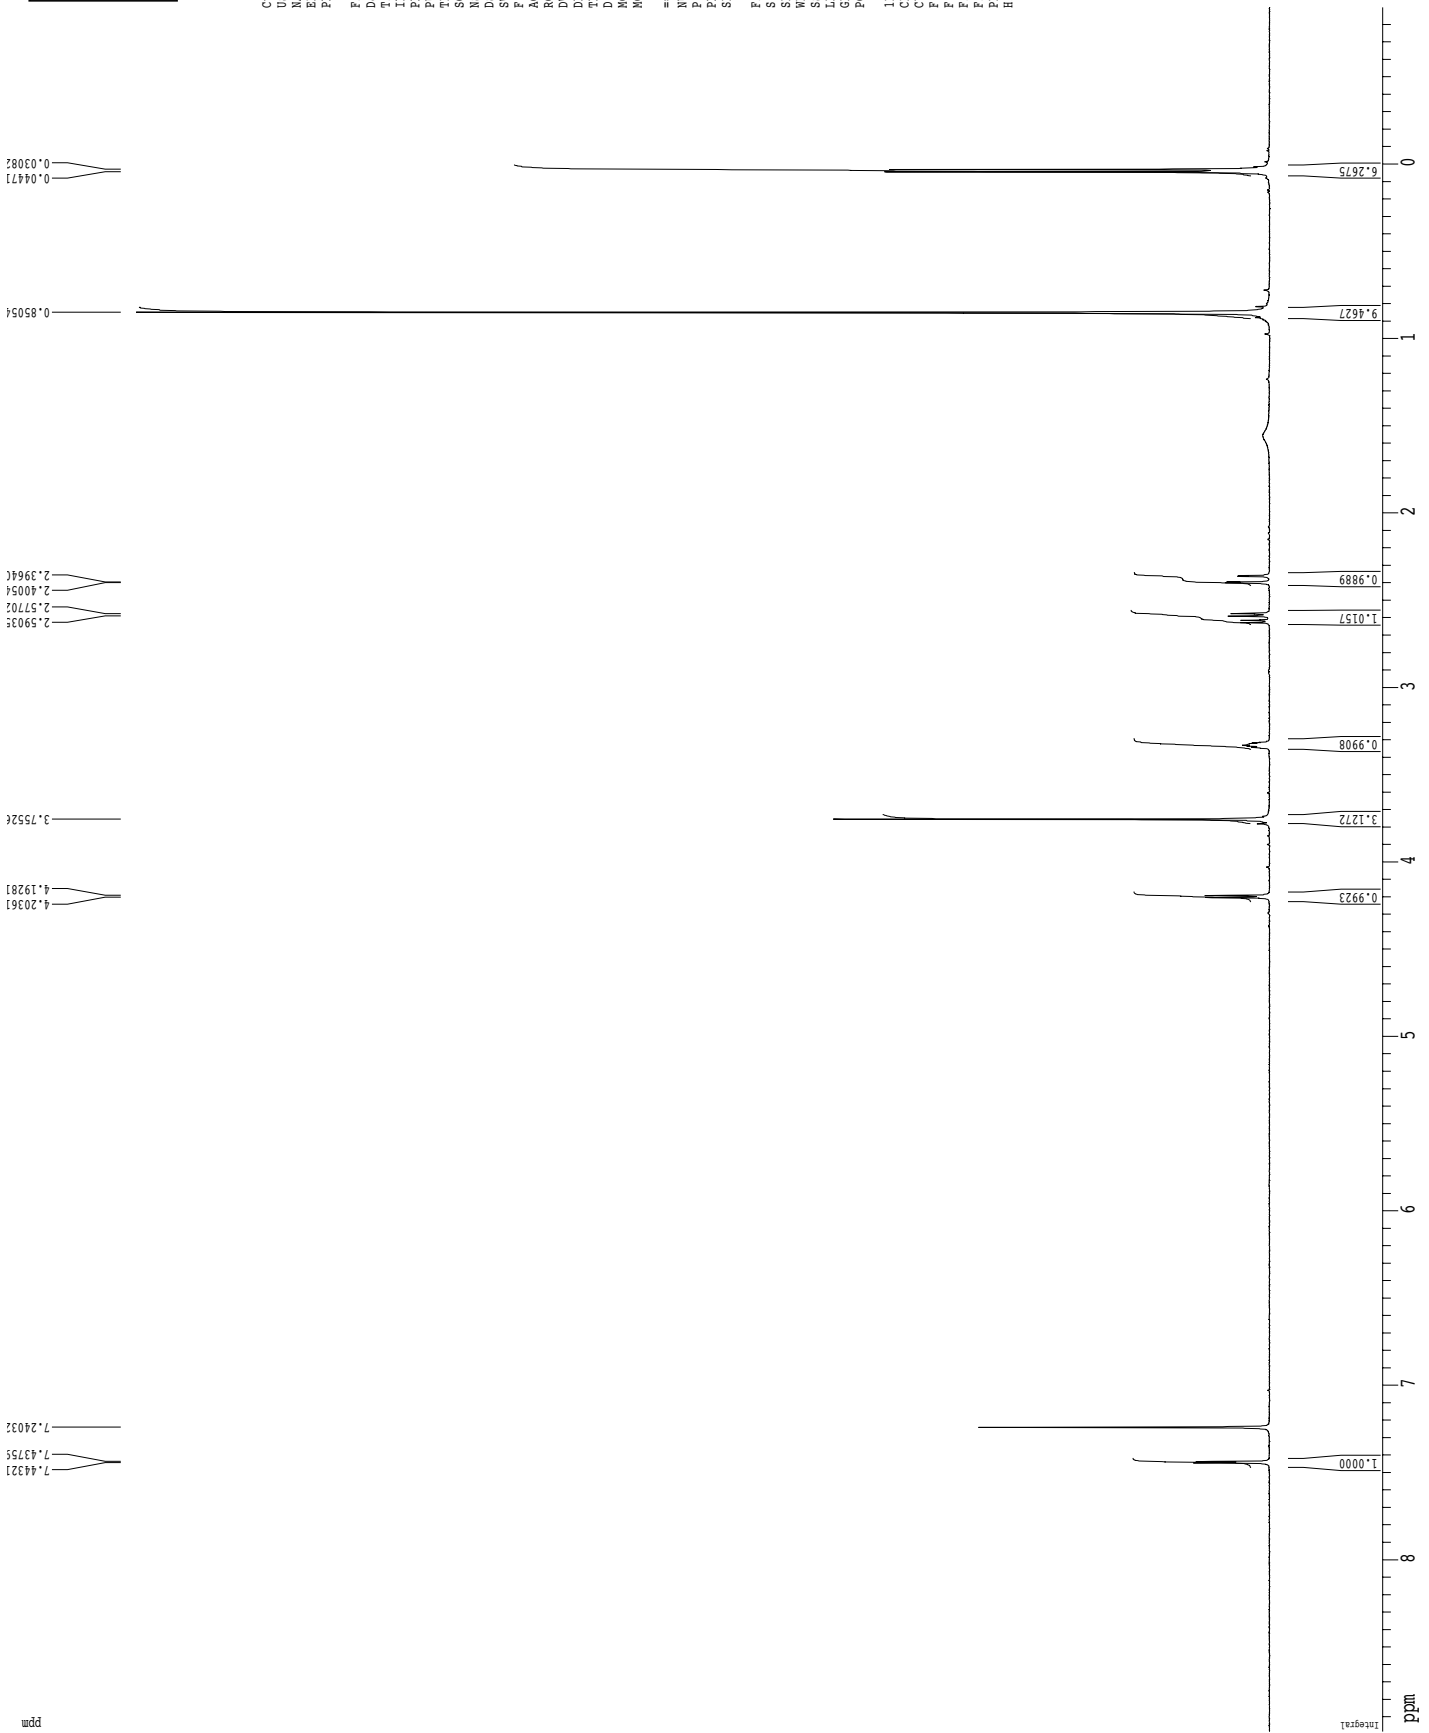

Z-restored spin-echo 13C spectrum with 1H decoupling

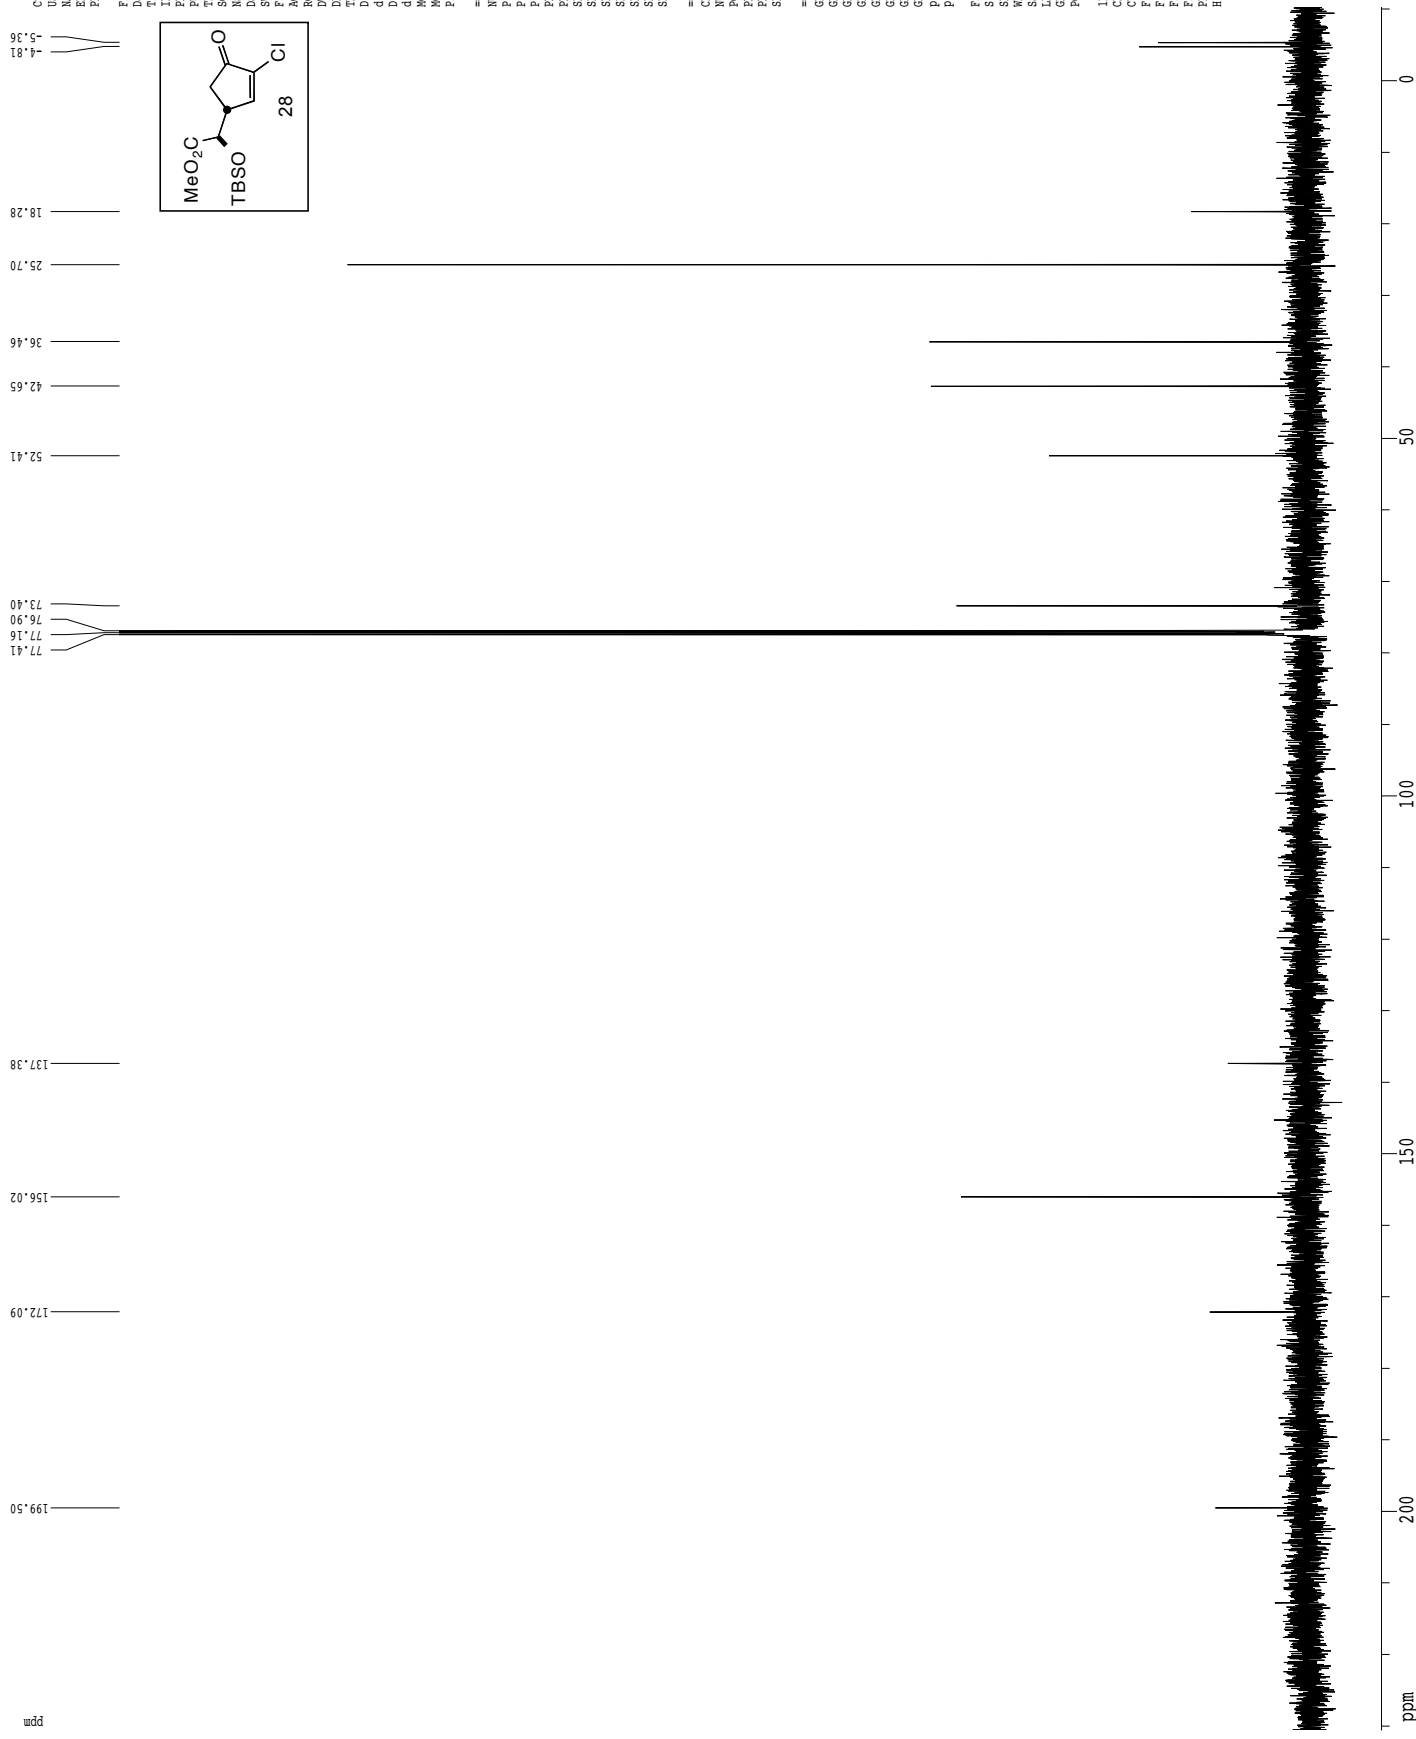

ppm

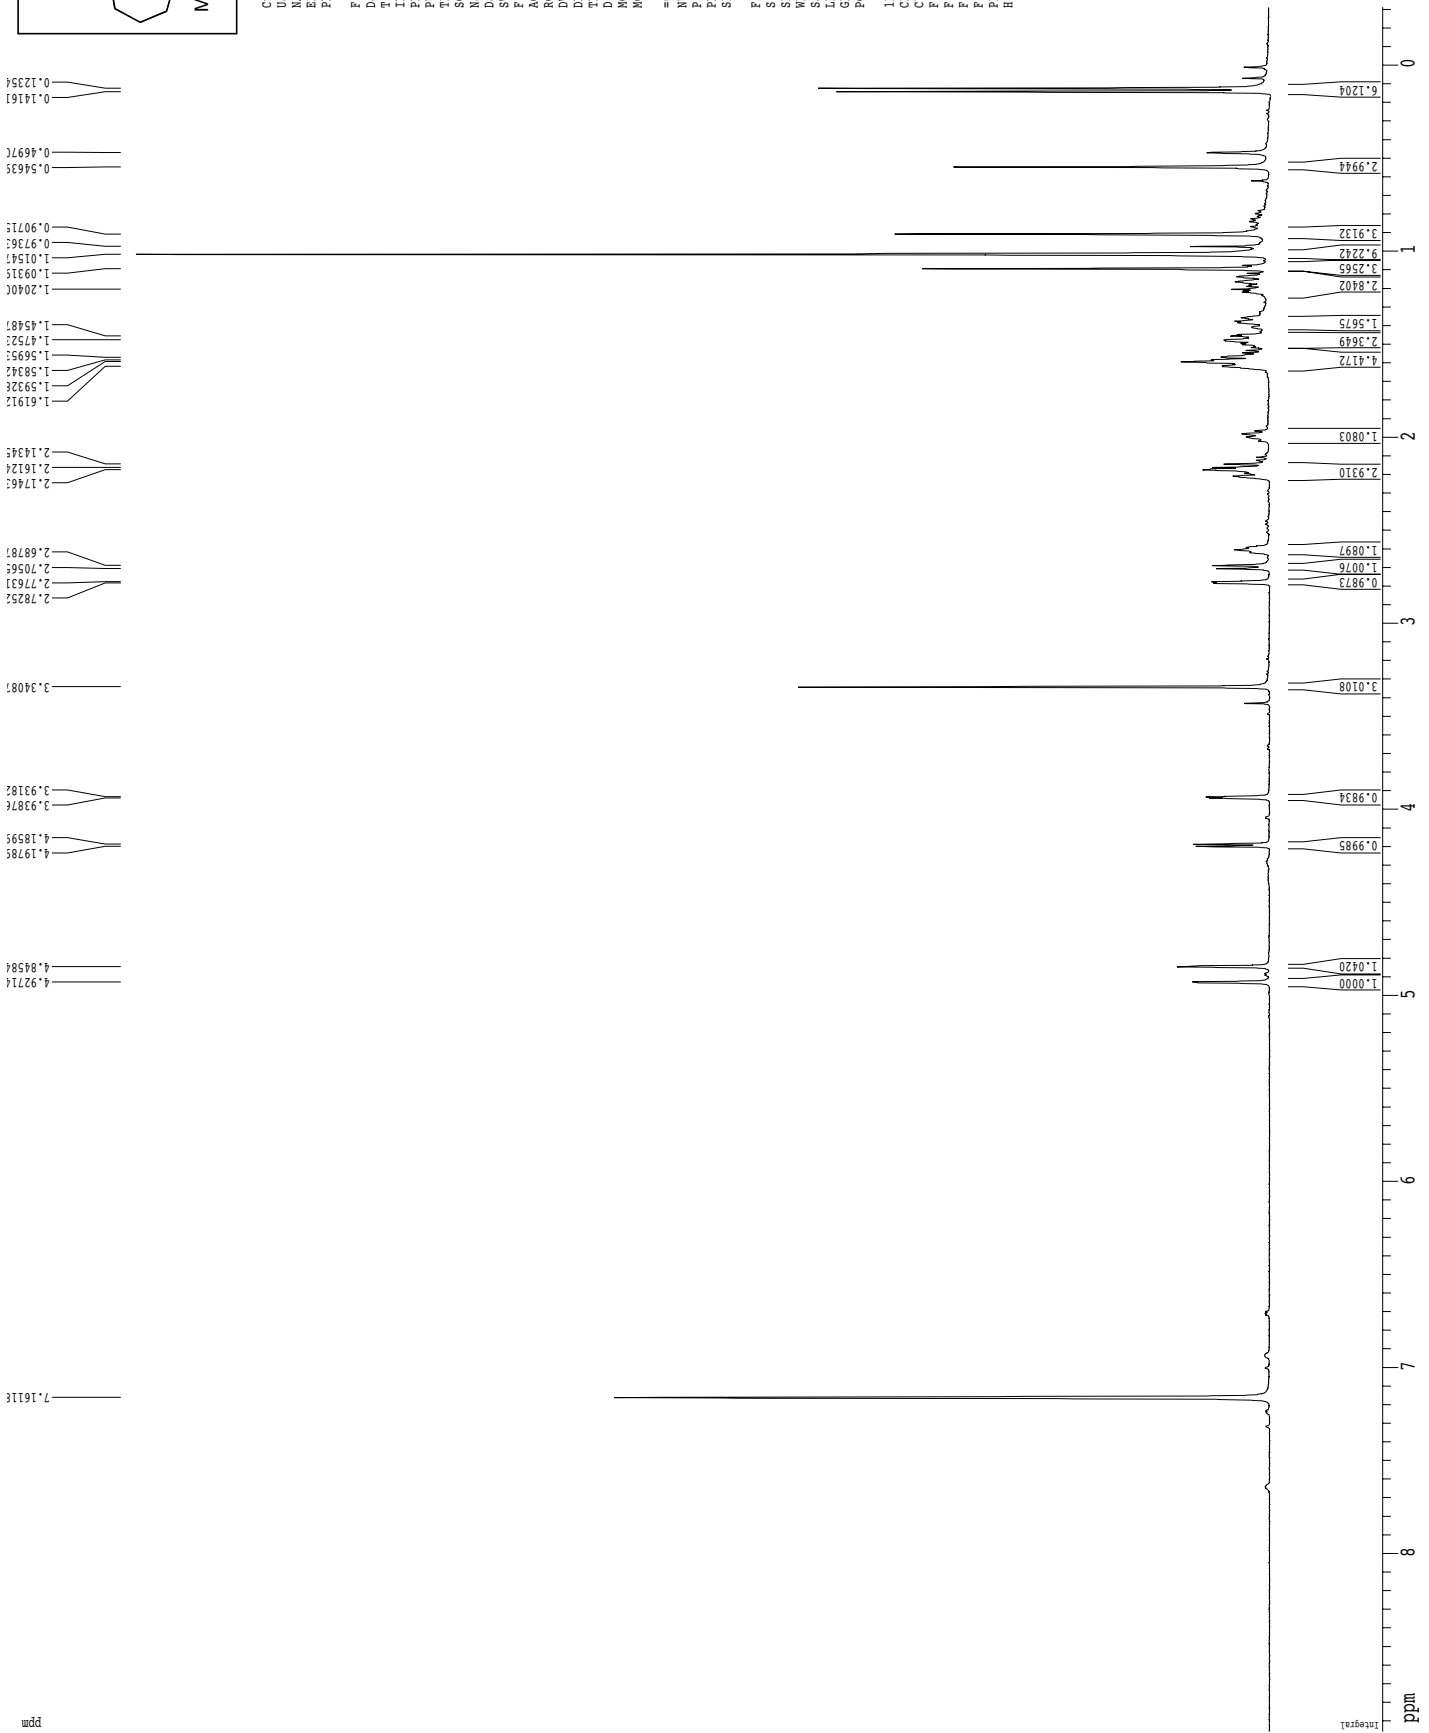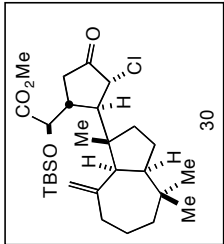

Current Data Parameters  
 USER schner  
 NAME mjs4-249-3  
 EXPNO 1  
 PROCNO 1

F2 - Acquisition Parameters  
 Date\_ 20120502  
 Time 8:15  
 INSTRUM crys000  
 PROBHD 5 mm CPCLP1  
 PULPROG zgpg30  
 TD 81728  
 SOLVENT CDCl3  
 NS 5  
 DS 2  
 SWH 8012.820 Hz  
 FIDRES 0.098043 Hz  
 AQ 5.0998774 sec  
 RG 5  
 DW 62.400 usec  
 DE 6.00 usec  
 TE 298.0 K  
 MCREST 0.1000000 sec  
 MCRBK 0.0150000 sec  
 ===== CHANNEL f1 =====  
 NUCl 1H  
 P1 7.50 usec  
 PL1 1.60 dB  
 SFO1 500.2235015 MHz

F2 - Processing parameters  
 SI 65536  
 SF 500.2200000 MHz  
 WDW EM  
 GB 0  
 FB 0.30 Hz  
 SC 4.00  
 PC 4.00

1D NMR plot parameters  
 CX 22.80 cm  
 CY 15.00 cm  
 F1P 8.955 ppm  
 F1 4479.51 Hz  
 F2P -0.309 ppm  
 F2 -154.62 Hz  
 PRCH 0.40632 ppm/cm  
 HZCX 203.25116 Hz/cm

Z-restored spin-echo <sup>13</sup>C spectrum with 1H decoupling

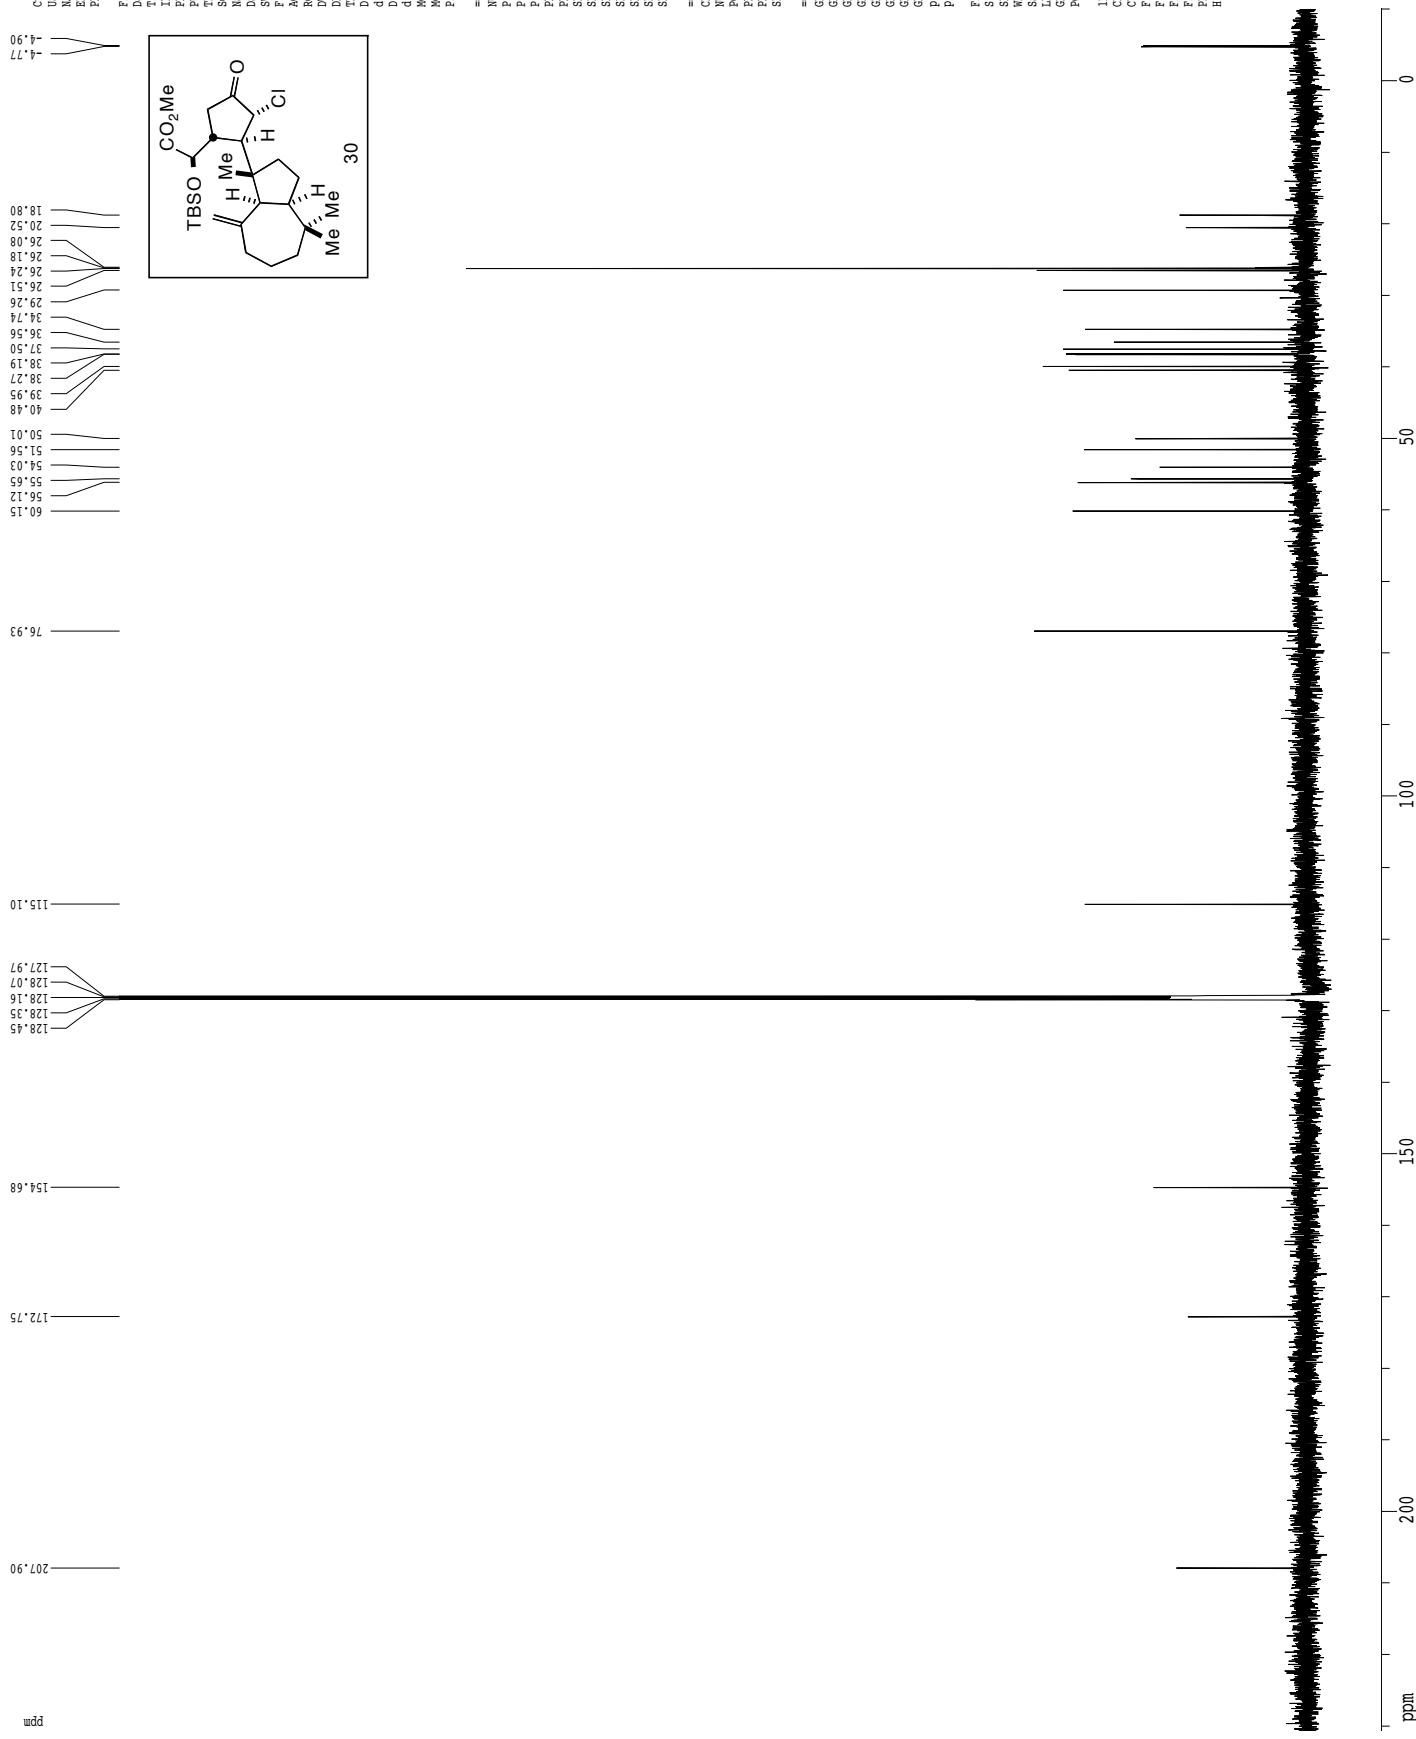

Current Data Parameters  
 USER: sctmcc  
 EXPER: mjs4-2-03-2  
 PROCNO: 1  
 F2 - Acquisition Parameters  
 Date\_: 20120502  
 Time: 8.17  
 INSTRUM: cryo500  
 PROBHD: 5 mm CPXI 1H  
 PULPROG: zgpg30  
 TD: 65536  
 SOLVENT: CDCl3  
 NS: 69  
 DS: 16  
 SHR: 30303.031 Hz  
 FIDRES: 0.462388 Hz  
 AQ: 1.0815940 sec  
 RG: 3649.4  
 DW: 6.00 usec  
 DE: 6.00 usec  
 TE: 298.2 K  
 D1: 0.25000000 sec  
 d11: 0.03000000 sec  
 D16: 0.00020000 sec  
 d17: 0.00015600 sec  
 ACRESF: 0.00000000 sec  
 ACWRK: 0.01500000 sec  
 F2: 3.00 usec

===== CHANNEL F1 =====  
 NUC1: <sup>13</sup>C  
 P1: 15.50 usec  
 P11: 500.00 usec  
 P12: 2000.00 usec  
 PL0: 120.00 dB  
 PL1: 7.00 dB  
 PL2: 125.794548 dB  
 SP1: 5.20 dB  
 SP2: 3.20 dB  
 SFO1: Ccp60, 0.5, 20.1  
 SFO2: Ccp60comp, 4  
 SFOFF1: 0.00 Hz  
 SFOFF2: 0.00 Hz

===== CHANNEL F2 =====  
 CDPREG: wd1616  
 NUC2: <sup>1</sup>H  
 P2: 100.00 usec  
 P21: 1.60 dB  
 P22: 24.60 dB  
 SFO2: 500.2225011 MHz

===== GRADIENT CHANNEL =====  
 GSPR1: 0.00 %  
 GSPR2: 0.00 %  
 GSPR3: 0.00 %  
 GSPR4: 0.00 %  
 GSPR5: 0.00 %  
 GSPR6: 0.00 %  
 GSPR7: 0.00 %  
 GSPR8: 0.00 %  
 GSPR9: 0.00 %  
 GSPR10: 0.00 %  
 GSPR11: 0.00 %  
 GSPR12: 0.00 %  
 GSPR13: 0.00 %  
 GSPR14: 0.00 %  
 GSPR15: 0.00 %  
 GSPR16: 0.00 %  
 GSPR17: 0.00 %  
 GSPR18: 0.00 %  
 GSPR19: 0.00 %  
 GSPR20: 0.00 %  
 GSPR21: 0.00 %  
 GSPR22: 0.00 %  
 GSPR23: 0.00 %  
 GSPR24: 0.00 %  
 GSPR25: 0.00 %  
 GSPR26: 0.00 %  
 GSPR27: 0.00 %  
 GSPR28: 0.00 %  
 GSPR29: 0.00 %  
 GSPR30: 0.00 %  
 GSPR31: 0.00 %  
 GSPR32: 0.00 %  
 GSPR33: 0.00 %  
 GSPR34: 0.00 %  
 GSPR35: 0.00 %  
 GSPR36: 0.00 %  
 GSPR37: 0.00 %  
 GSPR38: 0.00 %  
 GSPR39: 0.00 %  
 GSPR40: 0.00 %  
 GSPR41: 0.00 %  
 GSPR42: 0.00 %  
 GSPR43: 0.00 %  
 GSPR44: 0.00 %  
 GSPR45: 0.00 %  
 GSPR46: 0.00 %  
 GSPR47: 0.00 %  
 GSPR48: 0.00 %  
 GSPR49: 0.00 %  
 GSPR50: 0.00 %  
 GSPR51: 0.00 %  
 GSPR52: 0.00 %  
 GSPR53: 0.00 %  
 GSPR54: 0.00 %  
 GSPR55: 0.00 %  
 GSPR56: 0.00 %  
 GSPR57: 0.00 %  
 GSPR58: 0.00 %  
 GSPR59: 0.00 %  
 GSPR60: 0.00 %  
 GSPR61: 0.00 %  
 GSPR62: 0.00 %  
 GSPR63: 0.00 %  
 GSPR64: 0.00 %  
 GSPR65: 0.00 %  
 GSPR66: 0.00 %  
 GSPR67: 0.00 %  
 GSPR68: 0.00 %  
 GSPR69: 0.00 %  
 GSPR70: 0.00 %  
 GSPR71: 0.00 %  
 GSPR72: 0.00 %  
 GSPR73: 0.00 %  
 GSPR74: 0.00 %  
 GSPR75: 0.00 %  
 GSPR76: 0.00 %  
 GSPR77: 0.00 %  
 GSPR78: 0.00 %  
 GSPR79: 0.00 %  
 GSPR80: 0.00 %  
 GSPR81: 0.00 %  
 GSPR82: 0.00 %  
 GSPR83: 0.00 %  
 GSPR84: 0.00 %  
 GSPR85: 0.00 %  
 GSPR86: 0.00 %  
 GSPR87: 0.00 %  
 GSPR88: 0.00 %  
 GSPR89: 0.00 %  
 GSPR90: 0.00 %  
 GSPR91: 0.00 %  
 GSPR92: 0.00 %  
 GSPR93: 0.00 %  
 GSPR94: 0.00 %  
 GSPR95: 0.00 %  
 GSPR96: 0.00 %  
 GSPR97: 0.00 %  
 GSPR98: 0.00 %  
 GSPR99: 0.00 %  
 GSPR100: 0.00 %

F2 - Processing parameters  
 SI: 65536  
 SF: 125.7803622 MHz  
 WDW: EM  
 SSB: 0  
 LB: 1.00 Hz  
 GB: 0  
 PC: 2.00

ID NMR plot parameters  
 CX: 22.80 cm  
 CY: 80.00 cm  
 FIP: 230.637 ppm  
 F1: 29005.67 Hz  
 F2: -10.287 ppm  
 F3: -1293.96 Hz  
 F4: 115.068 ppm/cm  
 F5: 1329.10645 Hz/cm
